# Supplementary material for: Phylogeny of Cas9 determines functional exchangeability of dual-RNA and Cas9 among orthologous type II CRISPR-Cas systems
Source: PubMed Central journal article supplement (PMC3936727; doi:10.1093/nar/gkt1074), 2013-11-21
Supplement: supp_gkt1074_nar-02672-z-2013-File008.pdf [file supp_gkt1074_nar-02672-z-2013-File008.pdf]

## Supplementary Table S1. Strains, plasmids and primers used in the study.

| Strain                                                        | Relevant characteristics                                    | Source                |
|---------------------------------------------------------------|-------------------------------------------------------------|-----------------------|
| <b><u>Streptococcus pyogenes</u></b>                          |                                                             |                       |
| <b><u>WT</u></b>                                              |                                                             |                       |
| EC904                                                         | SF370 (M1 serotype) (WT)                                    | ATCC 700294           |
| <b><u>Δcas9</u></b>                                           |                                                             |                       |
| EC1788                                                        | EC904Δcas9                                                  | (16)                  |
| <b><u>Δrnc</u></b>                                            |                                                             |                       |
| EC1636                                                        | EC904Δrnc                                                   | (16)                  |
| <b><u>Δcas9 in SF370 + cas9 complementations in trans</u></b> |                                                             |                       |
| EC2121                                                        | EC1788 + pEC714 (Pcas9(Spy)-cas9(Spy)-CtHis)                | This study            |
| EC2127                                                        | EC1788 + pEC710 (171 tracrRNA-Pcas9(Spy)-CtHis)             | This study            |
| EC2150                                                        | EC1788 + pEC553 (Pcas9(Spy)-cas9-HH983AA(Spy)-CtHis)        | This study            |
| EC2151                                                        | EC1788 + pEC554 (Pcas9(Spy)-cas9-D10A(Spy)-CtHis)           | This study            |
| EC2152                                                        | EC1788 + pEC555 (Pcas9(Spy)-cas9-H840A(Spy)-CtHis)          | This study            |
| EC2153                                                        | EC1788 + pEC556 (Pcas9(Spy)-cas9-N854A(Spy)-CtHis)          | This study            |
| EC2154                                                        | EC1788 + pEC557 (Pcas9(Spy)-cas9-N863A(Spy)-CtHis)          | This study            |
| EC2155                                                        | EC1788 + pEC558 (Pcas9(Spy)-cas9-D986A(Spy)-CtHis)          | This study            |
| EC2156                                                        | EC1788 + pEC559 (Pcas9(Spy)-cas9-E762A(Spy)-CtHis)          | This study            |
| EC2118                                                        | EC1788 + pEC518 (Pcas9(Spy)-cas9(Cje)-CtHis)                | This study            |
| EC2128                                                        | EC1788 + pEC538 (Pcas9(Spy)-cas9(Fno)-CtHis)                | This study            |
| EC2199                                                        | EC1788 + pEC544 (Pcas9(Spy)-cas9(Nme)-CtHis)                | This study            |
| EC2119                                                        | EC1788 + pEC520 (Pcas9(Spy)-cas9(Pmu)-CtHis)                | This study            |
| EC2111                                                        | EC1788 + pEC519 (Pcas9(Spy)-cas9(Smu)-CtHis)                | This study            |
| EC2112                                                        | EC1788 + pEC521 (Pcas9(Spy)-cas9(Sth*)-CtHis)               | This study            |
| EC2120                                                        | EC1788 + pEC522 (Pcas9(Spy)-cas9(Sth**)-CtHis)              | This study            |
| <b><u>Δrnc in SF370 + rnc complementations in trans</u></b>   |                                                             |                       |
| EC2076                                                        | EC1636 + pEC484 (Prnc(Spy)-rnc(Spy))                        | This study            |
| EC2084                                                        | EC1636 + pEC505 (Prnc(Spy)-rnc-catalytically inactive(Spy)) | This study            |
| EC2083                                                        | EC1636 + pEC504 (Prnc(Spy)-rnc-RNA binding inactive(Spy))   | This study            |
| EC2078                                                        | EC1636 + pEC486 (Prnc(Spy)-rnc(Cje))                        | This study            |
| EC2080                                                        | EC1636 + pEC492 (Prnc(Spy)-rnc(Eco))                        | This study            |
| EC2126                                                        | EC1636 + pEC537 (Prnc(Spy)-rnc(Fno))                        | This study            |
| EC2085                                                        | EC1636 + pEC506 (Prnc(Spy)-rnc(Nme))                        | This study            |
| EC2077                                                        | EC1636 + pEC485 (Prnc(Spy)-rnc(Pmu))                        | This study            |
| EC2086                                                        | EC1636 + pEC507 (Prnc(Spy)-rnc(Sau))                        | This study            |
| EC2082                                                        | EC1636 + pEC494 (Prnc(Spy)-rnc(Smu))                        | This study            |
| EC2131                                                        | EC1636 + pEC534 (Prnc(Spy)-rnc(Sth))                        | This study            |
| <b><u>Campylobacter jejuni</u></b>                            |                                                             |                       |
| EC437                                                         | NCTC 11168; ATCC 700819 (WT), CIP 107370                    | Pasteur Institute     |
| <b><u>Francisella novicida</u></b>                            |                                                             |                       |
| EC1041                                                        | U112 (WT)                                                   | Anders Sjöstedt       |
| <b><u>Neisseria meningitidis</u></b>                          |                                                             |                       |
| EC438                                                         | CIP 107858                                                  | Pasteur Institute     |
| <b><u>Pasteurella multocida</u></b>                           |                                                             |                       |
| EC439                                                         | Pm70 (WT), ATCC BAA-1113                                    | Pasteur Institute     |
| <b><u>Staphylococcus aureus</u></b>                           |                                                             |                       |
| EC36                                                          | COL (WT)                                                    | Lab strain collection |
| <b><u>Streptococcus mutans</u></b>                            |                                                             |                       |
| EC1293                                                        | UA159 (WT)                                                  | (16)                  |
| <b><u>Streptococcus thermophilus</u></b>                      |                                                             |                       |
| EC810                                                         | LMD-9 (WT)                                                  | (16)                  |
| <b><u>E. coli</u></b>                                         |                                                             |                       |
| RDN204                                                        | TOP10, host for cloning                                     | Invitrogen            |
| EC1265                                                        | Rosetta                                                     | Novagen               |

<sup>a</sup> Cje: *Campylobacter jejuni* NCTC 11168; Eco: *Escherichia coli* TOP10; Fno: *Francisella novicida* U112; Nme: *Neisseria meningitidis* A Z2491; Pmu: *Pasteurella multocida* Pm70; Sau: *Staphylococcus aureus* COL; Smu: *Streptococcus mutans* UA159; Spy: *Streptococcus pyogenes* SF370; Sth: *Streptococcus thermophilus* LMD-9.

| Plasmid                                                                                                 | Relevant characteristics                                               | Source                 |
|---------------------------------------------------------------------------------------------------------|------------------------------------------------------------------------|------------------------|
| <b>Vectors for <i>S. pyogenes</i></b>                                                                   |                                                                        |                        |
| pEC85                                                                                                   | <i>repDEG</i> -pAMβ1, pJH1- <i>aphIII</i> , ColE1                      | Bernhard Roppenser     |
| <b>Plasmids for <i>cas9</i> domain functional and co-evolution analysis in <i>S. pyogenes</i> SF370</b> |                                                                        |                        |
| pEC268                                                                                                  | pEC85Ω171 <i>tracrRNA</i> (171 nt form)                                | (16)                   |
| pEC309                                                                                                  | pEC85Ω <i>Pcas9</i> (Spy)- <i>cas9</i> (Spy)                           | (16)                   |
| pEC368                                                                                                  | pEC85Ω171 <i>tracrRNA</i> - <i>Pcas9</i> (Spy)- <i>cas9</i> (Spy)      | (16)                   |
| pEC710                                                                                                  | pEC85Ω171 <i>tracrRNA</i> - <i>Pcas9</i> (Spy)-CtHis                   | This study             |
| pEC714                                                                                                  | pEC710Ω <i>cas9</i> (Spy)                                              | This study             |
| pEC553                                                                                                  | pEC710Ω <i>cas9</i> -HH983AA(Spy)-CtHis                                | This study             |
| pEC615                                                                                                  | pEC553Ω <i>speM</i>                                                    | This study             |
| pEC554                                                                                                  | pEC710Ω <i>cas9</i> -D10A(Spy)-CtHis                                   | This study             |
| pEC659                                                                                                  | pEC554Ω <i>speM</i>                                                    | This study             |
| pEC555                                                                                                  | pEC710Ω <i>cas9</i> -H840A(Spy)-CtHis                                  | This study             |
| pEC660                                                                                                  | pEC555Ω <i>speM</i>                                                    | This study             |
| pEC556                                                                                                  | pEC710Ω <i>cas9</i> -N854A(Spy)-CtHis                                  | This study             |
| pEC661                                                                                                  | pEC556Ω <i>speM</i>                                                    | This study             |
| pEC557                                                                                                  | pEC710Ω <i>cas9</i> -N863A(Spy)-CtHis                                  | This study             |
| pEC618                                                                                                  | pEC557Ω <i>speM</i>                                                    | This study             |
| pEC558                                                                                                  | pEC710Ω <i>cas9</i> -D986A(Spy)-CtHis                                  | This study             |
| pEC662                                                                                                  | pEC558Ω <i>speM</i>                                                    | This study             |
| pEC559                                                                                                  | pEC710Ω <i>cas9</i> -E762A(Spy)-CtHis                                  | This study             |
| pEC619                                                                                                  | pEC559Ω <i>speM</i>                                                    | This study             |
| pEC518                                                                                                  | pEC710Ω <i>cas9</i> (Cje)-CtHis                                        | This study             |
| pEC538                                                                                                  | pEC710Ω <i>cas9</i> (Fno)-CtHis                                        | This study             |
| pEC544                                                                                                  | pEC710Ω <i>cas9</i> (Nme)-CtHis                                        | This study             |
| pEC520                                                                                                  | pEC710Ω <i>cas9</i> (Pmu)-CtHis                                        | This study             |
| pEC519                                                                                                  | pEC710Ω <i>cas9</i> (Smu)-CtHis                                        | This study             |
| pEC521                                                                                                  | pEC710Ω <i>cas9</i> (Sth*)-CtHis                                       | This study             |
| pEC522                                                                                                  | pEC710Ω <i>cas9</i> (Sth**)-CtHis                                      | This study             |
| <b>Plasmids for <i>mc</i> co-evolution analysis in <i>S. pyogenes</i> SF370</b>                         |                                                                        |                        |
| pEC483                                                                                                  | pEC85Ω <i>Pmc</i> (Spy)                                                | This study             |
| pEC484                                                                                                  | pEC85Ω <i>Pmc</i> (Spy)- <i>mc</i> (Spy)                               | This study             |
| pEC505                                                                                                  | pEC85Ω <i>Pmc</i> (Spy)- <i>mc</i> -catalytically inactive(Spy)        | This study             |
| pEC504                                                                                                  | pEC85Ω <i>Pmc</i> (Spy)- <i>mc</i> -RNA binding inactive(Spy)          | This study             |
| pEC486                                                                                                  | pEC85Ω <i>Pmc</i> (Spy)- <i>mc</i> (Cje)                               | This study             |
| pEC492                                                                                                  | pEC85Ω <i>Pmc</i> (Spy)- <i>mc</i> (Eco)                               | This study             |
| pEC537                                                                                                  | pEC85Ω <i>Pmc</i> (Spy)- <i>mc</i> (Fno)                               | This study             |
| pEC506                                                                                                  | pEC85Ω <i>Pmc</i> (Spy)- <i>mc</i> (Nme)                               | This study             |
| pEC485                                                                                                  | pEC85Ω <i>Pmc</i> (Spy)- <i>mc</i> (Pmu)                               | This study             |
| pEC507                                                                                                  | pEC85Ω <i>Pmc</i> (Spy)- <i>mc</i> (Sau)                               | This study             |
| pEC494                                                                                                  | pEC85Ω <i>Pmc</i> (Spy)- <i>mc</i> (Smu)                               | This study             |
| pEC534                                                                                                  | pEC85Ω <i>Pmc</i> (Spy)- <i>mc</i> (Sth)                               | This study             |
| <b>Plasmids for protospacer study <i>in vitro</i></b>                                                   |                                                                        |                        |
| pEC287                                                                                                  | pEC85Ω <i>PspeM-speM</i><br>(10 bp downstream protospacer: GGGTATTGGG) | Lab plasmid collection |
| pEC691                                                                                                  | pEC287 (10 bp downstream protospacer: TGGTATTGGG)                      | This study             |
| pEC692                                                                                                  | pEC287 (10 bp downstream protospacer: TGGTGTGGG)                       | This study             |
| pEC693                                                                                                  | pEC287 (10 bp downstream protospacer: GGGTGATTGG)                      | This study             |
| pEC694                                                                                                  | pEC287 (10 bp downstream protospacer: GGAGAATGGG)                      | This study             |
| pEC696                                                                                                  | pEC287 (10 bp downstream protospacer: GGGTCATAGG)                      | This study             |
| pEC697                                                                                                  | pEC287 (10 bp downstream protospacer: AGAAACAGGG)                      | This study             |
| pEC698                                                                                                  | pEC287 (10 bp downstream protospacer: AGAACCAGGG)                      | This study             |
| pEC701                                                                                                  | pEC287 (10 bp downstream protospacer: GTTTGATTGG)                      | This study             |
| pEC706                                                                                                  | pEC287 (10 bp downstream protospacer: GGAAAATGGG)                      | This study             |
| <b>Plasmids for <i>Cas9</i> overexpression</b>                                                          |                                                                        |                        |
| pEC225                                                                                                  | pET16b                                                                 | Novagen                |
| pEC621                                                                                                  | pEC225 inserted with cassette harboring NotI, SacI, Sall site          | This study             |
| pEC626                                                                                                  | pEC621Ω <i>cas9</i> (Spy)                                              | This study             |
| pEC627                                                                                                  | pEC621Ω <i>cas9</i> -D10A(Spy)                                         | This study             |
| pEC628                                                                                                  | pEC621Ω <i>cas9</i> -E762A(Spy)                                        | This study             |
| pEC629                                                                                                  | pEC621Ω <i>cas9</i> -H840A(Spy)                                        | This study             |
| pEC630                                                                                                  | pEC621Ω <i>cas9</i> -N854A(Spy)                                        | This study             |
| pEC631                                                                                                  | pEC621Ω <i>cas9</i> -HH983AA(Spy)                                      | This study             |
| pEC632                                                                                                  | pEC621Ω <i>cas9</i> (Cje)                                              | This study             |
| pEC633                                                                                                  | pEC621Ω <i>cas9</i> (Pmu)                                              | This study             |
| pEC634                                                                                                  | pEC621Ω <i>cas9</i> (Nme)                                              | This study             |
| pEC635                                                                                                  | pEC621Ω <i>cas9</i> (Smu)                                              | This study             |
| pEC638                                                                                                  | pEC621Ω <i>cas9</i> -N863A(Spy)                                        | This study             |
| pEC639                                                                                                  | pEC621Ω <i>cas9</i> -D986A(Spy)                                        | This study             |
| pEC640                                                                                                  | pEC621Ω <i>cas9</i> (Sth*)                                             | This study             |
| pEC641                                                                                                  | pEC621Ω <i>cas9</i> (Sth**)                                            | This study             |
| pEC657                                                                                                  | pEC621Ω <i>cas9</i> (Fno)                                              | This study             |

| Purpose                                                                   | Primer   | Sequence 5'-3' <sup>a</sup>                                                       | F/R <sup>b</sup> | Usage <sup>c</sup>                                   |
|---------------------------------------------------------------------------|----------|-----------------------------------------------------------------------------------|------------------|------------------------------------------------------|
| <b>tracrRNA expression in <i>S. pyogenes</i> SF370</b>                    |          |                                                                                   |                  |                                                      |
| tracrRNA                                                                  | OLEC1014 | GGACTAGCCTTATTTAACTTG                                                             | R                | NB (3' probe)                                        |
| <b>crRNA (CRISPR01 (type II-A) expression in <i>S. pyogenes</i> SF370</b> |          |                                                                                   |                  |                                                      |
| crRNA                                                                     | OLEC1049 | GGACCATTCAAAAACAGCATAGCTCTAAAAAC                                                  | R                | NB (repeat)                                          |
| <b>Loading controls for Northern blots</b>                                |          |                                                                                   |                  |                                                      |
| 5S rRNA                                                                   | OLEC288  | CTAAGCGACTACCTTATCTCA                                                             | R                | NB                                                   |
| <b>His-tagged cas9 constructs (pEC85-based)</b>                           |          |                                                                                   |                  |                                                      |
| pEC710                                                                    | OLEC2151 | GCAGGAATTCATCAGTGATGGTGATGGTGATGCCCGGGTTTGTGCGACCT<br>CCTAAAAATAAAAAGTTTAAATTAATC | F                | Cloning                                              |
|                                                                           | OLEC2066 | GGTGGTCTGCAGGTTTGCAGTCAGAGTAGAATAGAAG                                             | R                |                                                      |
| pEC714                                                                    | OLEC2096 | ATGCAGGTCGACATGGATAAGAAATACTCAATAGGC                                              | F                | Expression cas9(Spy)                                 |
|                                                                           | OLEC2097 | ATGCAGCCCGGGTACCTCTAGCTGACTCAATC                                                  | R                |                                                      |
| speM                                                                      | OLEC2867 | ATGCAGCCTGCAGGGTGCAGAGAGAACTTGATTC AAC                                            | F                | Cloning of <i>speM</i> in other plasmids             |
|                                                                           | OLEC2868 | ATGCAGCCTGCAGGCTTCGTTTAAAGTAAACATCAAAGTG                                          | R                |                                                      |
| pEC518                                                                    | OLEC2104 | ATGCAGGTCGACGTGGCAAGAAATTTGGCATTGG                                                | F                | Cloning cas9(Cje)                                    |
|                                                                           | OLEC2105 | ATGCAGCCCGGGTTTTTAAATCTTCTCTTTGTC                                                 | R                |                                                      |
| pEC538                                                                    | OLEC2840 | ATTAGTCGACATGAATTTCAAAATATTGCCAATAG                                               | F                | Cloning cas9(Fno)                                    |
|                                                                           | OLEC2841 | ATTACCCGGGATTATTAGATGTTTCATTATAAATAC                                              | R                |                                                      |
| pEC544                                                                    | OLEC2092 | ATGCAGGTCGACATGGCTGCCTTCAAACCTAATCC                                               | F                | Cloning cas9(Nme)                                    |
|                                                                           | OLEC2093 | ATGCAGCCCGGGACGGACAGGGGGCGTTTTTCAG                                                | R                |                                                      |
| pEC520                                                                    | OLEC2100 | ATGCAGGTCGACATGCAAAACAACAAATTTAAGTTA                                              | F                | Cloning cas9(Pmu)                                    |
|                                                                           | OLEC2101 | ATGCAGCCCGGGACGCACAGGTTGCTTCTGCTGAG                                               | R                |                                                      |
| pEC519                                                                    | OLEC2090 | ATGCAGGTCGACATGAAAAAACCCTTACTCTATTGGAC                                            | F                | Cloning cas9(Smu)                                    |
|                                                                           | OLEC2091 | ATGCAGCCCGGGTCTCCTCCTAACTATTGAGATC                                                | R                |                                                      |
| pEC521                                                                    | OLEC2098 | ATGCAGGTCGACATGACTAAGCCATACTCAATTGG                                               | F                | Cloning cas9(Sth*)                                   |
|                                                                           | OLEC2099 | ATGCAGCCCGGGACCCCTCTCCTAGTTTGGCAAGGTC                                             | R                |                                                      |
| pEC522                                                                    | OLEC2102 | ATGCAGGTCGACATGAGTGACTTAGTTT TAGGACTTG                                            | F                | Cloning cas9(Sth**)                                  |
|                                                                           | OLEC2103 | ATGCAGCCCGGGAAAACTAGCTTAGGCTTATCACC                                               | R                |                                                      |
| pEC553                                                                    | OLEC2229 | GTACGTGAGATTAACAATTACGCTGCTGCCCATGATGCGTATCTA                                     | F                | Mutagenesis cas9-HH983AA(Spy)                        |
|                                                                           | OLEC2230 | TAGATACGCATCATGGGCAGCAGCGTAATTGTTAATCTCACGTAC                                     | R                |                                                      |
| pEC554                                                                    | OLEC2128 | GAAATACTCAATAGGCTTAGCTATCGGCACAAATAGCGTCCG                                        | F                | Mutagenesis cas9-D10A(Spy)                           |
|                                                                           | OLEC2129 | CGACGCTATTTGTGCCGATAGCTAAGCCTATTGAGTATTTT                                         | R                |                                                      |
| pEC555                                                                    | OLEC2223 | TTTAAAGTGATTATGATGTCGATGCTGTTCCACAAGTTTCCCT                                       | F                | Mutagenesis cas9-H840A(Spy)                          |
|                                                                           | OLEC2224 | AGGAAACTTTGTGGAACAATGGCATCGACATCATAACTCACTTAAA                                    | R                |                                                      |
| pEC556                                                                    | OLEC2225 | CCTTAAAGACGATTCAATAGACGCTAAGGCTTAAACGGTTCTGA                                      | F                | Mutagenesis cas9-N854A(Spy)                          |
|                                                                           | OLEC2226 | TCAGAACGCGTTAAGACCTTAGCGTCTATTGATCGTCTTTAAGG                                      | R                |                                                      |
| pEC557                                                                    | OLEC2227 | GGTCTTAAACGCGTTCTGATAAAGCTCGTGGTAAATCGGATAACGT                                    | F                | Mutagenesis cas9-N863A(Spy)                          |
|                                                                           | OLEC2228 | ACGTTATCCGATTTACCACGAGCTTTATCAGAACGCGTTAAGACC                                     | R                |                                                      |
| pEC558                                                                    | OLEC2231 | GTAACAATTACCATCATGCCCTAGCTGCGTATCTAAATGCCGTCG                                     | F                | Mutagenesis cas9-D986A(Spy)                          |
|                                                                           | OLEC2232 | CGACGGCATTTAGATACGCAGCATGGGCATGATGGTAAATTGTTAC                                    | R                |                                                      |
| pEC559                                                                    | OLEC2221 | CAGAAAAATATCGTTATTGCAATGGCAGGTGAAATCAGACA                                         | F                | Mutagenesis cas9-E762A(Spy)                          |
|                                                                           | OLEC2222 | TGCTGTATTTTACAGTCCATTGCAATAACGATATTTTCTG                                          | R                |                                                      |
| <b>rnc constructs (pEC85-based)</b>                                       |          |                                                                                   |                  |                                                      |
| pEC483                                                                    | OLEC2149 | ATGCAGGCATGCCTGTGATTTTGGCTTGTCTGATC                                               | F                | Cloning in pEC85                                     |
|                                                                           | OLEC3274 | ATGCAGAGCTCCATGGAAAATCCCTTTCATATTTGTGAGTAGACC                                     | R                |                                                      |
| pEC484                                                                    | OLEC2109 | ATGCAGCCATGGAACAGCTTGAAGAGTTACTCTCAAC                                             | F                | Cloning <i>rnc</i> (Spy), SEQ                        |
|                                                                           | OLEC1668 | CTTTTAAAAACATCTAAACCTCAC                                                          | R                |                                                      |
| pEC504                                                                    | OLEC2109 | ATGCAGCCATGGAACAGCTTGAAGAGTTACTCTCAAC                                             | F                | Cloning of <i>rnc</i> RNA binding inactive(Spy)      |
|                                                                           | OLEC2656 | ATGCAGGAATTCCTACCCTTTTTCCACTGAGGAATC                                              | R                |                                                      |
| pEC505                                                                    | OLEC2142 | GAACGCTTGGAAATTTTAGGAGCCGCTGTTCACAAATGATTATT                                      | F                | Mutagenesis of <i>mc</i> catalytically inactive(Spy) |
|                                                                           | OLEC2143 | AATAATCAATTGTAGAACAGCGGCTCCTAAAAATCCAAGCGTTC                                      | R                |                                                      |
| pEC486                                                                    | OLEC2116 | ATGCAGCCATGGAAAACATTTGAAAAGCTAGAGCAGAG                                            | F                | Cloning <i>rnc</i> (Cje), SEQ                        |
|                                                                           | OLEC2117 | ATGCAGGAATTCCTATAAAGCTCCTAATTTCTCAAG                                              | R                |                                                      |
| pEC492                                                                    | OLEC2124 | ATGCAGCCATGGACCCATCGTAATTAATCGGCTTC                                               | F                | Cloning <i>rnc</i> (Eco), SEQ                        |
|                                                                           | OLEC2125 | ATGCAGGAATTCCTCATTCCAGTCCAGTTTTCACAG                                              | R                |                                                      |
| pEC537                                                                    | OLEC2842 | ATTACCATGGTTCTTGAATATTCACGATTTTATAAC                                              | F                | Cloning <i>rnc</i> (Fno), SEQ                        |
|                                                                           | OLEC2843 | ATTGAATTCCTATTTTTCATGTAAGCCTTGTGTG                                                | R                |                                                      |
| pEC506                                                                    | OLEC2118 | ATGCAGCCATGGAAAGACGATGTTTGAACAGCAGG                                               | F                | Cloning <i>rnc</i> (Nme), SEQ                        |
|                                                                           | OLEC2119 | ATGCAGGAATTCCTATTCTTTTCTTCTCAGCGGC                                                | R                |                                                      |
| pEC485                                                                    | OLEC2114 | ATGCAGCCATGGCTCAAATTTAGAAGCTTTTACAACG                                             | F                | Cloning <i>rnc</i> (Pmu), SEQ                        |
|                                                                           | OLEC2115 | ATGCAGGAATTCCTATTCTCATTCCAATAATGT                                                 | R                |                                                      |
| pEC507                                                                    | OLEC2126 | ATGCAGCCATGGCTAAACAAAAGAAAGTGAGATAG                                               | F                | Cloning <i>rnc</i> (Sau), SEQ                        |
|                                                                           | OLEC2127 | ATGCAGGAATTCCTATTATTTGTTTAAATTTGCTTATAGG                                          | R                |                                                      |
| pEC494                                                                    | OLEC2110 | ATGCAGCCATGGAAACATTTAGAAAAAACTGGCAG                                               | F                | Cloning <i>rnc</i> (Smu), SEQ                        |
|                                                                           | OLEC2111 | ATGCAGGAATTCCTAAGAACCCTGTTGAAGTTTTC                                               | R                |                                                      |
| pEC534                                                                    | OLEC2849 | ATTACCATGGATCAACTTGAACAAAACTTGAACAGGACTTTGG                                       | F                | Cloning <i>rnc</i> (Sth), SEQ                        |
|                                                                           | OLEC2850 | ATTAGAATTCCTAATTACCTAGTTGTTCAAGGGCAGACTTCGC                                       | R                |                                                      |
| <b>Cas9 overexpression (pEC621 based)</b>                                 |          |                                                                                   |                  |                                                      |
| pEC621                                                                    | OLEC2978 | TAGCGGCCGCGAGCTCCTCGAGCGC                                                         | F                | Cassette inserting NotI, SacI, Sall site in pEC225   |
|                                                                           | OLEC2979 | TAGCGTCCGAGCTCGCGGCCGC                                                            | R                |                                                      |

|                                                                                                              |          |                                                                                                                              |   |                                   |
|--------------------------------------------------------------------------------------------------------------|----------|------------------------------------------------------------------------------------------------------------------------------|---|-----------------------------------|
| pEC626, 627, 628, 629, 630, 631, 638, 639                                                                    | OLEC2097 | ATGCAGGTCGACATGGATAAGAAATACTCAATAGGC                                                                                         | F | Cloning cas9(Spy and all mutants) |
|                                                                                                              | OLEC2983 | AGCTAGCGGCCGCTCAGTACCTCCTAGCTGACTCAAATC                                                                                      | R |                                   |
| pEC632                                                                                                       | OLEC2104 | ATGCAGGTCGACGTGGCAAGAATTTGGCATTG                                                                                             | F | Cloning cas9(Cje)                 |
|                                                                                                              | OLEC2986 | ATGCAGCGGCCGCTCATTTTTTAAAACTTCTCTTTGTC                                                                                       | R |                                   |
| pEC633                                                                                                       | OLEC2100 | ATGCAGGTCGACATGCAAAACAACAATTTAAGTTA                                                                                          | F | Cloning cas9(Pmu)                 |
|                                                                                                              | OLEC2173 | ATGACCGGCCGCTTAACGCACAGGTTGTCTTTGCTG                                                                                         | R |                                   |
| pEC634                                                                                                       | OLEC2092 | ATGCAGGTCGACATGGCTGCCTTCAAACCTAATCC                                                                                          | F | Cloning cas9(Nme)                 |
|                                                                                                              | OLEC2982 | ATGACCGGCCGCTTAACGGACAGCGGGCGTTTTTCAG                                                                                        | R |                                   |
| pEC635                                                                                                       | OLEC2090 | ATGCAGGTCGACATGAAAAAACCTTACTCTATTGGAC                                                                                        | F | Cloning cas9(Smu)                 |
|                                                                                                              | OLEC2981 | ATGACCGGCCGCTTAGTCTCCTCTAACTTATTGAG                                                                                          | R |                                   |
| pEC640                                                                                                       | OLEC2098 | ATGCAGGTCGACATGACTAAGCCATACTCAATTGG                                                                                          | F | Cloning cas9(Sth*)                |
|                                                                                                              | OLEC2984 | ATGACCGGCCGCTTAACCTCTCCTAGTTGGCAAG                                                                                           | R |                                   |
| pEC641                                                                                                       | OLEC2102 | ATGCAGGTCGACATGAGTGACTTAGTTTTAGGACTG                                                                                         | F | Cloning cas9(Sth**)               |
|                                                                                                              | OLEC2985 | ATGACCGGCCGCTTAAAAATCTAGCTTAGGCTTATCAC                                                                                       | R |                                   |
| pEC657                                                                                                       | OLEC2840 | ATTAGTCGACATGAATTTCAAATAATTTGCCAATAG                                                                                         | F | Cloning cas9(Fno)                 |
|                                                                                                              | OLEC2987 | ATGCAGCGGCCGCTAATTATTAGATGTTTCATTATAAATAC                                                                                    | R |                                   |
| <b>Mutagenesis 10 bp downstream of <i>speM</i> protospacer</b>                                               |          |                                                                                                                              |   |                                   |
| pEC691                                                                                                       | OLEC3140 | CAACCACTAATTTCTAGAAAAATCTTCG                                                                                                 | R | Mutagenesis on pEC287             |
|                                                                                                              | OLEC3141 | CAATTTGTAAAAAATGGTATTGGGAATTC                                                                                                | F |                                   |
| pEC692                                                                                                       | OLEC3140 | CAACCACTAATTTCTAGAAAAATCTTCG                                                                                                 | R | Mutagenesis on pEC287             |
|                                                                                                              | OLEC3142 | CAATTTGTAAAAAATGGTATTGGGAATTC                                                                                                | F |                                   |
| pEC693                                                                                                       | OLEC3140 | CAACCACTAATTTCTAGAAAAATCTTCG                                                                                                 | R | Mutagenesis on pEC287             |
|                                                                                                              | OLEC3144 | CAATTTGTAAAAAAGGGTGATTGGGAATTC                                                                                               | F |                                   |
| pEC694                                                                                                       | OLEC3140 | CAACCACTAATTTCTAGAAAAATCTTCG                                                                                                 | R | Mutagenesis on pEC287             |
|                                                                                                              | OLEC3143 | CAATTTGTAAAAAAGGAGAAATGGGAATTC                                                                                               | F |                                   |
| pEC696                                                                                                       | OLEC3194 | CAACCACTAATTTT TAGAAAAATCTTCG                                                                                                | R | Mutagenesis on pEC693             |
|                                                                                                              | OLEC3197 | CAATTTGTAAAAAAGGGTCATAGGGAATTC                                                                                               | F |                                   |
| pEC697                                                                                                       | OLEC3194 | CAACCACTAATTTT TAGAAAAATCTTCG                                                                                                | R | Mutagenesis on pEC694             |
|                                                                                                              | OLEC3198 | CAATTTGTAAAAAAGAAACAGGGGAATTC                                                                                                | F |                                   |
| pEC698                                                                                                       | OLEC3194 | CAACCACTAATTTT TAGAAAAATCTTCG                                                                                                | R | Mutagenesis on pEC694             |
|                                                                                                              | OLEC3199 | CAATTTGTAAAAAAGAACAGGGGAATTC                                                                                                 | F |                                   |
| pEC701                                                                                                       | OLEC3194 | CAACCACTAATTTT TAGAAAAATCTTCG                                                                                                | R | Mutagenesis on pEC693             |
|                                                                                                              | OLEC3204 | CAATTTGTAAAAAAGTTTGATTGGGAATTC                                                                                               | F |                                   |
| pEC706                                                                                                       | OLEC3194 | CAACCACTAATTTT TAGAAAAATCTTCG                                                                                                | R | Mutagenesis on pEC694             |
|                                                                                                              | OLEC3208 | CAATTTGTAAAAAAGGAAATGGGAATTC                                                                                                 | F |                                   |
| <b>In vitro tracrRNA and crRNA of <i>Streptococcus pyogenes</i> SF370 (<i>speM</i> spacer underlined)</b>    |          |                                                                                                                              |   |                                   |
| T7-tracrRNA                                                                                                  | OLEC1521 | GAAATTAATACGACTCCTATAGAAAACAGCATAGCAAGTTAAAAATAA                                                                             | F | T7-tracrRNA 5'                    |
|                                                                                                              | OLEC1522 | AAAAAAGCACCAGACTCGGTGCCAC                                                                                                    | R | T7-tracrRNA 3'                    |
| T7-crRNA (template)                                                                                          | OLEC2177 | GAAATTAATACGACTCCTATAGGATAA ACTCAATTTGTAAAAAAGTTTT AGAGCTATGCTGTTTTG                                                         | F | crRNA <i>speM</i> 5'              |
|                                                                                                              | OLEC2179 | CAAAACAGCATAGCTCTAAAAC TTTTTTACAAATTGAGTTAT CCTATAG TGAGTCGTATTAATTC                                                         | R | crRNA <i>speM</i> 3'              |
| <b>In vitro tracrRNA and crRNA of <i>Neisseria meningitidis</i> A Z2491 (<i>speM</i> spacer underlined)</b>  |          |                                                                                                                              |   |                                   |
| T7-tracrRNA (template)                                                                                       | OLEC3083 | GAAATTAATACGACTCCTATAGGGAGAGCGAAATGAGAACCCTTGCTA CAATAAGGCCTCTGAAAAGATGTGCCGCAACGCTCTGCCCTTAAAGCT TCTGCTTTAAGGGGCATCGTTTTATT | F | T7-tracrRNA 5'                    |
|                                                                                                              | OLEC3084 | AATAAACGATGCCCTTAAAGCAGAAGCTTTAAGGGGCAGAGCGTTGCG GCACATCTTTTCAGACGCCTTATTGTAGCAACGGTTCTCATTTGCTCT CCTATAGTGAGTCGTATTAATTC    | R | T7-tracrRNA 3'                    |
| T7-crRNA (template)                                                                                          | OLEC2209 | GAAATTAATACGACTCCTATAGATGATAACTCAATTTGTAAAAAAGTT GTAGCTCCCTTTCTCATTT                                                         | F | crRNA <i>speM</i> 5'              |
|                                                                                                              | OLEC2214 | AAATGAGAAAGGGAGTACAAC TTTTTTACAAATTGAGTTATCATCTAT AGTGAGTCGTATTAATTC                                                         | R | crRNA <i>speM</i> 3'              |
| <b>In vitro tracrRNA and crRNA of <i>Streptococcus mutans</i> UA159 (<i>speM</i> spacer underlined)</b>      |          |                                                                                                                              |   |                                   |
| T7-tracrRNA                                                                                                  | OLEC3098 | GAAATTAATACGACTCCTATAGGAAACAACACAGCAAGTTAAAAAAG                                                                              | F | T7-tracrRNA 5'                    |
|                                                                                                              | OLEC3099 | AAATAAAAAAGCACCAGATCGG                                                                                                       | R | T7-tracrRNA 3'                    |
| T7-crRNA (template)                                                                                          | OLEC3085 | GAAATTAATACGACTCCTATAGGATAA ACTCAATTTGTAAAAAAGTTTT AGAGCTGTGTTGT                                                             | F | crRNA <i>speM</i> 5'              |
|                                                                                                              | OLEC3086 | ACAACACAGCTCTAAAAC TTTTTTACAAATTGAGTTAT CCTATAGTGAG TCGTATTAATTC                                                             | R | crRNA <i>speM</i> 3'              |
| <b>In vitro tracrRNA and crRNA of <i>Campylobacter jejuni</i> NCTC 11168 (<i>speM</i> spacer underlined)</b> |          |                                                                                                                              |   |                                   |
| T7-tracrRNA (template)                                                                                       | OLEC3128 | GAAATTAATACGACTCCTATAGGAAGGGACTAAAAATAAGAGTTTGCG GGACTCTGCGGGGTACAATCCCTAAAACCGC                                             | F | T7-tracrRNA 5'                    |
|                                                                                                              | OLEC3129 | GCGGTTTTAGGGGATTGTAAACCCGACAGTCCCGCAAACCTTTATTT TAGTCCCTTCC TATAGTGAGTCGTATTAATTC                                            | R | T7-tracrRNA 3'                    |
| T7-crRNA (template)                                                                                          | OLEC3087 | GAAATTAATACGACTCCTATAGGATAA ACTCAATTTGTAAAAAAGTTTT AGTCCCT                                                                   | F | crRNA <i>speM</i> 5'              |
|                                                                                                              | OLEC3088 | AGGGACTAAAAC TTTTTTACAAATTGAGTTAT CCTATAGTGAGTCGTAT TAATTC                                                                   | R | crRNA <i>speM</i> 3'              |

***In vitro* tracrRNA and crRNAs of *Francisella novicida* U112 (*speM* spacer underlined)**

|                     |          |                                                                                                   |   |                      |
|---------------------|----------|---------------------------------------------------------------------------------------------------|---|----------------------|
| T7-tracrRNA         | OLEC3102 | <b>GAAATTAATACGACTCACTATAG</b> <i>GGTACCAAATAATTAATGCTCTG</i>                                     | F | T7-tracrRNA 5'       |
|                     | OLEC3103 | <i>GTTATTCAGACGTGTCAAACAG</i>                                                                     | R | T7-tracrRNA 3'       |
| T7-crRNA (template) | OLEC3089 | <b>GAAATTAATACGACTCACTATAG</b> <i>GATAACTCAATTTGTAAAAAGTTTC</i><br><i>AGTTGCTGAATTATTTGGTAAAC</i> | F | crRNA <i>speM</i> 5' |
|                     | OLEC3090 | <i>GTTTACCAAATAATTCAGCAACTGAACTTTTTTACAAATTGAGTTATC</i><br><b>CTATAGTGAGTCGTATTAATTC</b>          | R | crRNA <i>speM</i> 3' |

***In vitro* tracrRNA and crRNAs of *Streptococcus thermophilus*\* LMD-9 (*speM* spacer underlined)**

|                     |          |                                                                                        |   |                      |
|---------------------|----------|----------------------------------------------------------------------------------------|---|----------------------|
| T7-tracrRNA         | OLEC3104 | <b>GAAATTAATACGACTCACTATAG</b> <i>GAACAACACAGCGAGTTAAAAATAAGG</i>                      | F | T7-tracrRNA 5'       |
|                     | OLEC3105 | <i>AAAAAAAACACCGAATCGGTG</i>                                                           | R | T7-tracrRNA 3'       |
| T7-crRNA (template) | OLEC3085 | <b>GAAATTAATACGACTCACTATAG</b> <i>GATAACTCAATTTGTAAAAAGTTT</i><br><i>AGAGCTGTGTTGT</i> | F | crRNA <i>speM</i> 5' |
|                     | OLEC3086 | <i>ACAACACAGCTCTAAAACTTTTTTACAAATTGAGTTATCCTATAGTGAG</i><br><b>TCGTATTAATTC</b>        | R | crRNA <i>speM</i> 3' |

***In vitro* tracrRNA and crRNAs of *Streptococcus thermophilus*\*\* LMD-9 (*speM* spacer underlined)**

|                     |          |                                                                                            |   |                      |
|---------------------|----------|--------------------------------------------------------------------------------------------|---|----------------------|
| T7-tracrRNA         | OLEC3106 | <b>GAAATTAATACGACTCACTATAG</b> <i>GCTTAAATCTGCAGAAGCTACAAAG</i>                            | F | T7-tracrRNA 5'       |
|                     | OLEC3107 | <i>AAATAACGAAAACACCCCTGCC</i>                                                              | R | T7-tracrRNA 3'       |
| T7-crRNA (template) | OLEC3091 | <b>GAAATTAATACGACTCACTATAG</b> <i>GATAACTCAATTTGTAAAAAGTTT</i><br><i>TGTACTCTCAAGATTTA</i> | F | crRNA <i>speM</i> 5' |
|                     | OLEC3092 | <i>TAAATCTTGAGAGTACAAAACTTTTTTACAAATTGAGTTATCCTATAG</i><br><b>TGAGTCGTATTAATTC</b>         | R | crRNA <i>speM</i> 3' |

***In vitro* tracrRNA and crRNAs of *Pasteurella multocida* Pm70 (*speM* spacer underlined)**

|                     |          |                                                                                                |   |                      |
|---------------------|----------|------------------------------------------------------------------------------------------------|---|----------------------|
| T7-tracrRNA         | OLEC3108 | <b>GAAATTAATACGACTCACTATAG</b> <i>GCTGCGAAATGAGAGACGTTGCTAC</i>                                | F | T7-tracrRNA 5'       |
|                     | OLEC3109 | <i>AAAAACGATGCCCTTGAATTAAG</i>                                                                 | R | T7-tracrRNA 3'       |
| T7-crRNA (template) | OLEC3093 | <b>GAAATTAATACGACTCACTATAG</b> <i>GATAACTCAATTTGTAAAAAGTTGT</i><br><i>AGTTCCCTCTCTCATTTCGC</i> | F | crRNA <i>speM</i> 5' |
|                     | OLEC3094 | <i>GCGAAATGAGAGGGGAACACAACTTTTTTACAAATTGAGTTATCCTA</i><br><b>TAGTGAGTCGTATTAATTC</b>           | R | crRNA <i>speM</i> 3' |

**Primers for sequencing analysis*****cas9* *Streptococcus mutans* UA159**

|                   |          |                                  |   |     |
|-------------------|----------|----------------------------------|---|-----|
| <i>cas9</i> (Smu) | OLEC2792 | <i>ATGAAAAAACCTTACTCTATTGGA</i>  | F | SEQ |
|                   | OLEC2793 | <i>GATTTTAAAAGCATTGAAATTA</i>    | F | SEQ |
|                   | OLEC2794 | <i>TACTTGCCAAATCAAAAAGTTCTT</i>  | F | SEQ |
|                   | OLEC2795 | <i>ATTATGGGACATCAACCTGAAAAAT</i> | F | SEQ |
|                   | OLEC2796 | <i>TACCCACAATTGGAACCTGAATTT</i>  | F | SEQ |

***cas9* *Neisseria meningitidis* A Z2491**

|                   |          |                                 |   |     |
|-------------------|----------|---------------------------------|---|-----|
| <i>cas9</i> (Nme) | OLEC2797 | <i>ATGGCTGCCTTCAAACCTAATCCA</i> | F | SEQ |
|                   | OLEC2798 | <i>GTCAAAAAAATGTTGGGCATTGC</i>  | F | SEQ |
|                   | OLEC2799 | <i>ATCCATATTGAAACTGCAAGGGAA</i> | F | SEQ |
|                   | OLEC2800 | <i>AACGCGTTTGACGGTAAAACCATA</i> | F | SEQ |

***cas9* *Streptococcus thermophilus*\* LMD-9**

|                    |          |                                 |   |     |
|--------------------|----------|---------------------------------|---|-----|
| <i>cas9</i> (Sth*) | OLEC2807 | <i>ATGACTAAGCCATACTCAATTGGA</i> | F | SEQ |
|                    | OLEC2808 | <i>GATTTTAGGAAATGTTTTAATTTA</i> | F | SEQ |
|                    | OLEC2809 | <i>TATTTGCCAGAAGAGAAGGTACTT</i> | F | SEQ |
|                    | OLEC2810 | <i>GTAATGGGAGGAAGAAAACCCGAG</i> | F | SEQ |
|                    | OLEC2811 | <i>GCAAGTCTTTACTTAAGAAATAC</i>  | F | SEQ |
|                    | OLEC2812 | <i>TTACTTTATCATGCTAAGAGAATA</i> | F | SEQ |

***cas9* *Streptococcus thermophilus*\*\* LMD-9**

|                     |          |                                 |   |     |
|---------------------|----------|---------------------------------|---|-----|
| <i>cas9</i> (Sth**) | OLEC2817 | <i>ATGAGTGACTTAGTTTTAGGACTT</i> | F | SEQ |
|                     | OLEC2818 | <i>ATTTTTGGAATCTAATTGGGAAA</i>  | F | SEQ |
|                     | OLEC2819 | <i>GGAGACTTTGACAATATTGTCATC</i> | F | SEQ |
|                     | OLEC2820 | <i>TTGAATTTGTGGAAAAACAAAAG</i>  | F | SEQ |
|                     | OLEC2821 | <i>CAGGAAAAATACAATGACATTAAG</i> | F | SEQ |

***cas9* *Pasteurella multocida* Pm70**

|                   |          |                                 |   |     |
|-------------------|----------|---------------------------------|---|-----|
| <i>cas9</i> (Pmu) | OLEC2813 | <i>ATGCAACAACAATAATTAAGTTAT</i> | F | SEQ |
|                   | OLEC2814 | <i>ACGCATGAAAAAATGAGTTTAAA</i>  | F | SEQ |
|                   | OLEC2815 | <i>CTTGGGAAATCTTTTAAAGAACGT</i> | F | SEQ |
|                   | OLEC2816 | <i>TATGAAATGGTGGATCAAGAAAGC</i> | F | SEQ |

***cas9* *Campylobacter jejuni* NCTC 11168**

|                   |          |                                 |   |     |
|-------------------|----------|---------------------------------|---|-----|
| <i>cas9</i> (Cje) | OLEC2822 | <i>GTGGCAAGAATTTGGCATTGAT</i>   | F | SEQ |
|                   | OLEC2823 | <i>GATGAAAAAAGAGCGCCAAAAAAT</i> | F | SEQ |
|                   | OLEC2824 | <i>AACTACAAGGCCAAAAAAGACGCC</i> | F | SEQ |
|                   | OLEC2825 | <i>AACAAAAGGAAGTTTTTGGAGCCT</i> | F | SEQ |

***cas9* *Francisella novicida* U112**

|                   |          |                                 |   |     |
|-------------------|----------|---------------------------------|---|-----|
| <i>cas9</i> (Fno) | OLEC2869 | <i>ATGAATTTCAAAATATTGCCAATA</i> | F | SEQ |
|                   | OLEC2870 | <i>TTAGATACTCTTTAACTGATGAT</i>  | F | SEQ |
|                   | OLEC2871 | <i>TTAAAAGTCTTAAAGTCAAGTAAA</i> | F | SEQ |
|                   | OLEC2872 | <i>GGTTCAGAAGATAAAAAAGGTAAT</i> | F | SEQ |
|                   | OLEC2873 | <i>AGAATTTCTGCCTACGTGATCTT</i>  | F | SEQ |
|                   | OLEC2874 | <i>CCAATACTAATCCATAAAGAATA</i>  | F | SEQ |
|                   | OLEC2875 | <i>ACATCAAAAAATATTTTTGGCTG</i>  | F | SEQ |

<sup>a</sup> *italic*, sequence annealing to the template; underlined, restriction site; **bold**, T7 promoter.

<sup>b</sup> F, forward primer; R, reverse primer.

<sup>c</sup> NB, probe for Northern blot; SEQ, sequencing

A

| Strain <sup>a</sup>             | GI accession number <sup>b</sup> | Amino acids (including purification-tag) | Molecular weight [kDa] (including purification-tag) | $\epsilon$ [ $M^{-1} cm^{-1}$ ] <sup>c</sup> |
|---------------------------------|----------------------------------|------------------------------------------|-----------------------------------------------------|----------------------------------------------|
| <i>S. pyogenes</i> SF370        | 13622193                         | 1368 (1392)                              | 158.4 (161.2)                                       | 110470                                       |
| <i>S. mutans</i> UA159          | 24379809                         | 1345 (1369)                              | 156.6 (159.4)                                       | 114190                                       |
| <i>S. thermophilus</i> * LMD-9  | 116628213                        | 1388 (1412)                              | 161.0 (163.8)                                       | 128390                                       |
| <i>S. thermophilus</i> ** LMD-9 | 116627542                        | 1121 (1145)                              | 129.4 (132.2)                                       | 103860                                       |
| <i>C. jejuni</i> NCTC 11168     | 218563121                        | 984 (1008)                               | 114.9 (117.7)                                       | 78640                                        |
| <i>N. meningitidis</i> A Z2491  | 218767588                        | 1082 (1106)                              | 124.3 (127.1)                                       | 101950                                       |
| <i>P. multocida</i> Pm70        | 15602992                         | 1056 (1080)                              | 121.8 (124.6)                                       | 121460                                       |
| <i>F. novicida</i> U112         | 118497352                        | 1629 (1653)                              | 190.4 (193.2)                                       | 189080                                       |

B

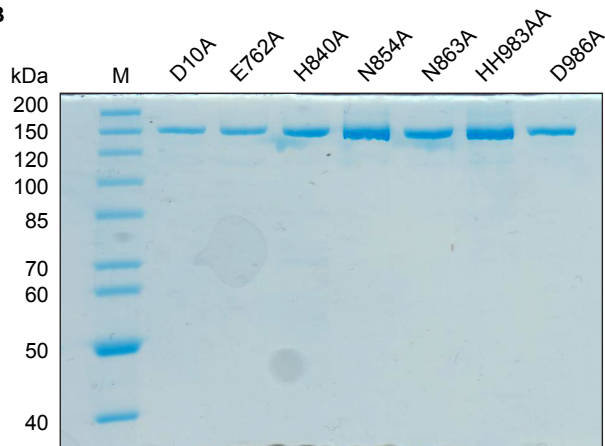

C

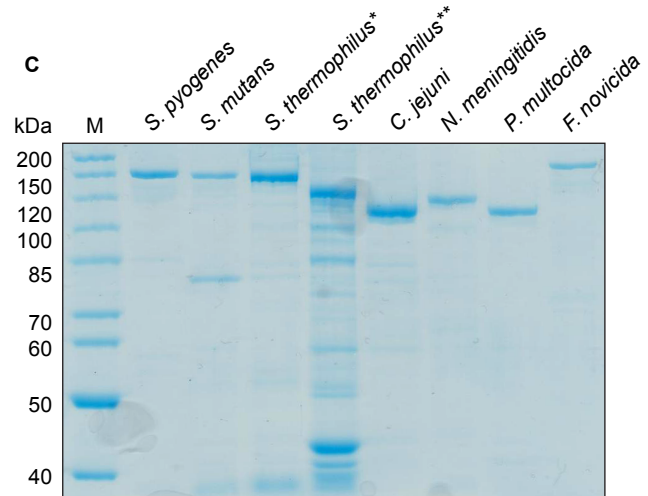

**Supplementary Figure S1. Biochemical characteristics and SDS-PAGE analysis of Cas9 proteins purified in this study.** (A) Overview of characteristics of Cas9 orthologous proteins <sup>a</sup>Note that the biochemical characteristics of *S. pyogenes* Cas9 WT and mutants are identical; <sup>b</sup>GenInfo (GI) Identifier; <sup>c</sup> $\epsilon$ , Extinction coefficient. (B) SDS PAGE analysis of purified mutants of Cas9 from *S. pyogenes*. (C) SDS PAGE analysis of purified Cas9 orthologs. M: PageRuler™ Unstained Protein Ladder (Thermo Scientific).

**Supplementary Table S2. List of bacterial strains with identified Cas9 orthologs.**

| Cluster <sup>a</sup> | Strain <sup>b</sup>                                                        | Cas9 length (aa) | Cas9 GI   | Cas1 GI <sup>c</sup> | Subtype <sup>d</sup> |
|----------------------|----------------------------------------------------------------------------|------------------|-----------|----------------------|----------------------|
|                      | <i>Dolosigranulum pigrum</i> ATCC 51524                                    | 1332             | 375088882 |                      |                      |
|                      | <i>Enterococcus faecalis</i> ATCC 29200                                    | 1337             | 229548613 |                      |                      |
|                      | <i>Enterococcus faecalis</i> ATCC 4200                                     | 1337             | 256617555 |                      |                      |
|                      | <i>Enterococcus faecalis</i> D6                                            | 1337             | 257086028 |                      |                      |
|                      | <i>Enterococcus faecalis</i> E1Sol                                         | 1337             | 257080914 |                      |                      |
|                      | <i>Enterococcus faecalis</i> OG1RF                                         | 1337             | 384512368 |                      |                      |
|                      | <i>Enterococcus faecalis</i> TX0470                                        | 1337             | 312900261 |                      |                      |
|                      | <i>Enterococcus faecalis</i> TX4244                                        | 1337             | 422695652 |                      |                      |
|                      | <i>Enterococcus faecium</i> 1,141,733                                      | 1339             | 257888853 |                      |                      |
|                      | <i>Enterococcus faecium</i> 1,231,408                                      | 1340             | 257893735 |                      |                      |
|                      | <i>Enterococcus faecium</i> E1133                                          | 1339             | 430847551 |                      |                      |
|                      | <i>Enterococcus faecium</i> E3083                                          | 1340             | 431757680 |                      |                      |
|                      | <i>Enterococcus faecium</i> PC4.1                                          | 1340             | 293379700 |                      |                      |
|                      | <i>Enterococcus faecium</i> TX1330                                         | 1340             | 227550972 |                      |                      |
|                      | <i>Enterococcus faecium</i> TX1337RF                                       | 1340             | 424765774 |                      |                      |
|                      | <i>Enterococcus hirae</i> ATCC 9790                                        | 1336             | 392988474 |                      |                      |
|                      | <i>Enterococcus italicus</i> DSM 15952                                     | 1330             | 315641599 |                      |                      |
|                      | <i>Lactobacillus animalis</i> KCTC 3501                                    | 1314             | 335357451 |                      |                      |
|                      | <i>Listeria innocua</i> ATCC 33091                                         | 1337             | 423101383 |                      |                      |
|                      | <i>Listeria innocua</i> Clip11262                                          | 1334             | 16801805  |                      |                      |
|                      | <i>Listeria innocua</i> FSL S4-378                                         | 1103             | 422414122 |                      |                      |
|                      | <i>Listeria ivanovii</i> FSL F6-596                                        | 953              | 315305353 |                      |                      |
|                      | <i>Listeria monocytogenes</i> 10403S                                       | 1334             | 386044902 |                      |                      |
|                      | <i>Listeria monocytogenes</i> FSL J1-175                                   | 1099             | 255520581 |                      |                      |
|                      | <i>Listeria monocytogenes</i> FSL J1-194                                   | 1334             | 254825045 |                      |                      |
|                      | <i>Listeria monocytogenes</i> FSL J1-208                                   | 1334             | 422810631 |                      |                      |
|                      | <i>Listeria monocytogenes</i> FSL N3-165                                   | 1334             | 254829042 |                      |                      |
|                      | <i>Listeria monocytogenes</i> FSL R2-503                                   | 1334             | 254854201 |                      |                      |
|                      | <i>Listeria monocytogenes</i> str. 1/2a F6854                              | 1334             | 47097148  |                      |                      |
| 1                    | <i>Streptococcus agalactiae</i> 2603V/R                                    | 1370             | 22537057  |                      | Type II-A            |
|                      | <i>Streptococcus agalactiae</i> 515                                        | 1377             | 77413160  |                      |                      |
|                      | <i>Streptococcus agalactiae</i> A909                                       | 1370             | 76788458  |                      |                      |
|                      | <i>Streptococcus agalactiae</i> ATCC 13813                                 | 1378             | 339301617 |                      |                      |
|                      | <i>Streptococcus agalactiae</i> CJB111                                     | 1370             | 77411010  |                      |                      |
|                      | <i>Streptococcus agalactiae</i> COH1                                       | 1370             | 77407964  |                      |                      |
|                      | <i>Streptococcus agalactiae</i> FSL S3-026                                 | 1370             | 417005168 |                      |                      |
|                      | <i>Streptococcus agalactiae</i> GB00112                                    | 1370             | 421147428 |                      |                      |
|                      | <i>Streptococcus agalactiae</i> H36B                                       | 1370             | 77405721  |                      |                      |
|                      | <i>Streptococcus agalactiae</i> NEM316                                     | 1377             | 25010965  |                      |                      |
|                      | <i>Streptococcus agalactiae</i> SA20-06                                    | 1370             | 410594450 |                      |                      |
|                      | <i>Streptococcus agalactiae</i> STIR-CD-17                                 | 1370             | 421532069 |                      |                      |
|                      | <i>Streptococcus anginosus</i> F0211                                       | 1345             | 315223162 |                      |                      |
|                      | <i>Streptococcus anginosus</i> SK1138                                      | 1386             | 421490579 |                      |                      |
|                      | <i>Streptococcus anginosus</i> SK52 = DSM 20563                            | 1396             | 335031483 |                      |                      |
|                      | <i>Streptococcus bovis</i> ATCC 700338                                     | 1373             | 306833855 |                      |                      |
|                      | <i>Streptococcus canis</i> FSL Z3-227                                      | 1375             | 392329410 |                      |                      |
|                      | <i>Streptococcus constellatus</i> subsp. <i>constellatus</i> SK53          | 1345             | 418965022 |                      |                      |
|                      | <i>Streptococcus dysgalactiae</i> subsp. <i>equisimilis</i> AC-2713        | 1371             | 410494913 |                      |                      |
|                      | <i>Streptococcus dysgalactiae</i> subsp. <i>equisimilis</i> ATCC 12394     | 1371             | 386317166 |                      |                      |
|                      | <i>Streptococcus dysgalactiae</i> subsp. <i>equisimilis</i> GGS_124        | 1371             | 251782637 |                      |                      |
|                      | <i>Streptococcus dysgalactiae</i> subsp. <i>equisimilis</i> RE378          | 1371             | 408401787 |                      |                      |
|                      | <i>Streptococcus equi</i> subsp. <i>zooepidemicus</i> MGCS10565            | 1348             | 195978435 |                      |                      |
|                      | <i>Streptococcus equinus</i> ATCC 9812                                     | 1377             | 320547102 |                      |                      |
|                      | <i>Streptococcus gallolyticus</i> subsp. <i>gallolyticus</i> ATCC BAA-2069 | 1370             | 325978669 |                      |                      |
|                      | <i>Streptococcus gallolyticus</i> subsp. <i>gallolyticus</i> TX20005       | 1370             | 306831733 |                      |                      |
|                      | <i>Streptococcus gallolyticus</i> UCN34                                    | 1371             | 288905639 |                      |                      |
|                      | <i>Streptococcus infantarius</i> subsp. <i>infantarius</i> CJ18            | 1375             | 379705580 |                      |                      |
|                      | <i>Streptococcus iniae</i> 9117                                            | 1368             | 406658208 |                      |                      |
|                      | <i>Streptococcus macacae</i> NCTC 11558                                    | 1338             | 357636406 |                      |                      |

| Cluster <sup>a</sup> | Strain <sup>b</sup>                 | Cas9 length (aa) | Cas9 GI   | Cas1 GI <sup>c</sup> | Subtype <sup>d</sup> |
|----------------------|-------------------------------------|------------------|-----------|----------------------|----------------------|
|                      | <i>Streptococcus mitis</i> SK321    | 1392             | 307710946 |                      |                      |
|                      | <i>Streptococcus mutans</i> 11SSST2 | 1345             | 449165720 |                      |                      |
|                      | <i>Streptococcus mutans</i> 11SSST2 | 1345             | 449951835 |                      |                      |
|                      | <i>Streptococcus mutans</i> 11VS1   | 1345             | 449976542 |                      |                      |
|                      | <i>Streptococcus mutans</i> 14D     | 1345             | 450149988 |                      |                      |
|                      | <i>Streptococcus mutans</i> 15VF2   | 1355             | 449170557 |                      |                      |
|                      | <i>Streptococcus mutans</i> 15VF2   | 1355             | 449965974 |                      |                      |
|                      | <i>Streptococcus mutans</i> 1SM1    | 1345             | 449158457 |                      |                      |
|                      | <i>Streptococcus mutans</i> 1SM1    | 1345             | 449920643 |                      |                      |
|                      | <i>Streptococcus mutans</i> 24      | 1350             | 449247589 |                      |                      |
|                      | <i>Streptococcus mutans</i> 24      | 1350             | 450180942 |                      |                      |
|                      | <i>Streptococcus mutans</i> 2VS1    | 1345             | 449174812 |                      |                      |
|                      | <i>Streptococcus mutans</i> 2VS1    | 1345             | 449968746 |                      |                      |
|                      | <i>Streptococcus mutans</i> 3SN1    | 1345             | 449162653 |                      |                      |
|                      | <i>Streptococcus mutans</i> 3SN1    | 1345             | 449931425 |                      |                      |
|                      | <i>Streptococcus mutans</i> 4SM1    | 1345             | 449159838 |                      |                      |
|                      | <i>Streptococcus mutans</i> 4SM1    | 1345             | 449927152 |                      |                      |
|                      | <i>Streptococcus mutans</i> 4VF1    | 1345             | 449167132 |                      |                      |
|                      | <i>Streptococcus mutans</i> 4VF1    | 1345             | 449961027 |                      |                      |
|                      | <i>Streptococcus mutans</i> 5SM3    | 1345             | 449176693 |                      |                      |
|                      | <i>Streptococcus mutans</i> 5SM3    | 1345             | 449980571 |                      |                      |
|                      | <i>Streptococcus mutans</i> 66-2A   | 1359             | 449240165 |                      |                      |
|                      | <i>Streptococcus mutans</i> 66-2A   | 1359             | 450160342 |                      |                      |
|                      | <i>Streptococcus mutans</i> 8ID3    | 1345             | 449154769 |                      |                      |
|                      | <i>Streptococcus mutans</i> 8ID3    | 1345             | 449872064 |                      |                      |
|                      | <i>Streptococcus mutans</i> A19     | 1345             | 449187668 |                      |                      |
|                      | <i>Streptococcus mutans</i> A19     | 1345             | 450013175 |                      |                      |
|                      | <i>Streptococcus mutans</i> B       | 1345             | 450166294 |                      |                      |
|                      | <i>Streptococcus mutans</i> G123    | 1345             | 450029806 |                      |                      |
|                      | <i>Streptococcus mutans</i> GS-5    | 1345             | 397650022 |                      |                      |
| 1                    | <i>Streptococcus mutans</i> LJ23    | 1345             | 387785882 |                      | Type II-A            |
| (continued)          | <i>Streptococcus mutans</i> M21     | 1345             | 449194333 |                      |                      |
|                      | <i>Streptococcus mutans</i> M21     | 1345             | 450036249 |                      |                      |
|                      | <i>Streptococcus mutans</i> M230    | 1345             | 449260994 |                      |                      |
|                      | <i>Streptococcus mutans</i> M230    | 1345             | 449903532 |                      |                      |
|                      | <i>Streptococcus mutans</i> M2A     | 1345             | 449209586 |                      |                      |
|                      | <i>Streptococcus mutans</i> M2A     | 1345             | 450074072 |                      |                      |
|                      | <i>Streptococcus mutans</i> N29     | 1345             | 449182997 |                      |                      |
|                      | <i>Streptococcus mutans</i> N29     | 1345             | 450003067 |                      |                      |
|                      | <i>Streptococcus mutans</i> N3209   | 1345             | 449210660 |                      |                      |
|                      | <i>Streptococcus mutans</i> N3209   | 1345             | 450077860 |                      |                      |
|                      | <i>Streptococcus mutans</i> N66     | 1345             | 449212466 |                      |                      |
|                      | <i>Streptococcus mutans</i> N66     | 1345             | 450083993 |                      |                      |
|                      | <i>Streptococcus mutans</i> NFSM1   | 1350             | 449202104 |                      |                      |
|                      | <i>Streptococcus mutans</i> NFSM1   | 1350             | 450051112 |                      |                      |
|                      | <i>Streptococcus mutans</i> NLML1   | 1345             | 450140393 |                      |                      |
|                      | <i>Streptococcus mutans</i> NLML4   | 1338             | 449202681 |                      |                      |
|                      | <i>Streptococcus mutans</i> NLML4   | 1338             | 450059882 |                      |                      |
|                      | <i>Streptococcus mutans</i> NLML9   | 1345             | 449209148 |                      |                      |
|                      | <i>Streptococcus mutans</i> NLML9   | 1345             | 450066176 |                      |                      |
|                      | <i>Streptococcus mutans</i> NMT4863 | 1355             | 449186850 |                      |                      |
|                      | <i>Streptococcus mutans</i> NMT4863 | 1355             | 450007078 |                      |                      |
|                      | <i>Streptococcus mutans</i> NN2025  | 1345             | 290580220 |                      |                      |
|                      | <i>Streptococcus mutans</i> NV1996  | 1345             | 450086338 |                      |                      |
|                      | <i>Streptococcus mutans</i> NVAB    | 1345             | 449181424 |                      |                      |
|                      | <i>Streptococcus mutans</i> NVAB    | 1345             | 449990810 |                      |                      |
|                      | <i>Streptococcus mutans</i> R221    | 1345             | 449258042 |                      |                      |
|                      | <i>Streptococcus mutans</i> R221    | 1345             | 449899675 |                      |                      |
|                      | <i>Streptococcus mutans</i> S1B     | 1345             | 449251227 |                      |                      |
|                      | <i>Streptococcus mutans</i> S1B     | 1345             | 449877120 |                      |                      |
|                      | <i>Streptococcus mutans</i> SF1     | 1345             | 450098705 |                      |                      |
|                      | <i>Streptococcus mutans</i> SF14    | 1345             | 449221374 |                      |                      |



| Cluster <sup>a</sup>                                       | Strain <sup>b</sup>                                 | Cas9 length (aa)               | Cas9 GI          | Cas1 GI <sup>c</sup> | Subtype <sup>d</sup> |
|------------------------------------------------------------|-----------------------------------------------------|--------------------------------|------------------|----------------------|----------------------|
| 1<br>(continued)                                           | <i>Streptococcus mutans</i> SF14                    | 1345                           | 450107816        |                      |                      |
|                                                            | <i>Streptococcus mutans</i> SM1                     | 1345                           | 449245264        |                      |                      |
|                                                            | <i>Streptococcus mutans</i> SM1                     | 1345                           | 450176410        |                      |                      |
|                                                            | <i>Streptococcus mutans</i> SM4                     | 1345                           | 449246010        |                      |                      |
|                                                            | <i>Streptococcus mutans</i> SM4                     | 1345                           | 450170248        |                      |                      |
|                                                            | <i>Streptococcus mutans</i> SM6                     | 1345                           | 449223000        |                      |                      |
|                                                            | <i>Streptococcus mutans</i> SM6                     | 1345                           | 450112022        |                      |                      |
|                                                            | <i>Streptococcus mutans</i> ST6                     | 1350                           | 449227252        |                      |                      |
|                                                            | <i>Streptococcus mutans</i> ST6                     | 1350                           | 450123011        |                      |                      |
|                                                            | <b><i>Streptococcus mutans</i> UA159</b>            | <b>1345</b>                    | <b>24379809</b>  | <b>24379808</b>      |                      |
|                                                            | <i>Streptococcus mutans</i> W6                      | 1345                           | 450094364        |                      |                      |
|                                                            | <i>Streptococcus oralis</i> SK304                   | 1373                           | 421488030        |                      |                      |
|                                                            | <i>Streptococcus oralis</i> SK610                   | 1371                           | 419782534        |                      |                      |
|                                                            | <i>Streptococcus pseudoporcinus</i> LQ 940-04       | 1374                           | 416852857        |                      |                      |
|                                                            | <b><i>Streptococcus pyogenes</i> SF370 (M1 GAS)</b> | <b>1368</b>                    | <b>13622193</b>  | <b>13622194</b>      |                      |
|                                                            | <i>Streptococcus pyogenes</i> MGAS10270             | 1368                           | 94543903         |                      |                      |
|                                                            | <i>Streptococcus pyogenes</i> MGAS10750             | 1371                           | 94994317         |                      |                      |
|                                                            | <i>Streptococcus pyogenes</i> MGAS15252             | 1367                           | 383479946        |                      |                      |
|                                                            | <i>Streptococcus pyogenes</i> MGAS2096              | 1368                           | 94992340         |                      |                      |
|                                                            | <i>Streptococcus pyogenes</i> MGAS315               | 1368                           | 21910213         |                      | Type II-A            |
|                                                            | <i>Streptococcus pyogenes</i> MGAS5005              | 1368                           | 71910582         |                      |                      |
|                                                            | <i>Streptococcus pyogenes</i> MGAS6180              | 1368                           | 71903413         |                      |                      |
|                                                            | <i>Streptococcus pyogenes</i> MGAS9429              | 1368                           | 94988516         |                      |                      |
|                                                            | <i>Streptococcus pyogenes</i> NZ131                 | 1368                           | 209559356        |                      |                      |
|                                                            | <i>Streptococcus pyogenes</i> SSI-1                 | 1368                           | 28896088         |                      |                      |
|                                                            | <i>Streptococcus rattus</i> FA-1 = DSM 20564        | 1370                           | 400290495        |                      |                      |
|                                                            | <i>Streptococcus salivarius</i> K12                 | 1385                           | 421452908        |                      |                      |
|                                                            | <i>Streptococcus sanguinis</i> SK115                | 1377                           | 422848603        |                      |                      |
|                                                            | <i>Streptococcus sanguinis</i> SK330                | 1392                           | 422860049        |                      |                      |
|                                                            | <i>Streptococcus sanguinis</i> SK353                | 1370                           | 422821159        |                      |                      |
|                                                            | <i>Streptococcus</i> sp. C300                       | 1377                           | 322375978        |                      |                      |
|                                                            | <i>Streptococcus</i> sp. F0441                      | 1371                           | 414157437        |                      |                      |
|                                                            | <i>Streptococcus</i> sp. M334                       | 1375                           | 322378004        |                      |                      |
|                                                            | <i>Streptococcus</i> sp. oral taxon 56 str. F0418   | 1371                           | 339640839        |                      |                      |
|                                                            | <i>Streptococcus suis</i> ST1                       | 1381                           | 389856936        |                      |                      |
|                                                            | <i>Streptococcus thermophilus</i>                   | 1388                           | 343794781        |                      |                      |
|                                                            | <b><i>Streptococcus thermophilus</i> LMD-9</b>      | <b>1388</b>                    | <b>116628213</b> | <b>116628212</b>     |                      |
|                                                            | <i>Streptococcus thermophilus</i> MN-ZLW-002        | 1388                           | 387910220        |                      |                      |
|                                                            | <i>Streptococcus thermophilus</i> ND03              | 1388                           | 386087120        |                      |                      |
|                                                            | 2                                                   | <i>Campylobacter coli</i> 1098 | 984              | 419564797            |                      |
| <i>Campylobacter coli</i> 111-3                            |                                                     | 984                            | 419536531        |                      |                      |
| <i>Campylobacter coli</i> 132-6                            |                                                     | 987                            | 419572019        |                      |                      |
| <i>Campylobacter coli</i> 151-9                            |                                                     | 984                            | 419603415        |                      |                      |
| <i>Campylobacter coli</i> 1909                             |                                                     | 984                            | 419576091        |                      |                      |
| <i>Campylobacter coli</i> 1957                             |                                                     | 965                            | 419581876        |                      |                      |
| <i>Campylobacter coli</i> 2692                             |                                                     | 984                            | 419553162        |                      |                      |
| <i>Campylobacter coli</i> 59-2                             |                                                     | 984                            | 419578074        |                      |                      |
| <i>Campylobacter coli</i> 67-8                             |                                                     | 965                            | 419587721        |                      |                      |
| <i>Campylobacter coli</i> 80352                            |                                                     | 965                            | 419558307        |                      |                      |
| <i>Campylobacter coli</i> 80352                            |                                                     | 987                            | 419559505        |                      |                      |
| <i>Campylobacter jejuni</i> subsp. <i>doylei</i> 269.97    |                                                     | 984                            | 153952471        |                      | Type II-C            |
| <i>Campylobacter jejuni</i> subsp. <i>jejuni</i> 110-21    |                                                     | 987                            | 419676124        |                      |                      |
| <i>Campylobacter jejuni</i> subsp. <i>jejuni</i> 129-258   |                                                     | 987                            | 419619138        |                      |                      |
| <i>Campylobacter jejuni</i> subsp. <i>jejuni</i> 1336      |                                                     | 987                            | 283956897        |                      |                      |
| <i>Campylobacter jejuni</i> subsp. <i>jejuni</i> 140-16    |                                                     | 984                            | 419681578        |                      |                      |
| <i>Campylobacter jejuni</i> subsp. <i>jejuni</i> 1577      |                                                     | 984                            | 419685099        |                      |                      |
| <i>Campylobacter jejuni</i> subsp. <i>jejuni</i> 1854      |                                                     | 987                            | 419689467        |                      |                      |
| <i>Campylobacter jejuni</i> subsp. <i>jejuni</i> 1997-10   |                                                     | 984                            | 419666522        |                      |                      |
| <i>Campylobacter jejuni</i> subsp. <i>jejuni</i> 2008-1025 |                                                     | 987                            | 419650041        |                      |                      |
| <i>Campylobacter jejuni</i> subsp. <i>jejuni</i> 2008-872  |                                                     | 984                            | 419654778        |                      |                      |
| <i>Campylobacter jejuni</i> subsp. <i>jejuni</i> 2008-979  |                                                     | 987                            | 419660762        |                      |                      |
| <i>Campylobacter jejuni</i> subsp. <i>jejuni</i> 2008-988  |                                                     | 965                            | 419656328        |                      |                      |

| Cluster <sup>a</sup>                   | Strain <sup>b</sup>                                                | Cas9 length (aa) | Cas9 GI          | Cas1 GI <sup>c</sup> | Subtype <sup>d</sup> |
|----------------------------------------|--------------------------------------------------------------------|------------------|------------------|----------------------|----------------------|
| 2<br>(continued)                       | <i>Campylobacter jejuni</i> subsp. <i>jejuni</i> 2008-988          | 984              | 419655317        |                      |                      |
|                                        | <i>Campylobacter jejuni</i> subsp. <i>jejuni</i> 260.94            | 961              | 86152042         |                      |                      |
|                                        | <i>Campylobacter jejuni</i> subsp. <i>jejuni</i> 414               | 985              | 283953849        |                      |                      |
|                                        | <i>Campylobacter jejuni</i> subsp. <i>jejuni</i> 51037             | 984              | 419674189        |                      |                      |
|                                        | <i>Campylobacter jejuni</i> subsp. <i>jejuni</i> 51494             | 984              | 419619463        |                      |                      |
|                                        | <i>Campylobacter jejuni</i> subsp. <i>jejuni</i> 53161             | 987              | 419647275        |                      |                      |
|                                        | <i>Campylobacter jejuni</i> subsp. <i>jejuni</i> 60004             | 984              | 419629136        |                      |                      |
|                                        | <i>Campylobacter jejuni</i> subsp. <i>jejuni</i> 81116             | 984              | 157415744        |                      |                      |
|                                        | <i>Campylobacter jejuni</i> subsp. <i>jejuni</i> 84-25             | 984              | 88596565         |                      |                      |
|                                        | <i>Campylobacter jejuni</i> subsp. <i>jejuni</i> 87459             | 984              | 419680124        |                      |                      |
|                                        | <i>Campylobacter jejuni</i> subsp. <i>jejuni</i> ATCC 33560        | 984              | 419643715        |                      |                      |
|                                        | <i>Campylobacter jejuni</i> subsp. <i>jejuni</i> CF93-6            | 987              | 86149266         |                      |                      |
|                                        | <i>Campylobacter jejuni</i> subsp. <i>jejuni</i> CG8486            | 984              | 148925683        |                      |                      |
|                                        | <i>Campylobacter jejuni</i> subsp. <i>jejuni</i> HB93-13           | 984              | 86152450         |                      |                      |
|                                        | <i>Campylobacter jejuni</i> subsp. <i>jejuni</i> LMG 23210         | 987              | 419696801        |                      | Type II-C            |
|                                        | <i>Campylobacter jejuni</i> subsp. <i>jejuni</i> LMG 23211         | 984              | 419697443        |                      |                      |
|                                        | <i>Campylobacter jejuni</i> subsp. <i>jejuni</i> LMG 23263         | 984              | 419628620        |                      |                      |
|                                        | <i>Campylobacter jejuni</i> subsp. <i>jejuni</i> LMG 23264         | 984              | 419632476        |                      |                      |
|                                        | <i>Campylobacter jejuni</i> subsp. <i>jejuni</i> LMG 23269         | 987              | 419634246        |                      |                      |
|                                        | <i>Campylobacter jejuni</i> subsp. <i>jejuni</i> LMG 23357         | 987              | 419641132        |                      |                      |
|                                        | <b><i>Campylobacter jejuni</i> subsp. <i>jejuni</i> NCTC 11168</b> | <b>984</b>       | <b>218563121</b> | <b>218563120</b>     |                      |
|                                        | <i>Campylobacter jejuni</i> subsp. <i>jejuni</i> NW                | 983              | 424845990        |                      |                      |
|                                        | <i>Campylobacter jejuni</i> subsp. <i>jejuni</i> PT14              | 987              | 407942868        |                      |                      |
|                                        | <i>Campylobacter lari</i>                                          | 1003             | 345468028        |                      |                      |
|                                        | <i>Helicobacter canadensis</i> MIT 98-5491                         | 1007             | 253828136        |                      |                      |
|                                        | <i>Helicobacter cinaedi</i> ATCC BAA-847                           | 1023             | 396079277        |                      |                      |
| <i>Helicobacter cinaedi</i> CCUG 18818 | 1023                                                               | 313144862        |                  |                      |                      |
| <i>Helicobacter cinaedi</i> PAGU611    | 1023                                                               | 386762035        |                  |                      |                      |
| 3                                      | <i>Catelicoccus marimammalium</i> M35/04/3                         | 1140             | 424780480        |                      |                      |
|                                        | <i>Lactobacillus farciminis</i> KCTC 3681                          | 1126             | 336394701        |                      |                      |
|                                        | <i>Listeriaceae bacterium</i> TTU M1-001                           | 1087             | 381184145        |                      |                      |
|                                        | <i>Streptococcus anginosus</i> 1_2_62CV                            | 1125             | 319939170        |                      |                      |
|                                        | <i>Streptococcus gallolyticus</i> UCN34                            | 1130             | 288905632        |                      |                      |
|                                        | <i>Streptococcus gordonii</i> str. Challis substr. CH1             | 1136             | 157150687        |                      |                      |
|                                        | <i>Streptococcus infantarius</i> ATCC BAA-102                      | 1129             | 171779984        |                      |                      |
|                                        | <i>Streptococcus macedonicus</i> ACA-DC 198                        | 1130             | 374338350        |                      |                      |
|                                        | <i>Streptococcus mitis</i> ATCC 6249                               | 1134             | 306829274        |                      |                      |
|                                        | <i>Streptococcus mutans</i> NLML5                                  | 1128             | 449203378        |                      |                      |
|                                        | <i>Streptococcus mutans</i> NLML5                                  | 1128             | 450064617        |                      |                      |
|                                        | <i>Streptococcus mutans</i> NLML8                                  | 1125             | 449151037        |                      |                      |
|                                        | <i>Streptococcus mutans</i> NLML8                                  | 1125             | 450133520        |                      |                      |
|                                        | <i>Streptococcus mutans</i> ST1                                    | 1134             | 449228751        |                      |                      |
|                                        | <i>Streptococcus mutans</i> ST1                                    | 1134             | 450114718        |                      |                      |
|                                        | <i>Streptococcus mutans</i> U2A                                    | 1125             | 449232458        |                      |                      |
|                                        | <i>Streptococcus mutans</i> U2A                                    | 1125             | 450125471        |                      |                      |
|                                        | <i>Streptococcus oralis</i> SK1074                                 | 1121             | 418974877        |                      | Type II-A            |
|                                        | <i>Streptococcus oralis</i> SK313                                  | 1134             | 417940002        |                      |                      |
|                                        | <i>Streptococcus parasanguinis</i> F0449                           | 1140             | 419799964        |                      |                      |
|                                        | <i>Streptococcus pasteurianus</i> ATCC 43144                       | 1130             | 336064611        |                      |                      |
|                                        | <i>Streptococcus salivarius</i> JIM8777                            | 1127             | 387783792        |                      |                      |
|                                        | <i>Streptococcus salivarius</i> PS4                                | 1135             | 419707401        |                      |                      |
|                                        | <i>Streptococcus</i> sp. BS35b                                     | 1026             | 401684660        |                      |                      |
|                                        | <i>Streptococcus</i> sp. C150                                      | 1139             | 322372617        |                      |                      |
|                                        | <i>Streptococcus</i> sp. GMD6S                                     | 1121             | 406576934        |                      |                      |
|                                        | <i>Streptococcus suis</i> 89/1591                                  | 1122             | 223932525        |                      |                      |
|                                        | <i>Streptococcus suis</i> D9                                       | 1122             | 386584496        |                      |                      |
|                                        | <i>Streptococcus suis</i> ST3                                      | 1122             | 330833104        |                      |                      |
|                                        | <i>Streptococcus thermophilus</i> CNRZ1066                         | 1128             | 55822627         |                      |                      |
|                                        | <i>Streptococcus thermophilus</i> JIM 8232                         | 1121             | 386344353        |                      |                      |
|                                        | <b><i>Streptococcus thermophilus</i> LMD-9</b>                     | <b>1121</b>      | <b>116627542</b> | <b>116627543</b>     |                      |
|                                        | <i>Streptococcus thermophilus</i> LMG 18311                        | 1122             | 55820735         |                      |                      |
|                                        | <i>Streptococcus thermophilus</i> MN-ZLW-002                       | 1121             | 387909441        |                      |                      |

| Cluster <sup>a</sup>                                                  | Strain <sup>b</sup>                                                    | Cas9 length (aa) | Cas9 GI          | Cas1 GI <sup>c</sup> | Subtype <sup>d</sup> |
|-----------------------------------------------------------------------|------------------------------------------------------------------------|------------------|------------------|----------------------|----------------------|
| 3<br>(continued)                                                      | <i>Streptococcus thermophilus</i> MTCC 5460                            | 1122             | 445374534        |                      | Type II-A            |
|                                                                       | <i>Streptococcus thermophilus</i> ND03                                 | 1121             | 386086348        |                      |                      |
|                                                                       | <i>Streptococcus vestibularis</i> ATCC 49124                           | 1128             | 322517104        |                      |                      |
| 4                                                                     | <i>Actinobacillus minor</i> NM305                                      | 1056             | 240949037        |                      | Type II-C            |
|                                                                       | <i>Actinobacillus pleuropneumoniae</i> serovar 10 str. D13039          | 1054             | 307256472        |                      |                      |
|                                                                       | <i>Actinobacillus succinogenes</i> 130Z                                | 1062             | 152978060        |                      |                      |
|                                                                       | <i>Actinobacillus suis</i> H91-0380                                    | 1054             | 407692091        |                      |                      |
|                                                                       | <i>Haemophilus parainfluenzae</i> ATCC 33392                           | 1054             | 325578067        |                      |                      |
|                                                                       | <i>Haemophilus parainfluenzae</i> CUG 13788                            | 1052             | 359298684        |                      |                      |
|                                                                       | <i>Haemophilus parainfluenzae</i> T3T1                                 | 1052             | 345430422        |                      |                      |
|                                                                       | <i>Haemophilus sputorum</i> HK 2154                                    | 1052             | 402304649        |                      |                      |
|                                                                       | <i>Kingella kingae</i> PYKK081                                         | 1060             | 381401699        |                      |                      |
|                                                                       | <i>Neisseria bacilliformis</i> ATCC BAA-1200                           | 1077             | 329117879        |                      |                      |
|                                                                       | <i>Neisseria cinerea</i> ATCC 14685                                    | 1082             | 261378287        |                      |                      |
|                                                                       | <i>Neisseria flavescens</i> SK114                                      | 1081             | 241759613        |                      |                      |
|                                                                       | <i>Neisseria lactamica</i> 020-06                                      | 1082             | 313669044        |                      |                      |
|                                                                       | <i>Neisseria meningitidis</i> 053442                                   | 1082             | 161869390        |                      |                      |
|                                                                       | <i>Neisseria meningitidis</i> 2007056                                  | 1082             | 433531983        |                      |                      |
|                                                                       | <i>Neisseria meningitidis</i> 63049                                    | 1082             | 433514137        |                      |                      |
|                                                                       | <i>Neisseria meningitidis</i> 8013                                     | 1082             | 385324780        |                      |                      |
|                                                                       | <i>Neisseria meningitidis</i> 92045                                    | 1082             | 421559784        |                      |                      |
|                                                                       | <i>Neisseria meningitidis</i> 93003                                    | 1081             | 421538794        |                      |                      |
|                                                                       | <i>Neisseria meningitidis</i> 93004                                    | 1081             | 421541126        |                      |                      |
|                                                                       | <i>Neisseria meningitidis</i> 96023                                    | 1082             | 433518260        |                      |                      |
|                                                                       | <i>Neisseria meningitidis</i> 98008                                    | 1081             | 421555531        |                      |                      |
|                                                                       | <i>Neisseria meningitidis</i> alpha14                                  | 1082             | 254804356        |                      |                      |
|                                                                       | <i>Neisseria meningitidis</i> alpha275                                 | 1082             | 254672046        |                      |                      |
|                                                                       | <i>Neisseria meningitidis</i> ATCC 13091                               | 1082             | 304388355        |                      |                      |
|                                                                       | <i>Neisseria meningitidis</i> N1568                                    | 1081             | 416164244        |                      |                      |
|                                                                       | <i>Neisseria meningitidis</i> NM140                                    | 1081             | 421545139        |                      |                      |
|                                                                       | <i>Neisseria meningitidis</i> NM220                                    | 1082             | 418291220        |                      |                      |
|                                                                       | <i>Neisseria meningitidis</i> NM233                                    | 1082             | 418288950        |                      |                      |
|                                                                       | <i>Neisseria meningitidis</i> WUE 2594                                 | 1082             | 385337435        |                      |                      |
|                                                                       | <b><i>Neisseria meningitidis</i> Z2491</b>                             | <b>1082</b>      | <b>218767588</b> | <b>218767587</b>     |                      |
|                                                                       | <i>Neisseria</i> sp. oral taxon 14 str. F0314                          | 1089             | 298369677        |                      |                      |
| <i>Neisseria wadsworthii</i> 9715                                     | 1097                                                                   | 350570326        |                  |                      |                      |
| <i>Pasteurella multocida</i> subsp. <i>gallicida</i> X73              | 1058                                                                   | 425063822        |                  |                      |                      |
| <i>Pasteurella multocida</i> subsp. <i>multocida</i> str. P52VAC      | 1056                                                                   | 421263876        |                  |                      |                      |
| <b><i>Pasteurella multocida</i> subsp. <i>multocida</i> str. Pm70</b> | <b>1056</b>                                                            | <b>15602992</b>  | <b>15602991</b>  |                      |                      |
| <i>Simonsiella muelleri</i> ATCC 29453                                | 1063                                                                   | 404379108        |                  |                      |                      |
| 5                                                                     | <i>Lactobacillus brevis</i> subsp. <i>gravesensis</i> ATCC 27305       | 1377             | 227509761        |                      | Type II-A            |
|                                                                       | <i>Lactobacillus buchneri</i> CD034                                    | 1371             | 406027703        |                      |                      |
|                                                                       | <i>Lactobacillus buchneri</i> NRRL B-30929                             | 1371             | 331702228        |                      |                      |
|                                                                       | <i>Lactobacillus casei</i> BL23                                        | 1361             | 191639137        |                      |                      |
|                                                                       | <i>Lactobacillus casei</i> Lc-10                                       | 1361             | 418010298        |                      |                      |
|                                                                       | <i>Lactobacillus casei</i> M36                                         | 1363             | 417996992        |                      |                      |
|                                                                       | <i>Lactobacillus casei</i> str. Zhang                                  | 1361             | 301067199        |                      |                      |
|                                                                       | <i>Lactobacillus casei</i> T71499                                      | 1360             | 417999832        |                      |                      |
|                                                                       | <i>Lactobacillus casei</i> UCD174                                      | 1366             | 418002962        |                      |                      |
|                                                                       | <i>Lactobacillus casei</i> W56                                         | 1389             | 409997999        |                      |                      |
|                                                                       | <i>Lactobacillus coryniformis</i> subsp. <i>coryniformis</i> KCTC 3167 | 1354             | 333394446        |                      |                      |
|                                                                       | <i>Lactobacillus curvatus</i> CRL 705                                  | 1368             | 354808135        |                      |                      |
|                                                                       | <i>Lactobacillus fermentum</i> 28-3-CHN                                | 1313             | 260662220        |                      |                      |
|                                                                       | <i>Lactobacillus fermentum</i> ATCC 14931                              | 1381             | 227514633        |                      |                      |
|                                                                       | <i>Lactobacillus florum</i> 2F                                         | 1327             | 408790128        |                      |                      |
|                                                                       | <i>Lactobacillus gasserii</i> JV-V03                                   | 1391             | 300361537        |                      |                      |
|                                                                       | <i>Lactobacillus hominis</i> CRBIP 24.179                              | 1386             | 395244248        |                      |                      |
|                                                                       | <i>Lactobacillus jensenii</i> 269-3                                    | 1391             | 238854567        |                      |                      |
|                                                                       | <i>Lactobacillus jensenii</i> 27-2-CHN                                 | 1395             | 256852176        |                      |                      |
|                                                                       | <i>Lactobacillus johnsonii</i> DPC 6026                                | 1375             | 385826041        |                      |                      |
| <i>Lactobacillus mucosae</i> LM1                                      | 1382                                                                   | 377831443        |                  |                      |                      |
| <i>Lactobacillus paracasei</i> subsp. <i>paracasei</i> 8700:2         | 1362                                                                   | 239630053        |                  |                      |                      |

| Cluster <sup>a</sup>                            | Strain <sup>b</sup>                                            | Cas9 length (aa) | Cas9 GI          | Cas1 GI <sup>c</sup> | Subtype <sup>d</sup> |
|-------------------------------------------------|----------------------------------------------------------------|------------------|------------------|----------------------|----------------------|
| 5<br>(continued)                                | <i>Lactobacillus pentosus</i> IG1                              | 1382             | 339637353        |                      |                      |
|                                                 | <i>Lactobacillus pentosus</i> KCA1                             | 1361             | 392947436        |                      |                      |
|                                                 | <i>Lactobacillus pentosus</i> MP-10                            | 1358             | 334881121        |                      |                      |
|                                                 | <i>Lactobacillus plantarum</i> ZJ316                           | 1358             | 448819853        |                      |                      |
|                                                 | <b><i>Lactobacillus rhamnosus</i> GG</b>                       | <b>1363</b>      | <b>258509199</b> | <b>258509198</b>     |                      |
|                                                 | <i>Lactobacillus rhamnosus</i> HN001                           | 1361             | 199597394        |                      |                      |
|                                                 | <i>Lactobacillus rhamnosus</i> R0011                           | 1361             | 418072660        |                      |                      |
|                                                 | <i>Lactobacillus ruminis</i> ATCC 25644                        | 1375             | 323340068        |                      | Type II-A            |
|                                                 | <i>Lactobacillus salivarius</i> SMXD51                         | 1339             | 418960525        |                      |                      |
|                                                 | <i>Lactobacillus sanfranciscensis</i> TMW 1.1304               | 1331             | 347534532        |                      |                      |
|                                                 | <i>Lactobacillus</i> sp. 66c                                   | 1419             | 408410332        |                      |                      |
|                                                 | <i>Pediococcus acidilactici</i> DSM 20284                      | 1364             | 304386254        |                      |                      |
|                                                 | <i>Pediococcus acidilactici</i> MA18/5M                        | 1366             | 418068659        |                      |                      |
| <i>Psychroflexus torquus</i> ATCC 700755        | 1509                                                           | 408489713        |                  |                      |                      |
| 6                                               | <i>Anaerophaga</i> sp. HS1                                     | 1552             | 371776944        |                      |                      |
|                                                 | <i>Anaerophaga thermohalophila</i> DSM 12881                   | 1515             | 346224232        |                      |                      |
|                                                 | <i>Bacteroides coprophilus</i> DSM 18228                       | 1509             | 224026357        |                      |                      |
|                                                 | <i>Bacteroides coprosuis</i> DSM 18011                         | 1504             | 333031006        |                      |                      |
|                                                 | <i>Bacteroides dorei</i> DSM 17855                             | 1504             | 212694363        |                      |                      |
|                                                 | <i>Bacteroides eggerthii</i> 1_2_48FAA                         | 1509             | 317474201        |                      |                      |
|                                                 | <i>Bacteroides faecis</i> 27-5                                 | 1526             | 380696107        |                      |                      |
|                                                 | <i>Bacteroides fluxus</i> YIT 12057                            | 1509             | 329965125        |                      |                      |
|                                                 | <i>Bacteroides nordii</i> CL02T12C05                           | 1512             | 393788929        |                      |                      |
|                                                 | <b><i>Bacteroides</i> sp. 20_3</b>                             | <b>1517</b>      | <b>301311869</b> | <b>301311870</b>     | Type II-C            |
|                                                 | <i>Bacteroides</i> sp. D2                                      | 1510             | 383115507        |                      |                      |
|                                                 | <i>Bacteroides uniformis</i> CL03T00C23                        | 1508             | 423303159        |                      |                      |
|                                                 | <i>Bacteroides vulgatus</i> CL09T03C04                         | 1504             | 423312075        |                      |                      |
|                                                 | <i>Capnocytophaga gingivalis</i> ATCC 33624                    | 1436             | 228473057        |                      |                      |
|                                                 | <i>Capnocytophaga</i> sp. CM59                                 | 1437             | 402830627        |                      |                      |
|                                                 | <i>Capnocytophaga</i> sp. oral taxon 324 str. F0483            | 1471             | 429756885        |                      |                      |
|                                                 | <i>Capnocytophaga</i> sp. oral taxon 326 str. F0382            | 1450             | 429752492        |                      |                      |
|                                                 | <i>Capnocytophaga</i> sp. oral taxon 412 str. F0487            | 1450             | 393778597        |                      |                      |
|                                                 | <i>Chryseobacterium</i> sp. CF314                              | 1419             | 399023756        |                      |                      |
|                                                 | <i>Fibrobacter succinogenes</i> subsp. <i>succinogenes</i> S85 | 1512             | 261414553        |                      |                      |
|                                                 | <i>Flavobacteriaceae</i> bacterium S85                         | 1516             | 372210605        |                      |                      |
|                                                 | <i>Flavobacterium columnare</i> ATCC 49512                     | 1459             | 365960762        |                      |                      |
|                                                 | <i>Fluviicola taffensis</i> DSM 16823                          | 1458             | 327405121        |                      |                      |
|                                                 | <i>Mucilagibacter paludis</i> DSM 18603                        | 1473             | 373954054        |                      |                      |
|                                                 | <i>Myroides odoratus</i> DSM 2801                              | 1466             | 374597806        |                      |                      |
|                                                 | <i>Ornithobacterium rhinotracheale</i> DSM 15997               | 1535             | 392391493        |                      |                      |
|                                                 | <i>Prevotella bivia</i> JCVIHMP010                             | 1485             | 282858617        |                      | Type II-C            |
|                                                 | <i>Prevotella buccae</i> ATCC 33574                            | 1457             | 315607525        |                      |                      |
|                                                 | <i>Prevotella nigrescens</i> ATCC 33563                        | 1506             | 340351024        |                      |                      |
|                                                 | <i>Prevotella</i> sp. MSX73                                    | 1483             | 402307189        |                      |                      |
|                                                 | <i>Prevotella timonensis</i> CRIS 5C-B1                        | 1487             | 282881485        |                      |                      |
|                                                 | <i>Prevotella veroralis</i> F0319                              | 1496             | 260592128        |                      |                      |
| <i>Sphingobacterium spiritivorum</i> ATCC 33861 | 1426                                                           | 300771242        |                  |                      |                      |
| <i>Weeksella virosa</i> DSM 16922               | 1440                                                           | 325955459        |                  |                      |                      |
| 7                                               | <i>Bacteroides fragilis</i> 638R                               | 1436             | 375360193        |                      |                      |
|                                                 | <b><i>Bacteroides fragilis</i> NCTC 9343</b>                   | <b>1436</b>      | <b>60683389</b>  | <b>60683388</b>      |                      |
|                                                 | <i>Bacteroides</i> sp. 2_1_16                                  | 1436             | 265767599        |                      |                      |
|                                                 | <i>Bacteroides</i> sp. 3_1_19                                  | 1424             | 298377533        |                      |                      |
|                                                 | <i>Bacteroides</i> sp. D2                                      | 1436             | 383110723        |                      |                      |
|                                                 | <i>Bacteroidetes</i> oral taxon 274 str. F0058                 | 1434             | 298373376        |                      |                      |
|                                                 | <i>Belliella baltica</i> DSM 15883                             | 1352             | 390944707        |                      |                      |
|                                                 | <i>Bergeyella zoohelcum</i> CCUG 30536                         | 1430             | 406673990        |                      | Type II-C            |
|                                                 | <i>Capnocytophaga canimorsus</i> Cc5                           | 1430             | 340622236        |                      |                      |
|                                                 | <i>Capnocytophaga ochracea</i> DSM 7271                        | 1426             | 256819408        |                      |                      |
|                                                 | <i>Capnocytophaga</i> sp. oral taxon 329 str. F0087            | 1435             | 332882466        |                      |                      |
|                                                 | <i>Capnocytophaga</i> sp. oral taxon 335 str. F0486            | 1426             | 420149252        |                      |                      |
|                                                 | <i>Capnocytophaga</i> sp. oral taxon 380 str. F0488            | 1432             | 429748017        |                      |                      |
|                                                 | <i>Capnocytophaga sputigena</i> Capno                          | 1426             | 213962376        |                      |                      |

| Cluster <sup>a</sup>                                                     | Strain <sup>b</sup>                                            | Cas9 length (aa)                        | Cas9 GI          | Cas1 GI <sup>c</sup> | Subtype <sup>d</sup> |
|--------------------------------------------------------------------------|----------------------------------------------------------------|-----------------------------------------|------------------|----------------------|----------------------|
| 7<br>(continued)                                                         | <i>Flavobacterium psychrophilum</i> JIP02/86                   | 1354                                    | 150025575        |                      |                      |
|                                                                          | <i>Galbibacter</i> sp. ck-12-15                                | 1391                                    | 408370397        |                      |                      |
|                                                                          | <i>Indibacter alkaliphilus</i> LW1                             | 1354                                    | 404451234        |                      |                      |
|                                                                          | <i>Joostella marina</i> DSM 19592                              | 1397                                    | 386818981        |                      |                      |
|                                                                          | <i>Kordia algicida</i> OT-1                                    | 1391                                    | 163754820        |                      |                      |
|                                                                          | <i>Marinilabilia</i> sp. AK2                                   | 1345                                    | 410030899        |                      |                      |
|                                                                          | <i>Myroides injenensis</i> M09-0166                            | 1401                                    | 399927444        |                      |                      |
|                                                                          | <i>Niabella soli</i> DSM 19437                                 | 1426                                    | 374372722        |                      |                      |
|                                                                          | <i>Parabacteroides johnsonii</i> DSM 18315                     | 1443                                    | 218258638        |                      |                      |
|                                                                          | <i>Parabacteroides</i> sp. D13                                 | 1424                                    | 256840409        |                      | Type II-C            |
|                                                                          | <i>Prevotella histicola</i> F0411                              | 1375                                    | 357042839        |                      |                      |
|                                                                          | <i>Prevotella intermedia</i> 17                                | 1380                                    | 387132277        |                      |                      |
|                                                                          | <i>Prevotella nigrescens</i> F0103                             | 1380                                    | 445119230        |                      |                      |
|                                                                          | <i>Prevotella oralis</i> ATCC 33269                            | 1391                                    | 323344874        |                      |                      |
|                                                                          | <i>Prevotella</i> sp. oral taxon 306 str. F0472                | 1375                                    | 383811446        |                      |                      |
|                                                                          | <i>Riemerella anatipestifer</i> RA-CH-1                        | 1405                                    | 407451859        |                      |                      |
|                                                                          | <i>Riemerella anatipestifer</i> RA-GD                          | 1400                                    | 386321727        |                      |                      |
|                                                                          | <i>Zunongwangia profunda</i> SM-A87                            | 1388                                    | 295136244        |                      |                      |
|                                                                          | 8                                                              | <i>Actinomyces coleocanis</i> DSM 15436 | 1105             | 227494853            |                      |
| <i>Actinomyces georgiae</i> F0490                                        |                                                                | 1113                                    | 420151340        |                      |                      |
| <i>Actinomyces naeslundii</i> str. Howell 279                            |                                                                | 1101                                    | 400293272        |                      |                      |
| <i>Actinomyces</i> sp. ICM47                                             |                                                                | 1144                                    | 396585058        |                      |                      |
| <i>Actinomyces</i> sp. oral taxon 175 str. F0384                         |                                                                | 1095                                    | 343523232        |                      |                      |
| <i>Actinomyces</i> sp. oral taxon 181 str. F0379                         |                                                                | 1103                                    | 429758968        |                      |                      |
| <i>Actinomyces</i> sp. oral taxon 848 str. F0332                         |                                                                | 1120                                    | 269219760        |                      |                      |
| <i>Actinomyces turicensis</i> ACS-279-V-Col4                             |                                                                | 1114                                    | 405979650        |                      |                      |
| <i>Bifidobacterium dentium</i> Bd1                                       |                                                                | 1138                                    | 283456135        |                      |                      |
| <b><i>Bifidobacterium longum</i> DJO10A</b>                              |                                                                | <b>1187</b>                             | <b>189440764</b> | 189440765            |                      |
| <i>Bifidobacterium longum</i> subsp. <i>longum</i> 2-2B                  |                                                                | 1124                                    | 419852381        |                      |                      |
| <i>Bifidobacterium longum</i> subsp. <i>longum</i> KACC 91563            |                                                                | 1138                                    | 384200944        |                      |                      |
| <i>Bifidobacterium</i> sp. 12_1_47BFAA                                   |                                                                | 1151                                    | 317482066        | <b>317482065</b>     |                      |
| <i>Corynebacterium accolens</i> ATCC 49725                               |                                                                | 1099                                    | 227502575        |                      |                      |
| <i>Corynebacterium accolens</i> ATCC 49726                               |                                                                | 1099                                    | 306835141        |                      |                      |
| <i>Corynebacterium diphtheriae</i> 241                                   |                                                                | 1084                                    | 375289763        |                      |                      |
| <i>Corynebacterium diphtheriae</i> 31A                                   |                                                                | 1084                                    | 376283539        |                      | Type II-C            |
| <i>Corynebacterium diphtheriae</i> BH8                                   |                                                                | 1084                                    | 376286566        |                      |                      |
| <i>Corynebacterium diphtheriae</i> bv. <i>intermedius</i> str. NCTC 5011 |                                                                | 1084                                    | 419861895        |                      |                      |
| <i>Corynebacterium diphtheriae</i> C7 (beta)                             |                                                                | 1084                                    | 376289243        |                      |                      |
| <i>Corynebacterium diphtheriae</i> HC02                                  |                                                                | 1084                                    | 376292154        |                      |                      |
| <i>Corynebacterium diphtheriae</i> NCTC 13129                            |                                                                | 1084                                    | 38232678         |                      |                      |
| <i>Corynebacterium diphtheriae</i> VA01                                  |                                                                | 1084                                    | 376256051        |                      |                      |
| <i>Corynebacterium matruchotii</i> ATCC 14266                            |                                                                | 1089                                    | 305681510        |                      |                      |
| <i>Corynebacterium matruchotii</i> ATCC 33806                            |                                                                | 1069                                    | 225021644        |                      |                      |
| <i>Gardnerella vaginalis</i> 1500E                                       |                                                                | 1186                                    | 415717744        |                      |                      |
| <i>Gardnerella vaginalis</i> 284V                                        |                                                                | 1186                                    | 415703177        |                      |                      |
| <i>Gardnerella vaginalis</i> 5-1                                         | 1186                                                           | 298252606                               |                  |                      |                      |
| <i>Mobiluncus curtisii</i> subsp. <i>holmesii</i> ATCC 35242             | 1123                                                           | 315656340                               |                  |                      |                      |
| <i>Mobiluncus mulieris</i> 28-1                                          | 1091                                                           | 269977848                               |                  |                      |                      |
| <i>Mobiluncus mulieris</i> FB024-16                                      | 1091                                                           | 307700167                               |                  |                      |                      |
| <i>Scardovia inopinata</i> F0304                                         | 1178                                                           | 294790575                               |                  |                      |                      |
| 9                                                                        | <i>Bacillus cereus</i> BAG4X12-1                               | 1068                                    | 423439645        |                      |                      |
|                                                                          | <i>Bacillus cereus</i> BAG4X2-1                                | 1078                                    | 423445130        |                      |                      |
|                                                                          | <i>Bacillus cereus</i> Rock1-15                                | 1069                                    | 229113166        |                      |                      |
|                                                                          | <b><i>Bacillus smithii</i> 7_3_47FAA</b>                       | <b>1088</b>                             | <b>365156657</b> | 365156658            |                      |
|                                                                          | <i>Bacillus thuringiensis</i> serovar <i>finitimus</i> YBT-020 | 1069                                    | 384183447        |                      | Type II-C            |
|                                                                          | <i>Brevibacillus laterosporus</i> GI-9                         | 1092                                    | 421874297        | <b>421874296</b>     |                      |
|                                                                          | <i>Clostridium perfringens</i> C str. JGS1495                  | 1065                                    | 169343975        |                      |                      |
| <i>Clostridium perfringens</i> D str. JGS1721                            | 1065                                                           | 182624245                               |                  |                      |                      |
| <i>Sporolactobacillus vineae</i> DSM 21990 = SL153                       | 1084                                                           | 404330915                               |                  |                      |                      |
| 10                                                                       | <i>Gemella haemolysans</i> ATCC 10379                          | 1392                                    | 241889924        |                      |                      |
|                                                                          | <i>Gemella morbillorum</i> M424                                | 1385                                    | 317495358        |                      | Type II-A            |
|                                                                          | <i>Megasphaera</i> sp. UPII 135-E                              | 1352                                    | 342218215        |                      |                      |

| Cluster <sup>a</sup> | Strain <sup>b</sup>                                            | Cas9 length (aa) | Cas9 GI          | Cas1 GI <sup>c</sup> | Subtype <sup>d</sup> |
|----------------------|----------------------------------------------------------------|------------------|------------------|----------------------|----------------------|
| 10<br>(continued)    | <b><i>Veillonella atypica</i> ACS-134-V-Col7a</b>              | <b>1398</b>      | <b>303229466</b> | <b>303229394</b>     | Type II-A            |
|                      | <i>Veillonella parvula</i> ATCC 17745                          | 1398             | 282849530        |                      |                      |
|                      | <i>Veillonella</i> sp. 6_1_27                                  | 1395             | 294792465        |                      |                      |
|                      | <i>Veillonella</i> sp. oral taxon 780 str. F0422               | 1120             | 342213964        |                      |                      |
| 11                   | <i>Treponema denticola</i> AL-2                                | 1395             | 449103686        | <b>42525844</b>      | Type II-A            |
|                      | <i>Treponema denticola</i> ASLM                                | 1395             | 449106292        |                      |                      |
|                      | <b><i>Treponema denticola</i> ATCC 35405</b>                   | <b>1395</b>      | <b>42525843</b>  |                      |                      |
|                      | <i>Treponema denticola</i> H1-T                                | 1395             | 449118593        |                      |                      |
|                      | <i>Treponema denticola</i> H-22                                | 1395             | 449117322        |                      |                      |
|                      | <i>Treponema denticola</i> OTK                                 | 1395             | 449125136        |                      |                      |
|                      | <i>Treponema denticola</i> SP37                                | 1395             | 449130155        |                      |                      |
| 12                   | <b><i>Mycoplasma canis</i> PG 14</b>                           | <b>1233</b>      | <b>384393286</b> | <b>384393287</b>     | Type II-A            |
|                      | <i>Mycoplasma canis</i> PG 14                                  | 1233             | 419703974        |                      |                      |
|                      | <i>Mycoplasma canis</i> UF31                                   | 1233             | 384937953        |                      |                      |
|                      | <i>Mycoplasma canis</i> UF33                                   | 1233             | 419704625        |                      |                      |
|                      | <i>Mycoplasma canis</i> UFG1                                   | 1233             | 419705269        |                      |                      |
|                      | <i>Mycoplasma canis</i> UFG4                                   | 1233             | 419705920        |                      |                      |
|                      | <i>Mycoplasma cynos</i> C142                                   | 1239             | 433625054        |                      |                      |
| 13                   | <i>Enterococcus faecalis</i> Fly1                              | 1150             | 257084992        | <b>315149831</b>     | Type II-A            |
|                      | <i>Enterococcus faecalis</i> R508                              | 1150             | 424761124        |                      |                      |
|                      | <i>Enterococcus faecalis</i> T11                               | 1150             | 257419486        |                      |                      |
|                      | <b><i>Enterococcus faecalis</i> TX0012</b>                     | <b>1150</b>      | <b>315149830</b> |                      |                      |
|                      | <i>Enterococcus faecalis</i> TX0012                            | 1150             | 422729710        |                      |                      |
|                      | <i>Enterococcus faecalis</i> TX1342                            | 1150             | 422701955        |                      |                      |
|                      | <i>Facklamia hominis</i> CCUG 36813                            | 1142             | 406671118        |                      |                      |
| 14                   | <i>Gluconacetobacter diazotrophicus</i> PAI 5                  | 1003             | 209542524        | <b>296446028</b>     | Type II-C            |
|                      | <i>Gluconacetobacter diazotrophicus</i> PAI 5                  | 1050             | 162147907        |                      |                      |
|                      | <i>Methylocystis</i> sp. ATCC 49242                            | 1080             | 323139312        |                      |                      |
|                      | <b><i>Methylosinus trichosporium</i> OB3b</b>                  | <b>1082</b>      | <b>296446027</b> |                      |                      |
|                      | <i>Rhodopseudomonas palustris</i> BisB18                       | 1066             | 90425961         |                      |                      |
|                      | <i>Rhodopseudomonas palustris</i> BisB5                        | 1064             | 91975509         |                      |                      |
|                      | <i>Tistrella mobilis</i> KA081020-065                          | 1049             | 389874754        |                      |                      |
| 15                   | <i>Francisella</i> cf. <i>novicida</i> 3523                    | 1646             | 387824704        | <b>118497352</b>     | Type II-B            |
|                      | <i>Francisella</i> cf. <i>novicida</i> Fx1                     | 1629             | 385792694        |                      |                      |
|                      | <i>Francisella novicida</i> FTG                                | 1629             | 208779141        |                      |                      |
|                      | <i>Francisella novicida</i> GA99-3548                          | 1629             | 254374175        |                      |                      |
|                      | <b><i>Francisella novicida</i> U112</b>                        | <b>1629</b>      | <b>118497352</b> |                      |                      |
|                      | <i>Francisella tularensis</i> subsp. <i>novicida</i> GA99-3549 | 1629             | 254372717        |                      |                      |
| 16                   | <i>Acidovorax avenae</i> subsp. <i>avenae</i> ATCC 19860       | 1045             | 326315085        | <b>330822846</b>     | Type II-C            |
|                      | <i>Alicyclophilus denitrificans</i> BC                         | 1029             | 319760940        |                      |                      |
|                      | <b><i>Alicyclophilus denitrificans</i> K601</b>                | <b>1029</b>      | <b>330822845</b> |                      |                      |
|                      | gamma proteobacterium HdN1                                     | 1025             | 304313029        |                      |                      |
|                      | <i>Nitrosomonas</i> sp. AL212                                  | 1044             | 325983496        |                      |                      |
|                      | <i>Verminephrobacter eiseniae</i> EF01-2                       | 1068             | 121608211        |                      |                      |
| 17                   | <i>Mycoplasma gallisepticum</i> NC95_13295-2-2P                | 1269             | 401767318        | <b>284931711</b>     | Type II-A            |
|                      | <i>Mycoplasma gallisepticum</i> NY01_2001.047-5-1P             | 1224             | 401768851        |                      |                      |
|                      | <b><i>Mycoplasma gallisepticum</i> str. F</b>                  | <b>1269</b>      | <b>284931710</b> |                      |                      |
|                      | <i>Mycoplasma gallisepticum</i> str. F                         | 1269             | 385326554        |                      |                      |
|                      | <i>Mycoplasma gallisepticum</i> str. R(low)                    | 1270             | 294660600        |                      |                      |
| 18                   | <i>Prevotella buccalis</i> ATCC 35310                          | 1218             | 282878504        | <b>282880052</b>     | Type II-C            |
|                      | <i>Prevotella ruminicola</i> 23                                | 1204             | 294674019        |                      |                      |
|                      | <i>Prevotella stercorea</i> DSM 18206                          | 1216             | 359406728        |                      |                      |
|                      | <i>Prevotella tanneriae</i> ATCC 51259                         | 1234             | 258648111        |                      |                      |
|                      | <b><i>Prevotella timonensis</i> CRIS 5C-B1</b>                 | <b>1218</b>      | <b>282880052</b> |                      |                      |
|                      | <i>Phascolarctobacterium succinatutens</i> YIT 12067           | 1087             | 323142435        |                      |                      |
| 19                   | <i>Roseburia intestinalis</i> L1-82                            | 1140             | 257413184        | <b>225377803</b>     | Type II-C            |
|                      | <i>Roseburia intestinalis</i> M50/1                            | 1128             | 291537230        |                      |                      |
|                      | <b><i>Roseburia inulinivorans</i> DSM 16841</b>                | <b>1152</b>      | <b>225377804</b> |                      |                      |
|                      | <i>Subdoligranulum</i> sp. 4_3_54A2FAA                         | 1084             | 365132400        |                      |                      |
| 20                   | <b><i>Coriobacterium glomerans</i> PW2</b>                     | <b>1384</b>      | <b>328956315</b> | <b>328956316</b>     | Type II-A            |
|                      | <i>Eggerthella</i> sp. YY7918                                  | 1380             | 339445983        |                      |                      |

| Cluster <sup>a</sup> | Strain <sup>b</sup>                                                      | Cas9 length (aa) | Cas9 GI          | Cas1 GI <sup>c</sup> | Subtype <sup>d</sup> |
|----------------------|--------------------------------------------------------------------------|------------------|------------------|----------------------|----------------------|
| 20<br>(continued)    | <i>Gordonibacter pamelaee</i> 7-10-1-b                                   | 1371             | 295106015        |                      | Type II-A            |
|                      | <i>Olsenella uli</i> DSM 7084                                            | 1399             | 302336020        |                      |                      |
| 21                   | <b><i>Fusobacterium nucleatum</i> subsp. <i>vincentii</i> ATCC 49256</b> | <b>1374</b>      | <b>34762592</b>  | 34762593             | Type II-A            |
|                      | <i>Fusobacterium</i> sp. 1_1_41FAA                                       | 1367             | 294782278        |                      |                      |
|                      | <i>Fusobacterium</i> sp. 3_1_27                                          | 1367             | 294785695        |                      |                      |
|                      | <i>Fusobacterium</i> sp. 3_1_36A2                                        | 1367             | 256845019        | <b>256845020</b>     |                      |
| 22                   | <i>Finegoldia magna</i> ACS-171-V-Col3                                   | 1347             | 302380288        |                      | Type II-A            |
|                      | <b><i>Finegoldia magna</i> ATCC 29328</b>                                | <b>1348</b>      | <b>169823755</b> | <b>169823756</b>     |                      |
|                      | <i>Finegoldia magna</i> SY403409CC001050417                              | 1348             | 417926052        |                      |                      |
|                      | <i>Helcococcus kunzii</i> ATCC 51366                                     | 1338             | 375092427        |                      |                      |
| 23                   | <i>Prevotella denticola</i> CRIS 18C-A                                   | 1422             | 325859619        |                      | Type II-C            |
|                      | <i>Prevotella micans</i> F0438                                           | 1425             | 373501184        |                      |                      |
|                      | <b><i>Prevotella</i> sp. C561</b>                                        | <b>1424</b>      | <b>345885718</b> | <b>345885719</b>     |                      |
| 24                   | <i>Leuconostoc gelidum</i> KCTC 3527                                     | 1355             | 333398273        |                      | Type II-A            |
|                      | <b><i>Oenococcus kitaharae</i> DSM 17330</b>                             | <b>1389</b>      | <b>366983953</b> | <b>366983954</b>     |                      |
|                      | <i>Oenococcus kitaharae</i> DSM 17330                                    | 1389             | 372325145        |                      |                      |
| 25                   | <i>Anaerococcus tetradius</i> ATCC 35098                                 | 1361             | 227501312        |                      | Type II-A            |
|                      | <i>Lactobacillus iners</i> LactinV 11V1-d                                | 1369             | 309803917        |                      |                      |
|                      | <b><i>Peptoniphilus duerdenii</i> ATCC BAA-1640</b>                      | <b>1364</b>      | <b>304438954</b> | <b>304438953</b>     |                      |
|                      | <b><i>Coprococcus catus</i> GD/7</b>                                     | <b>1338</b>      | <b>291520705</b> | <b>291520706</b>     |                      |
| 26                   | <i>Dorea longicatena</i> DSM 13814                                       | 1340             | 153855454        |                      | Type II-A            |
|                      | <i>Ruminococcus lactaris</i> ATCC 29176                                  | 1341             | 197301447        |                      |                      |
|                      | <b><i>Staphylococcus pseudintermedius</i> ED99</b>                       | <b>1334</b>      | <b>323463801</b> | <b>323463802</b>     |                      |
| 27                   | <i>Staphylococcus pseudintermedius</i> ED99                              | 1334             | 386318630        |                      | Type II-A            |
|                      | <i>Staphylococcus simulans</i> ACS-120-V-Sch1                            | 1112             | 414160476        |                      |                      |
|                      | <b><i>Dinoroseobacter shibae</i> DFL 12</b>                              | <b>1079</b>      | <b>159042956</b> | <b>159042957</b>     |                      |
| 28                   | <i>Sphingobium</i> sp. AP49                                              | 1110             | 398385143        |                      | Type II-C            |
|                      | <i>Sphingomonas</i> sp. S17                                              | 1090             | 332188827        |                      |                      |
|                      | <b><i>Flavobacterium branchiophilum</i> FL-15</b>                        | <b>1473</b>      | <b>347536497</b> | no <i>cas1</i>       |                      |
| 29                   | <i>Flavobacterium columnare</i> ATCC 49512                               | 1535             | 365959402        |                      | Type II-C            |
|                      | <b><i>Bifidobacterium bifidum</i> S17</b>                                | <b>1420</b>      | <b>310286728</b> | <b>310286727</b>     |                      |
| 30                   | <i>Scardovia wiggisiae</i> F0424                                         | 1471             | 423349694        |                      | Type II-A            |
|                      | <i>Burkholderiales</i> bacterium 1_1_47                                  | 1428             | 303257695        |                      |                      |
| 31                   | <b><i>Parasutterella excrementihominis</i> YIT 11859</b>                 | <b>1428</b>      | <b>331001027</b> | <b>331001028</b>     | Type II-B            |
| 32                   | <b><i>Streptococcus sanguinis</i> SK49</b>                               | <b>1421</b>      | <b>422884106</b> | <b>422884107</b>     | Type II-A            |
|                      | <i>Streptococcus</i> sp. oral taxon 71 str. 73H25AP                      | 1420             | 306826314        |                      |                      |
| 33                   | <i>Eubacterium</i> sp. AS15                                              | 1391             | 402309258        |                      | Type II-A            |
|                      | <b><i>Eubacterium yurii</i> subsp. <i>margaretiae</i> ATCC 43715</b>     | <b>1391</b>      | <b>306821691</b> | <b>306821690</b>     |                      |
| 34                   | <i>Legionella pneumophila</i> 130b                                       | 1372             | 307608922        |                      | Type II-B            |
|                      | <b><i>Legionella pneumophila</i> str. Paris</b>                          | <b>1372</b>      | <b>54296138</b>  | <b>54296139</b>      |                      |
| 35                   | <i>Acidaminococcus intestini</i> RyC-MR95                                | 1358             | 352684361        |                      | Type II-A            |
|                      | <b><i>Acidaminococcus</i> sp. D21</b>                                    | <b>1358</b>      | <b>227824983</b> | <b>227824982</b>     |                      |
| 36                   | <b><i>Lactobacillus farciminis</i> KCTC 3681</b>                         | <b>1356</b>      | <b>336394882</b> | <b>336394883</b>     | Type II-A            |
|                      | <i>Lactobacillus versmoldensis</i> KCTC 3814                             | 1289             | 365906066        |                      |                      |
| 37                   | <i>Mycoplasma synoviae</i> 53                                            | 1304             | 144575181        |                      | Type II-A            |
|                      | <b><i>Mycoplasma synoviae</i> 53</b>                                     | <b>1314</b>      | <b>71894592</b>  | <b>71894593</b>      |                      |
| 38                   | <b><i>Elusimicrobium minutum</i> Pei191</b>                              | <b>1195</b>      | <b>187250660</b> | <b>187250661</b>     | Type II-C            |
|                      | uncultured Termite group 1 bacterium phylotype Rs-D17                    | 1032             | 189485059        |                      |                      |
| 39                   | <i>Clostridium spiroforme</i> DSM 1552                                   | 1116             | 169349750        |                      | Type II-A            |
|                      | <b><i>Eubacterium dolichum</i> DSM 3991</b>                              | <b>1096</b>      | <b>160915782</b> | <b>160915783</b>     |                      |
| 40                   | <b><i>Eubacterium rectale</i> ATCC 33656</b>                             | <b>1114</b>      | <b>238924075</b> | <b>238924076</b>     | Type II-A            |
|                      | <i>Eubacterium ventriosum</i> ATCC 27560                                 | 1107             | 154482474        |                      |                      |
| 41                   | <i>Staphylococcus aureus</i> subsp. <i>aureus</i>                        | 1053             | 403411236        |                      | Type II-A            |
|                      | <b><i>Staphylococcus lugdunensis</i> M23590</b>                          | <b>1054</b>      | <b>315659848</b> | <b>315659847</b>     |                      |
| 42                   | <b><i>Ignavibacterium album</i> JCM 16511</b>                            | <b>1688</b>      | <b>385811609</b> | <b>385811610</b>     | Type II-C            |
| 43                   | <b><i>Odoribacter laneus</i> YIT 12061</b>                               | <b>1498</b>      | <b>374384763</b> | <b>374384762</b>     | Type II-C            |
| 44                   | <b><i>Caenispirillum salinarum</i> AK4</b>                               | <b>1442</b>      | <b>427429481</b> | <b>427429479</b>     | Type II-C            |
| 45                   | <b><i>Sutterella wadsworthensis</i> 3_1_45B</b>                          | <b>1422</b>      | <b>319941583</b> | <b>319941582</b>     | Type II-B            |
| 46                   | <b><i>Bergeyella zoohelcum</i> ATCC 43767</b>                            | <b>1415</b>      | <b>423317190</b> | <b>423317188</b>     | Type II-C            |
| 47                   | <b><i>Wolinella succinogenes</i> DSM 1740</b>                            | <b>1409</b>      | <b>34557932</b>  | <b>34557933</b>      | Type II-B            |

| Cluster <sup>a</sup> | Strain <sup>b</sup>                                                | Cas9 length (aa) | Cas9 GI          | Cas1 GI <sup>c</sup> | Subtype <sup>d</sup> |
|----------------------|--------------------------------------------------------------------|------------------|------------------|----------------------|----------------------|
| 48                   | <i>gamma proteobacterium</i> HTCC5015                              | 1397             | 254447899        | no <i>cas1</i>       | Type II-B            |
| 49                   | <i>Filifactor alocis</i> ATCC 35896                                | 1365             | 374307738        | 374307737            | Type II-A            |
| 50                   | <i>Planococcus antarcticus</i> DSM 14505                           | 1333             | 389815359        | 389815358            | Type II-A            |
| 51                   | <i>Catenibacterium mitsuokai</i> DSM 15897                         | 1329             | 224543312        | 224543313            | Type II-A            |
| 52                   | <i>Solobacterium moorei</i> F0204                                  | 1327             | 320528778        | 320528779            | Type II-A            |
| 53                   | <i>Fructobacillus fructosus</i> KCTC 3544                          | 1323             | 339625081        | 339625080            | Type II-A            |
| 54                   | <i>Mycoplasma ovipneumoniae</i> SC01                               | 1265             | 363542550        | 363542551            | Type II-A            |
| 54                   | <i>Streptobacillus moniliformis</i> DSM 12112                      | 1259             | 269123826        |                      |                      |
| 55                   | <i>Mycoplasma mobile</i> 163K                                      | 1236             | 47458868         | 47458867             | Type II-A            |
| 56                   | <i>Porphyromonas</i> sp. oral taxon 279 str. F0450                 | 1197             | 402847315        | 402847305            | Type II-C            |
| 57                   | <i>Actinomyces</i> sp. oral taxon 180 str. F0310                   | 1181             | 315605738        | 315605739            | Type II-C            |
| 58                   | <i>Sphaerochaeta globus</i> str. Buddy                             | 1179             | 325972003        | 325972002            | Type II-C            |
| 59                   | <i>Rhodospirillum rubrum</i> ATCC 11170                            | 1173             | 83591793         | 83591790             | Type II-C            |
| 60                   | <i>Azospirillum</i> sp. B510                                       | 1168             | 288957741        | 288957738            | Type II-C            |
| 61                   | <i>Nitrobacter hamburgensis</i> X14                                | 1166             | 92109262         | no <i>cas1</i>       | Type II-C            |
| 62                   | <i>Ruminococcus albus</i> 8                                        | 1156             | 325677756        | 325677757            | Type II-C            |
| 63                   | <i>Barnesiella intestinihominis</i> YIT 11860                      | 1153             | 404487228        | 404487227            | Type II-C            |
| 64                   | <i>Alicyclobacillus hesperidum</i> URH17-3-68                      | 1146             | 403744858        | 403744859            | Type II-C            |
| 65                   | <i>Acidothermus cellulolyticus</i> 11B                             | 1138             | 117929158        | 117929157            | Type II-C            |
| 66                   | <i>Nitratifactor salsuginis</i> DSM 16511                          | 1132             | 319957206        | 319957207            | Type II-C            |
| 67                   | <i>Acidovorax ebreus</i> TSPY                                      | 1131             | 222109285        | 222109284            | Type II-C            |
| 67                   | <i>Francisella tularensis</i> subsp. <i>tularensis</i> WY96-3418   | 1125             | 134302318        |                      |                      |
| 68                   | <i>Lactobacillus coryniformis</i> subsp. <i>torquens</i> KCTC 3535 | 1119             | 336393381        | 336393380            | Type II-C            |
| 69                   | <i>Alcanivorax</i> sp. W11-5                                       | 1113             | 407803669        | 407803668            | Type II-C            |
| 70                   | <i>Akkermansia muciniphila</i> ATCC BAA-835                        | 1101             | 187736489        | 187736488            | Type II-C            |
| 71                   | <i>Ilyobacter polytropus</i> DSM 2926                              | 1092             | 310780384        | 310780383            | Type II-C            |
| 72                   | <i>Bradyrhizobium</i> sp. BTAi1                                    | 1064             | 148255343        | no <i>cas1</i>       | Type II-C            |
| 73                   | <i>Ralstonia syzygii</i> R24                                       | 1062             | 344171927        | 344171926            | Type II-C            |
| 74                   | <i>Treponema</i> sp. JC4                                           | 1062             | 384109266        | 384109265            | Type II-C            |
| 75                   | <i>Wolinella succinogenes</i> DSM 1740                             | 1059             | 34557790         | 34557789             | Type II-C            |
| 76                   | <i>Rhodovulum</i> sp. PH10                                         | 1059             | 402849997        | 402849996            | Type II-C            |
| 77                   | <i>Aminomonas paucivorans</i> DSM 12260                            | 1052             | 312879015        | 312879014            | Type II-C            |
| 77                   | <i>Bacteroides</i> sp. 3_1_33FAA                                   | 1055             | 265750948        |                      |                      |
| 78                   | <i>Parvibaculum lavamentivorans</i> DS-1                           | 1037             | 154250555        | 154250554            | Type II-C            |
| 79                   | <i>Candidatus Puniceispirillum marinum</i> IMCC1322                | 1035             | 294086111        | 294086112            | Type II-C            |
| 80                   | <i>Blastopirellula marina</i> DSM 3645                             | 1027             | 87307579         |                      |                      |
| 80                   | <i>Helicobacter mustelae</i> 12198                                 | 1024             | 291276265        | 291276264            | Type II-C            |
| 81                   | <i>Clostridium cellulolyticum</i> H10                              | 1021             | 220930482        | 220930481            | Type II-C            |
| 82                   | <i>Lactobacillus crispatus</i> FB077-07                            | 857              | 423321767        |                      |                      |
| 82                   | <b>uncultured delta proteobacterium HF0070_07E19</b>               | <b>1011</b>      | <b>297182908</b> | no <i>cas1</i>       | <b>Type II-C</b>     |
|                      | <i>Acetobacter acetii</i> NBRC 14818                               | 240              | 340779894        |                      |                      |
|                      | <i>Acetobacter acetii</i> NBRC 14818                               | 376              | 340779669        |                      |                      |
|                      | <i>Acetobacter acetii</i> NBRC 14818                               | 400              | 340779439        |                      |                      |
|                      | <i>Actinobacillus ureae</i> ATCC 25976                             | 239              | 322514756        |                      |                      |
|                      | <i>Actinobacillus ureae</i> ATCC 25976                             | 400              | 322514772        |                      |                      |
|                      | <i>Bacillus cereus</i> BAG2X1-3                                    | 333              | 423408783        |                      |                      |
|                      | <i>Bacteroides cellulosilyticus</i> DSM 14838                      | 206              | 224535831        |                      |                      |
|                      | <i>Bacteroides cellulosilyticus</i> DSM 14838                      | 1219             | 224535832        |                      |                      |
|                      | <i>Bacteroides coprosuis</i> DSM 18011                             | 349              | 333031028        |                      |                      |
|                      | <i>Bacteroides oleiciplenus</i> YIT 12058                          | 653              | 427387687        |                      |                      |
|                      | <i>Bacteroides oleiciplenus</i> YIT 12058                          | 779              | 427387686        |                      |                      |
|                      | <i>Bacteroides</i> sp. 9_1_42FAA                                   | 1055             | 237710146        |                      |                      |
|                      | <i>Bacteroides uniformis</i> CL03T12C37                            | 286              | 423308124        |                      |                      |
|                      | <i>Bacteroides uniformis</i> CL03T12C37                            | 1210             | 423308121        |                      |                      |
|                      | <i>Bifidobacterium bifidum</i> IPLA 20015                          | 1281             | 421736922        |                      |                      |
|                      | <i>Bifidobacterium dentium</i> ATCC 27678                          | 1121             | 171742822        |                      |                      |
|                      | <i>Bifidobacterium longum</i> subsp. <i>longum</i> 1-6B            | 182              | 419848319        |                      |                      |
|                      | <i>Bifidobacterium longum</i> subsp. <i>longum</i> 1-6B            | 354              | 419847807        |                      |                      |
|                      | <i>Bifidobacterium longum</i> subsp. <i>longum</i> 1-6B            | 441              | 419848320        |                      |                      |
|                      | <i>Bifidobacterium longum</i> subsp. <i>longum</i> 44B             | 166              | 419856168        |                      |                      |



| Cluster <sup>a</sup> | Strain <sup>b</sup>                                            | Cas9<br>length (aa) | Cas9 GI   | Cas1 GI <sup>c</sup> | Subtype <sup>d</sup> |
|----------------------|----------------------------------------------------------------|---------------------|-----------|----------------------|----------------------|
|                      | <i>Bifidobacterium longum</i> subsp. <i>longum</i> 44B         | 967                 | 419856216 |                      |                      |
|                      | <i>Butyrivibrio fibrisolvens</i> 16/4                          | 103                 | 291518094 |                      |                      |
|                      | <i>Butyrivibrio fibrisolvens</i> 16/4                          | 177                 | 291518096 |                      |                      |
|                      | <i>Butyrivibrio fibrisolvens</i> 16/4                          | 765                 | 291518097 |                      |                      |
|                      | <i>Campylobacter coli</i> 2685                                 | 933                 | 419548338 |                      |                      |
|                      | <i>Campylobacter jejuni</i> subsp. <i>jejuni</i> 2008-894      | 666                 | 419652996 |                      |                      |
|                      | <i>Campylobacter jejuni</i> subsp. <i>jejuni</i> 305           | 190                 | 317510779 |                      |                      |
|                      | <i>Campylobacter jejuni</i> subsp. <i>jejuni</i> 305           | 759                 | 317510780 |                      |                      |
|                      | <i>Campylobacter jejuni</i> subsp. <i>jejuni</i> 327           | 462                 | 415747744 |                      |                      |
|                      | <i>Campylobacter jejuni</i> subsp. <i>jejuni</i> 327           | 512                 | 415747743 |                      |                      |
|                      | <i>Campylobacter jejuni</i> subsp. <i>jejuni</i> CG8421        | 721                 | 205356639 |                      |                      |
|                      | <i>Campylobacter jejuni</i> subsp. <i>jejuni</i> M1            | 861                 | 384442103 |                      |                      |
|                      | candidate division TM7 single-cell isolate TM7c                | 372                 | 167957190 |                      |                      |
|                      | <i>Capnocytophaga ochracea</i> F0287                           | 303                 | 315224863 |                      |                      |
|                      | <i>Capnocytophaga ochracea</i> F0287                           | 1117                | 315224862 |                      |                      |
|                      | <i>Coprococcus comes</i> ATCC 27758                            | 686                 | 226325213 |                      |                      |
|                      | <i>Diplosphaera colitermitum</i> TAV2                          | 210                 | 225164109 |                      |                      |
|                      | <i>Enterococcus faecalis</i> TX1467                            | 921                 | 422867931 |                      |                      |
|                      | <i>Enterococcus faecalis</i> TX4248                            | 936                 | 307270261 |                      |                      |
|                      | <i>Enterococcus faecium</i> E2620                              | 892                 | 431752788 |                      |                      |
|                      | <i>Enterococcus</i> sp. 7L76                                   | 116                 | 295113136 |                      |                      |
|                      | <i>Francisella tularensis</i> subsp. <i>holarctica</i> 257     | 878                 | 254367943 |                      |                      |
|                      | <i>Francisella tularensis</i> subsp. <i>holarctica</i> FSC022  | 158                 | 254369498 |                      |                      |
|                      | <i>Francisella tularensis</i> subsp. <i>holarctica</i> FSC022  | 244                 | 254369502 |                      |                      |
|                      | <i>Francisella tularensis</i> subsp. <i>holarctica</i> FSC022  | 292                 | 254369497 |                      |                      |
|                      | <i>Francisella tularensis</i> subsp. <i>holarctica</i> FSC022  | 393                 | 254369499 |                      |                      |
|                      | <i>Francisella tularensis</i> subsp. <i>holarctica</i> FSC022  | 501                 | 254369496 |                      |                      |
|                      | <i>Francisella tularensis</i> subsp. <i>holarctica</i> LVS     | 158                 | 89256630  |                      |                      |
|                      | <i>Francisella tularensis</i> subsp. <i>holarctica</i> LVS     | 393                 | 89256631  |                      |                      |
|                      | <i>Francisella tularensis</i> subsp. <i>holarctica</i> URFT1   | 53                  | 290953529 |                      |                      |
|                      | <i>Francisella tularensis</i> subsp. <i>holarctica</i> URFT1   | 285                 | 290953528 |                      |                      |
|                      | <i>Francisella tularensis</i> subsp. <i>tularensis</i> SCHU S4 | 1123                | 56707712  |                      |                      |
|                      | <i>Gemella haemolysans</i> M341                                | 1258                | 329766883 |                      |                      |
|                      | <i>Haemophilus pittmaniae</i> HK 85                            | 121                 | 343519651 |                      |                      |
|                      | <i>Haemophilus pittmaniae</i> HK 85                            | 203                 | 343519677 |                      |                      |
|                      | <i>Haemophilus pittmaniae</i> HK 85                            | 650                 | 343519679 |                      |                      |
|                      | <i>Helicobacter hepaticus</i> ATCC 51449                       | 131                 | 32266975  |                      |                      |
|                      | <i>Helicobacter pullorum</i> MIT 98-5489                       | 344                 | 242308998 |                      |                      |
|                      | <i>Helicobacter pullorum</i> MIT 98-5489                       | 702                 | 242309214 |                      |                      |
|                      | <i>Kingella kingae</i> ATCC 23330                              | 1000                | 333374624 |                      |                      |
|                      | <i>Lactobacillus buchneri</i> ATCC 11577                       | 1239                | 227512703 |                      |                      |
|                      | <i>Lactobacillus casei</i> 21/1                                | 234                 | 417984225 |                      |                      |
|                      | <i>Lactobacillus casei</i> 21/1                                | 1128                | 417984226 |                      |                      |
|                      | <i>Lactobacillus casei</i> CRF28                               | 566                 | 417994652 |                      |                      |
|                      | <i>Lactobacillus casei</i> CRF28                               | 700                 | 417993346 |                      |                      |
|                      | <i>Lactobacillus casei</i> UW1                                 | 315                 | 418005912 |                      |                      |
|                      | <i>Lactobacillus casei</i> UW1                                 | 330                 | 418005913 |                      |                      |
|                      | <i>Lactobacillus casei</i> UW1                                 | 412                 | 418005908 |                      |                      |
|                      | <i>Lactobacillus casei</i> UW4                                 | 236                 | 418008739 |                      |                      |
|                      | <i>Lactobacillus casei</i> UW4                                 | 330                 | 418008740 |                      |                      |
|                      | <i>Lactobacillus crispatus</i> 214-1                           | 534                 | 293381764 |                      |                      |
|                      | <i>Lactobacillus crispatus</i> CTV-05                          | 298                 | 312978192 |                      |                      |
|                      | <i>Lactobacillus crispatus</i> FB049-03                        | 206                 | 423318602 |                      |                      |
|                      | <i>Lactobacillus crispatus</i> FB049-03                        | 347                 | 423318603 |                      |                      |
|                      | <i>Lactobacillus crispatus</i> FB049-03                        | 857                 | 423318600 |                      |                      |
|                      | <i>Lactobacillus crispatus</i> JV-V01                          | 278                 | 227878395 |                      |                      |
|                      | <i>Lactobacillus crispatus</i> JV-V01                          | 544                 | 227878705 |                      |                      |
|                      | <i>Lactobacillus crispatus</i> MV-1A-US                        | 277                 | 256850790 |                      |                      |
|                      | <i>Lactobacillus crispatus</i> MV-1A-US                        | 538                 | 256850346 |                      |                      |
|                      | <i>Lactobacillus crispatus</i> MV-3A-US                        | 279                 | 262048056 |                      |                      |
|                      | <i>Lactobacillus delbrueckii</i> subsp. <i>bulgaricus</i> 2038 | 544                 | 385815564 |                      |                      |
|                      | <i>Lactobacillus delbrueckii</i> subsp. <i>bulgaricus</i> 2038 | 669                 | 385815562 |                      |                      |

| Cluster <sup>a</sup> | Strain <sup>b</sup>                                                      | Cas9<br>length (aa) | Cas9 GI   | Cas1 GI <sup>c</sup> | Subtype <sup>d</sup> |
|----------------------|--------------------------------------------------------------------------|---------------------|-----------|----------------------|----------------------|
|                      | <i>Lactobacillus iners</i> LactinV 09V1-c                                | 255                 | 309804524 |                      |                      |
|                      | <i>Lactobacillus iners</i> LactinV 09V1-c                                | 343                 | 309804534 |                      |                      |
|                      | <i>Lactobacillus iners</i> LactinV 09V1-c                                | 447                 | 309804536 |                      |                      |
|                      | <i>Lactobacillus iners</i> SPIN 2503V10-D                                | 270                 | 309809475 |                      |                      |
|                      | <i>Lactobacillus iners</i> SPIN 2503V10-D                                | 667                 | 309809480 |                      |                      |
|                      | <i>Lactobacillus ruminis</i> ATCC 25644                                  | 1352                | 417973941 |                      |                      |
|                      | <i>Lactobacillus salivarius</i> ACS-116-V-Col5a                          | 629                 | 301299400 |                      |                      |
|                      | <i>Lactobacillus salivarius</i> CECT 5713                                | 897                 | 385839899 |                      |                      |
|                      | <i>Lactobacillus salivarius</i> UCC118                                   | 1149                | 90961083  |                      |                      |
|                      | <i>Leptospira inadai</i> serovar Lyme str. 10                            | 125                 | 398345609 |                      |                      |
|                      | <i>Leptospira inadai</i> serovar Lyme str. 10                            | 418                 | 398341884 |                      |                      |
|                      | <i>Leptospira inadai</i> serovar Lyme str. 10                            | 907                 | 398345610 |                      |                      |
|                      | <i>Leuconostoc pseudomesenteroides</i> 4882                              | 468                 | 399517481 |                      |                      |
|                      | <i>Leuconostoc pseudomesenteroides</i> 4882                              | 883                 | 399517482 |                      |                      |
|                      | <i>Listeria ivanovii</i> FSL F6-596                                      | 232                 | 315301622 |                      |                      |
|                      | <i>Listeria ivanovii</i> FSL F6-596                                      | 849                 | 315301624 |                      |                      |
|                      | <i>Listeria monocytogenes</i> FSL F2-208                                 | 782                 | 422410878 |                      |                      |
|                      | <i>Listeria monocytogenes</i> FSL J1-208                                 | 300                 | 255024093 |                      |                      |
|                      | <i>Listeria seeligeri</i> FSL N1-067                                     | 874                 | 313631816 |                      |                      |
|                      | <i>Listeria seeligeri</i> FSL N1-067                                     | 874                 | 422420175 |                      |                      |
|                      | <i>Maritimibacter alkaliphilus</i> HTCC2654                              | 997                 | 84685065  |                      |                      |
|                      | <i>Mycoplasma iowae</i> 695                                              | 226                 | 350547050 |                      |                      |
|                      | <i>Mycoplasma iowae</i> 695                                              | 933                 | 350546886 |                      |                      |
|                      | <i>Neisseria lactamica</i> ATCC 23970                                    | 408                 | 269215119 |                      |                      |
|                      | <i>Neisseria lactamica</i> ATCC 23970                                    | 666                 | 269215120 |                      |                      |
|                      | <i>Neisseria lactamica</i> Y92-1009                                      | 241                 | 422110930 |                      |                      |
|                      | <i>Neisseria lactamica</i> Y92-1009                                      | 828                 | 422110931 |                      |                      |
|                      | <i>Neisseria meningitidis</i> NM3001                                     | 67                  | 421568320 |                      |                      |
|                      | <i>Neisseria meningitidis</i> NM3001                                     | 976                 | 421568319 |                      |                      |
|                      | <i>Neisseria mucosa</i> C102                                             | 220                 | 319639577 |                      |                      |
|                      | <i>Neisseria</i> sp. oral taxon 20 str. F0370                            | 392                 | 429743981 |                      |                      |
|                      | <i>Neisseria</i> sp. oral taxon 20 str. F0370                            | 701                 | 429743980 |                      |                      |
|                      | <i>Neisseria subflava</i> NJ9703                                         | 587                 | 284799897 |                      |                      |
|                      | <i>Nitritalea halalkaliphila</i> LW7                                     | 79                  | 390445315 |                      |                      |
|                      | <i>Nitrobacter hamburgensis</i> X14                                      | 641                 | 92118334  |                      |                      |
|                      | <i>Oribacterium sinus</i> F0268                                          | 653                 | 227873236 |                      |                      |
|                      | <i>Parabacteroides merdae</i> ATCC 43184                                 | 103                 | 154493351 |                      |                      |
|                      | <i>Parabacteroides merdae</i> CL03T12C32                                 | 84                  | 423346601 |                      |                      |
|                      | <i>Parabacteroides merdae</i> CL09T00C40                                 | 82                  | 423723156 |                      |                      |
|                      | <i>Pasteurella bettyae</i> CCUG 2042                                     | 398                 | 387770127 |                      |                      |
|                      | <i>Pasteurella bettyae</i> CCUG 2042                                     | 610                 | 387770112 |                      |                      |
|                      | <i>Pasteurella multocida</i> subsp. <i>multocida</i> str. Anand1_buffalo | 199                 | 421253447 |                      |                      |
|                      | <i>Pasteurella multocida</i> subsp. <i>multocida</i> str. Anand1_cattle  | 53                  | 421259752 |                      |                      |
|                      | <i>Pasteurella multocida</i> subsp. <i>multocida</i> str. Anand1_cattle  | 63                  | 421259756 |                      |                      |
|                      | <i>Pasteurella multocida</i> subsp. <i>multocida</i> str. Anand1_cattle  | 134                 | 421259749 |                      |                      |
|                      | <i>Pediococcus acidilactici</i> 7_4                                      | 1229                | 270290729 |                      |                      |
|                      | <i>Pediococcus lolii</i> NGRI 0510Q                                      | 270                 | 427443367 |                      |                      |
|                      | <i>Pediococcus lolii</i> NGRI 0510Q                                      | 1016                | 427441502 |                      |                      |
|                      | <i>Peptoniphilus</i> sp. oral taxon 386 str. F0131                       | 1341                | 299144352 |                      |                      |
|                      | <i>Porphyromonas catoniae</i> F0037                                      | 211                 | 429741290 |                      |                      |
|                      | <i>Porphyromonas catoniae</i> F0037                                      | 1009                | 429741242 |                      |                      |
|                      | <i>Prevotella denticola</i> F0289                                        | 1218                | 327314511 |                      |                      |
|                      | <i>Prevotella disiens</i> FB035-09AN                                     | 443                 | 303235616 |                      |                      |
|                      | <i>Prevotella disiens</i> FB035-09AN                                     | 795                 | 303237415 |                      |                      |
|                      | <i>Prevotella melaninogenica</i> D18                                     | 1354                | 288802595 |                      |                      |
|                      | <i>Prevotella multiformis</i> DSM 16608                                  | 129                 | 325268382 |                      |                      |
|                      | <i>Prevotella multiformis</i> DSM 16608                                  | 535                 | 325268383 |                      |                      |
|                      | <i>Prevotella oulorum</i> F0390                                          | 691                 | 345881543 |                      |                      |
|                      | <i>Prevotella oulorum</i> F0390                                          | 774                 | 345881542 |                      |                      |
|                      | <i>Prevotella saccharolytica</i> F0055                                   | 242                 | 429739781 |                      |                      |
|                      | <i>Prevotella</i> sp. oral taxon 317 str. F0108                          | 593                 | 288929745 |                      |                      |
|                      | <i>Prevotella</i> sp. oral taxon 317 str. F0108                          | 1174                | 288930149 |                      |                      |

| Cluster <sup>a</sup> | Strain <sup>b</sup>                                                   | Cas9 length (aa) | Cas9 GI   | Cas1 GI <sup>c</sup> | Subtype <sup>d</sup> |
|----------------------|-----------------------------------------------------------------------|------------------|-----------|----------------------|----------------------|
|                      | <i>Prevotella</i> sp. oral taxon 472 str. F0295                       | 241              | 260910968 |                      |                      |
|                      | <i>Prevotella</i> sp. oral taxon 472 str. F0295                       | 992              | 260910970 |                      |                      |
|                      | <i>Pseudoramibacter alactolyticus</i> ATCC 23263                      | 586              | 315926102 |                      |                      |
|                      | <i>Pseudoramibacter alactolyticus</i> ATCC 23263                      | 770              | 315926103 |                      |                      |
|                      | <i>Rhizobium etli</i> GR56                                            | 103              | 218671711 |                      |                      |
|                      | <i>Riemerella anatipestifer</i> ATCC 11845 = DSM 15868                | 1145             | 383485594 |                      |                      |
|                      | <i>Sphingobacterium spiritivorum</i> ATCC 33300                       | 116              | 227540450 |                      |                      |
|                      | <i>Sphingobacterium spiritivorum</i> ATCC 33300                       | 1306             | 227540451 |                      |                      |
|                      | <i>Staphylococcus massiliensis</i> S46                                | 475              | 425737243 |                      |                      |
|                      | <i>Staphylococcus massiliensis</i> S46                                | 581              | 425737242 |                      |                      |
|                      | <i>Staphylococcus simulans</i> ACS-120-V-Sch1                         | 1112             | 410878248 |                      |                      |
|                      | <i>Streptococcus agalactiae</i> 18RS21                                | 773              | 76799343  |                      |                      |
|                      | <i>Streptococcus downei</i> F0415                                     | 994              | 312866154 |                      |                      |
|                      | <i>Streptococcus dysgalactiae</i> subsp. <i>equisimilis</i> SK1249    | 538              | 417753185 |                      |                      |
|                      | <i>Streptococcus dysgalactiae</i> subsp. <i>equisimilis</i> SK1250    | 1155             | 417926916 |                      |                      |
|                      | <i>Streptococcus mutans</i> SA38                                      | 1229             | 449253007 |                      |                      |
|                      | <i>Streptococcus mutans</i> SA38                                      | 1229             | 449880497 |                      |                      |
|                      | <i>Streptococcus oralis</i> SK255                                     | 550              | 417794716 |                      |                      |
|                      | <i>Streptococcus oralis</i> SK255                                     | 670              | 417793840 |                      |                      |
|                      | <i>Streptococcus pseudoporcinus</i> SPIN 20026                        | 1326             | 313890160 |                      |                      |
|                      | <i>Streptococcus pyogenes</i> M49 591                                 | 1052             | 56808315  |                      |                      |
|                      | <i>Streptococcus sanguinis</i> VMC66                                  | 1167             | 323351495 |                      |                      |
|                      | <i>Streptococcus</i> sp. BS35b                                        | 93               | 401683465 |                      |                      |
|                      | <i>Streptococcus</i> sp. GMD4S                                        | 206              | 419816637 |                      |                      |
|                      | <i>Streptococcus</i> sp. GMD4S                                        | 317              | 419819606 |                      |                      |
|                      | <i>Streptococcus thermophilus</i> CNCM I-1630                         | 302              | 418027683 |                      |                      |
|                      | <i>Streptococcus thermophilus</i> CNCM I-1630                         | 595              | 418027684 |                      |                      |
|                      | <i>Streptococcus thermophilus</i> MTCC 5461                           | 39               | 445389093 |                      |                      |
|                      | <i>Streptococcus vestibularis</i> F0396                               | 97               | 312863468 |                      |                      |
|                      | <i>Streptococcus vestibularis</i> F0396                               | 1038             | 312863582 |                      |                      |
|                      | <i>Sutterella parvirubra</i> YIT 11816                                | 406              | 378822098 |                      |                      |
|                      | <i>Sutterella parvirubra</i> YIT 11816                                | 951              | 378821855 |                      |                      |
|                      | <i>Sutterella wadsworthensis</i> 2_1_59BFAA                           | 389              | 422348538 |                      |                      |
|                      | <i>Tannerella</i> sp. 6_1_58FAA_CT1                                   | 976              | 365118488 |                      |                      |
|                      | <i>Treponema denticola</i> ATCC 33520                                 | 631              | 449107910 |                      |                      |
|                      | <i>Treponema denticola</i> ATCC 33520                                 | 769              | 449107911 |                      |                      |
|                      | <i>Treponema denticola</i> F0402                                      | 357              | 422340642 |                      |                      |
|                      | <i>Treponema denticola</i> F0402                                      | 370              | 422340641 |                      |                      |
|                      | <i>Treponema denticola</i> F0402                                      | 631              | 422340640 |                      |                      |
|                      | <i>Treponema phagedenis</i> F0421                                     | 591              | 320536383 |                      |                      |
|                      | <i>Treponema phagedenis</i> F0421                                     | 738              | 320536384 |                      |                      |
|                      | <i>Treponema vincentii</i> ATCC 35580                                 | 281              | 257456747 |                      |                      |
|                      | <i>Treponema vincentii</i> ATCC 35580                                 | 992              | 257456748 |                      |                      |
|                      | uncultured bacterium                                                  | 600              | 406975829 |                      |                      |
|                      | uncultured bacterium                                                  | 1017             | 406999582 |                      |                      |
|                      | uncultured bacterium T3_7_42578                                       | 675              | 411001094 |                      |                      |
|                      | uncultured Termite group 1 bacterium phylotype Rs-D17                 | 166              | 189485058 |                      |                      |
|                      | uncultured Termite group 1 bacterium phylotype Rs-D17                 | 1032             | 189485225 |                      |                      |
|                      | <i>Verminephrobacter aporrectodeae</i> subsp. <i>tuberculatae</i> At4 | 983              | 347820874 |                      |                      |

<sup>a</sup>Cas9 sequences are grouped according to the BLASTClust clustering program. Truncated sequences were not selected for the clustering and are listed at the bottom of the table without any cluster number (see Materials and Methods).

<sup>b</sup>Bacterial strains harboring a *cas9* orthologous gene are listed; GI, GenInfo Identifier. Bold, cluster representatives chosen for the alignment and tree reconstruction (Supplementary Figures S1 and S2). Grey, discarded, incomplete Cas9 sequences (see Materials and Methods). Note that the incomplete sequences were all confirmed to be truncated Cas9 orthologs based on the presence of conserved motifs and/or similarity to other Cas9 orthologs.

<sup>c</sup>Cas1 GenInfo Identifier of the representative sequences chosen for the alignment and tree reconstruction are given (Supplementary Figures S2 and S3). Grey, discarded, incomplete sequences. Whenever possible, an alternative Cas1 sequence from the same cluster as that of the discarded Cas1 sequence was selected (clusters 8, 9 and 21, in bold).

<sup>d</sup>Subtype of the CRISPR-Cas loci belonging to a same Cas9 cluster as inferred from the representative Cas1 and Cas9 tree topology.

227494853 *Actinomyces coleoscanis* DSM 15436#  
227824983 *Coriobacterium glomerans* FW2  
303229466 *Acidimandibularium* sp. D21  
303229466 *Veillonella atypica* ACS-134-V-Col7a  
374362592 *Fusobacterium nucleatum* ATCC 49256  
374307738 *Filifactor aloccis* ATCC 35896  
320528778 *Solobacterium moorei* F0204  
291520705 *Coprococcus catus* GJ-7  
42525843 *Tronema denitratia* ATCC 35405  
304338954 *Peptoniphilus durdenii* ATCC BAA-1640  
224543312 *Catenibacterium mitsukoi* DSM 15897  
116628213 *Streptococcus thermophilus* LMD-9  
24379809 *Streptococcus mutans* UA159  
13622193 *Streptococcus pyogenes* SF370  
310286728 *Bifidobacterium bifidum* S17  
42525843 *Streptococcus kitasatoii* ATCC 17330  
422848106 *Streptococcus sanguinis* SK49  
339625081 *Fructobacillus fructuosus* KCTC 3544  
306281691 *Eubacterium yurii* ATCC 43715  
336394882 *Lactobacillus farcininus* KCTC 3681  
324363801 *Staphylococcus pseudintermedius* ED99  
389815359 *Planococcus antarcticus* DSM 14505  
336394882 *Planococcus ammannus* ATCC 35896  
169823755 *Finogoldia magna* ATCC 29328  
Jnet  
227501312  
47458868 *Mycoplasma mobile* 163K  
284931710 *Mycoplasma gallisepticum* str. F  
71894592 *Mycoplasma synoviae* 53  
363542550 *Mycoplasma ovipneumoniae* SC01  
363542550 *Mycoplasma pneumoniae* SC01  
238924075 *Eubacterium rectale* ATCC 33656  
315149830 *Enterococcus faecalis* XJ0012  
116627542 *Streptococcus thermophilus* LMD-9  
315659848 *Staphylococcus lugdunensis* M23590  
160915782 *Eubacterium dolichum* DSM 3991  
325677756 *Ruminococcus albus* 8  
374362592 *Streptococcus thermophilus* LMD-9  
336393381 *Lactobacillus coryniformis* KCTC 3535  
310780384 *Llyobacter polytropus* DSM 2926  
301311869 *Bacteroides* sp. 20 3  
385811609 *Ignavibacterium album* JCM 16511  
60683389 *Bacteroides fragilis* NCTC 9343  
319957206 *Nitratifactor saluspinis* DSM 16511  
187250660 *Elusimicrobium minutum* Pe191  
325972003 *Sphaerochaeta globus* str. Buddy  
296446027 *Methylosinus trichosporium* Ob3b  
374362497 *Flavobacterium branchiophilum* Fl-15  
345885718 *Prevotella* sp. c561  
282880052 *Prevotella timonensis* CRIS 5C-B1  
312879015 *Aminomonas paucivirans* DSM 12260  
340089611 *Paracoccus luteus* ATCC 35461  
330828845 *Alicyclyphillus denitrificans* K601  
344171927 *Ralstonia szygii* R24  
159042956 *Dinoroseobacter shibae* DFL 12  
83591793 *Rhodospirillum rubrum* ATCC 11170  
288957741 *Azospirillum* sp. B510  
442729481 *Cenozoopirillum salinarum* AK4  
92109252 *Nitrobacter hamburgensis* X14  
148255343 *Bradyrhizobium* sp. B2A11  
34557790 *Wolinella succinogenes* DSM 1740  
218563121 *Campylobacter jejuni* NCTC 11168  
218563121  
Jnet  
221276265 *Helicobacter mustelae* 12198  
422109285 *Acidovorax ebbeus* TFSY  
315605738 *Acidovorax* sp. oral 17FAA  
220930482 *Clostridium cellulolyticum* H10  
297182908 *uncultured delta proteobact.* HF000 07E19  
154250555 *Parvibaculum lavamentivorans* DS-1  
218767588 *Neisseria meningitidis* Z2491  
156022992 *Pasteurella multocida* str. Em70  
187736489 *Akkermansia muciniphila* ATCC BAA-835  
315605738 *Actinomyces* sp. oral 17FAA  
117929158 *Acidothermus cellulolyticus* 11B  
189440764 *Bifidobacterium longum* DJO10A  
403744858 *Alicyclobacillus hesperidum* URH17-3-68  
403780669 *Alcanivorax* sp. W11-5  
423317190 *Bergeyella zoohelium* ATCC 43767  
282847315 *Porphyromonas* sp. oral tatum 279 str. F0450  
42525843 *Francisella tularensis* str. Paris  
374384763 *Odoribacter lanicus* YIT 12061  
384109266 *Tronema* sp. JC4  
402849997 *Rhodovulum* sp. PH10  
331001027  
Jnet  
331001027 *Parasutterella excrementihominis* YIT 11859  
345577932 *Wolinella succinogenes* DSM 1740  
42525843 *Francisella tularensis* str. Paris  
319941583 *Sutterella wadsworthensis* 3 1 45B  
254447899 *gamma proteobact.* HTCC5015  
118497352 *Francisella novicida* U112

Motifs  
informative positions  
5 RuvC I ( RRR )

**Supplementary Figure S2. Multiple sequence alignment of representative Cas9 sequences (following Table S2 and Material and Methods).** The rows described as Jnet with following GI identifier of a selected Cas9 sequence provide the predicted secondary structure of Cas9 within the corresponding subgroups (sequences indicated below each Jnet). Conserved motifs are marked below the alignment and the mutated amino acid residues are highlighted. Asterisks indicate informative positions chosen for the Cas9 tree reconstruction.

227494853 Actinomyces colocoensis DSM 15436#  
328956315 Coriobacterium glomerans FW2  
227824983 Acidaminococcus sp. D21  
303229466 Veillonella atypica ACS-134-V-Col7a  
34762592 Fusobacterium nucleatum ATCC 49256  
374307738 Filifactor alovis ATCC 35896  
320528778 Coprobacterium moorei F0204  
291520705 Symbiobacterium GD-7  
42525843 Treponema denticola ATCC 35405  
304438954 Peptoniphilus duerdenii ATCC BAA-1640  
224543312 Catenibacterium mitsuokai DSM 15897  
116628213 Streptococcus thermophilus LMD-9  
24379809 Streptococcus mutans UA159  
13622193 Streptococcus pyogenes SF370  
310286728 Bifidobacterium bifidum S17  
364983953 Omococcus kitaharae DSM 17330  
422884106 Streptococcus sanguinis SK49  
339625081 Fructobacillus fructosus KCTC 3544  
306821691 Eubacterium yurii ATCC 43715  
336394882 Lactobacillus farciminus KCTC 3681  
323463801 Staphylococcus pseudintermedius EP99  
389815359 Planococcus antarcticus DSM 14505  
258509199 Lactobacillus rhamnosus GG  
169823755 Finegoldia magna ATCC 29328  
Jnet  
227501312  
47458868 Mycoplasma mobile 163K  
284931710 Mycoplasma gallisepticum str. F  
71894592 Mycoplasma synoviae 53  
363542550 Mycoplasma canis SC01  
384392826 Mycoplasma canis FC 14  
238924075 Eubacterium rectale ATCC 33656  
315149830 Enterococcus faecalis TX0012  
116627542 Streptococcus thermophilus LMD-9  
315659848 Staphylococcus lugdunensis M23590  
160915782 Eubacterium dolichum DSM 3991  
325677756 Ruminococcus albus 9  
225377804 Roseburia inulinivorans DSM 16841  
336393381 Lactobacillus coryniformis KCTC 3535  
310780384 Ilyobacter polytropus DSM 2926  
Bacteroides sp. 20 3  
301311869 Ignavibacterium album JCM 16511  
60683389 Bacteroides fragilis NCTC 9343  
311987206 Nitrosifactor saulspis DSM 16511  
187250660 Elusimicrobium minutum Pe191  
325972003 Sphaerochaeta globus str. Buddy  
296446027 Methylosinus trichosporium OB3b  
347536497 Flavobacterium brachiophilum FL-15  
345885718 Prevotella sp. C561  
282880052 Prevotella limonenensis CRIS 5C-B1  
312879015 Aminomonas pascuiphila DSM 12260  
294086111 Candidatus Puniceispirillum marinum IMCC1322  
330822845 Alicyclophilus denitrificans K601  
344171927 Ralstonia syzygii R24  
159042956 Dinoroseobacter shibae DFL 12  
83591793 Rhodospirillum rubrum ATCC 11170  
288957741 Azospirillum sp. B510  
427429481 Caenospirillum salinarum AK4  
92109262 Nitrobacter hamburgensis X14  
148255343 Bradyrhizobium sp. BTA11  
34557790 Wolinella succinogenes DSM 1740  
218563121 Campylobacter jejuni NCTC 11168  
Jnet  
218563121  
291276265 Helicobacter mustelae 12198  
222109285 Acidovorax ebrensens TP5Y  
365156657 Bacillus smithii 7 3 47FAA  
220930482 Clostridium cellulolyticum H10  
297182908 uncultured delta proteobact. HF0070 07E19  
154250555 Parvibaculum lavamentivorans DS-1  
218767588 Neisseria meningitidis Z2491  
15602992 Pasteurella multocida str. Em70  
347736489 Akkermansia muciniphila ATCC 2749-835  
315605738 Actinomyces sp. oral taxon 180 str. F0310  
117929158 Acidothermus cellulolyticus 11B  
189440764 Bifidobacterium longum DJO10A  
403744858 Alicyclobacillus hesperidum URH17-3-68  
407803669 Alcanivorax sp. W11-5  
423317190 Bergeyella zoohelium ATCC 43767  
402847315 Parviphysomonas sp. oral taxon 279 str. F0450  
404487228 Bacteriella intestinihominis YIT 11860  
374384763 Odoribacter lanus YIT 12061  
384109266 Treponema sp. JC4  
402849997 Rhodovulum sp. PH10  
Jnet  
331001027  
331001027 Parasutterella excrementihominis YIT 11859  
Wolinella succinogenes DSM 1740  
54296138 Legionella pneumophila str. Paris  
319941583 Sutterella wadsworthensis 3 1 45B  
254447899 gamma proteobact. HTCC5015  
118497352 Francisella novicida U112

Motifs  
Informative positions

E R



















227494853 *Actinomyces coleocanis* DSM 15436#

328956315 *Coriobacterium glomerans* FW2

227824983 *Acidaminococcus* sp. D21

303229466 *Veillonella atypica* ACS-134-V-Col7a

34762592 *Fusobacterium nucleatum* ATCC 49256

374307738 *Filifactor aloicis* ATCC 35896

320528778 *Solobacterium moorei* F0204

291520705 *Coprococcus catus* GD-

42525843 *Treponema dentitcola* ATCC 35405

304438954 *Peptoniphilus duerdenii* ATCC BAA-1640

224543312 *Catenibacterium mitsuokai* DSM 15897

116628213 *Streptococcus thermophilus* LMD-9

24379809 *Streptococcus mutans* UAL159

13622193 *Streptococcus pyogenes* SF370

310286728 *Bifidobacterium bifidum* B17

366983953 *Streptococcus kitaharae* ATCC 17330

422884106 *Streptococcus sanguinis* SK49

339625081 *Fructobacillus fructosus* KCTC 3544

306821691 *Eubacterium yurii* ATCC 43715

336394882 *Lactobacillus farciminis* KCTC 3681

323463801 *Staphylococcus pseudintermedius* ED99

389815359 *Planococcus antarcticus* DSM 14505

408509195 *Lactobacillus tharogus* G6

169823755 *Finegoldia magna* ATCC 29328

Jnet 227501312

47458868 *Mycoplasma mobile* 163K

284931710 *Mycoplasma gallisepticum* str. F

71894592 *Mycoplasma synoviae* 53

363542550 *Mycoplasma ovipneumoniae* SC01

384393284 *Mycoplasma fermentans* 14

238924075 *Eubacterium rectale* ATCC 33656

315149830 *Enterococcus faecalis* TX0012

116627542 *Streptococcus thermophilus* LMD-9

315659848 *Staphylococcus lugdunensis* M23590

160915782 *Eubacterium dolichum* DSM 3991

325677756 *Ruminococcus albus* 8

225377804 *Roseburia inulinivora* DSM 16841

336393381 *Lactobacillus coryniformis* KCTC 3535

310780384 *Ilyobacter polytropus* DSM 2926

301311869 *Bacteroides* sp. 20 3

385811609 *Ignavibacterium album* JCM 16511

60683389 *Bacteroides fragilis* NCTC 9343

319957206 *Nitratifactor salisuginis* DSM 16511

187250660 *Elusimicrobium mitum* Pei191

325972003 *Sphaerochaeta globus* str. Buddy

296446027 *Methylosinus trichosporium* CB3b

347536497 *Flavobacterium branchiophilum* FL-15

345885718 *Prevotella* sp. C561

282880052 *Prevotella timonensis* CRIS 5C-B1

312879015 *Aminomonas paucivorans* DSM 12260

294086111 *Cardiatus Functispirillum marinum* IMCC1322

330822845 *Alicyclophilus denitrificans* K601

344171927 *Ralstonia szygii* R24

159042956 *Dinoroseobacter shibae* DFL 12

83591793 *Rhodospirillum rubrum* ATCC 11170

288957741 *Azospirillum* sp. B510

427429481 *Caenispirillum salinarum* AK4

92109262 *Nitrobacter hamburgensis* X14

148255343 *Bradyrhizobium* sp. BTA11

34557790 *Wolinella succinogenes* DSM 1740

218563121 *Campylobacter jejuni* NCTC 11168

Jnet 218563121

291276265 *Helicobacter mustelae* 12198

222109285 *Acidovorax ebursus* TFSY

365156657 *Bacillus smithii* 7 3 47FAA

220930482 *Clostridium cellulolyticum* H10

297182908 *uncultured delta proteobact.* HF0070 07E19

154250555 *Parvibaculum lavamentivorans* DS-1

218767588 *Neisseria meningitidis* Z2491

15602992 *Pasteurella multocida* str. Pm70

187736489 *Akkermansia muciniphila* ATCC BAA-835

315605738 *Actinomyces* sp. oral taxon 180 str. F0310

117929158 *Acidothermus cellulolyticus* 11B

189440764 *Bifidobacterium longum* DJ010A

403744858 *Alicyclobacillus hesperidum* URH17-3-68

407803669 *Alcanivorax* sp. W11-5

423317190 *Bergeyella zoohelcum* ATCC 43767

282847315 *Porphyromonas* sp. oral taxon 279 str. F0450

404487228 *Francisella tularensis* YIT 11860

374384763 *Odoribacter laneus* YIT 12061

384109266 *Treponema* sp. Jc4

402849997 *Rhodovulum* sp. PH10

Jnet 331001027

331001027 *Parasutterella excrementihominis* YIT 11859

34557932 *Wolinella succinogenes* DSM 1740

54296128 *Levinsella pneumophila* str. Paris

319941583 *Sutterella wadsworthensis* 3 1 45B

254447899 *gamma proteobact.* HTCC5015

118497352 *Francisella novicida* U112

TSAARKAS-----GFE-----SR-----

SHDFAR-----ELV-----KC-----

SSDFRHEP-----GLV-----KS-----

VSDFRHNN-----NFI-----KV-----

ASSFREMP-----DFI-----KV-----

VSDFRKPL-----NYL-----KS-----

VSEFRNRKD-----KELP-----KF-----

VSNFRQTY-----ELL-----KV-----

VSMFRKPT-----DFV-----KC-----

ASRFRQEP-----DII-----KC-----

SHEFRVKN-----HIY-----KN-----

VSQFRKDF-----ELY-----KV-----

VSNFRKEF-----ELY-----KV-----

VSDFRKDF-----QFY-----KV-----

TREMHYLY-----GFS-----HK-----

TADMFRYV-----DII-----KC-----

ITNFRNTE-----HIA-----K-----

TADMRLLV-----GIK-----K-----

VSEFRHKEF-----ELF-----K-----

STAFRRKALSGQDDTYHFHFP-----ELV-----K-----

VSEFRKFF-----DIP-----K-----

VSKFRFFS-----ELP-----K-----

SQRLRQEL-----DFP-----KC-----

ASDLRQDM-----NTL-----KS-----

HHHHHH-----

TSNLRNQIAFVGIKNNKETEREW-KRPEGFK-----SI-----

TSFLRKNFD-----DSVYA-----KK-----

TSFLRKSMM-----RKN-----EE-----

TKYFRKPVQRKNGPNEN-----LNKK-----PE-----

TSFLRKNF-----SYDN-----K-----

THQMRGNL-----KLD-----KN-----

THTLRKKW-----GAD-----LD-----

TSQLRRHW-----GIE-----KT-----

TDYLRRKW-----KFK-----KE-----

TNAFRKRI-----NLK-----KD-----

TSMFRRW-----LN-----EK-----

TSYLRRKW-----GLM-----K-----

TSKLRSSW-----GFL-----KV-----

TAQLRARW-----RLN-----KV-----

TDRLKRDW-----GIN-----DVMNKIVLPRFIRL-----

TSELKITW-----GLN-----GVWKDLRPRFKRL-----

TDKLRDWD-----QLI-----DV-----M-----

TSKFRSLL-----GIK-----SK-----

TSFLRKNF-----GLM-----K-----

TSLLRKA-----NLQ-----GI-----

TDRLRRAW-----GLQ-----WM-----

VAEFRKII-----GIQ-----ES-----

TAKFRKIL-----GIQ-----SV-----

TAEFRKMW-----GLQ-----SE-----

TAFLRQKW-----GLH-----KN-----

TSFLRKNF-----GLM-----K-----

TALLRCKE-----GLN-----DV-----

TAMLRKAW-----GLN-----RV-----

TEMLRRHW-----GLN-----SL-----

TGLLRRAW-----DITTPGAPRDLPTPRDALRDDTAARRFLDGLTFFPLAKAVEGAVQ-----

TALLRRRW-----GID-----AI-----

ISRVFRVW-----GSVTMHLRQLLRQDRKNDYQTHHAEDACLLLAGFA-----

TSMLRKKW-----GLN-----K-----

TALLRATW-----ELN-----DL-----

TSVLRQW-----GLE-----SK-----

TSALRHTW-----GFS-----AK-----

HHHHHH-----

TSMRSFW-----GVO-----EK-----

TFLRARW-----GLT-----KV-----

TAMLRSSW-----DFN-----KN-----

TAQLRSSW-----GLN-----KN-----

TGYLRKOW-----GLE-----

TAQLRKLW-----TLN-----NI-----

TNLLRGFW-----GLR-----KV-----

TALLRSRW-----GLI-----KA-----

TAEVRKAW-----DVF-----GV-----

TACARRAK-----HVD-----KR-----

TAEARRWL-----DISIE-----RL-----

TASARRAA-----GIE-----GK-----

TAYMRARW-----GLT-----KD-----

TAELRRRW-----GLD-----TVIPOVRFESG-MPVVDEEGAEI-----TPEEFKFRLOWEGRVTRMRTDRR-----

TDYLRNHW-----GLT-----DKFKLLHERY-EALLESEKFLAEYDNYKDFDRKRKEYEKEVLFEBQELTREEPTKEYKENYIRYKKNKLIIGWS-----

TARLSRLW-----GYG-----KILHTLNLDRY-DSMGTERV-----SREGATEEELHTNWS-----

TKLRRKRW-----GND-----EVLHRLNDRY-KKVGTEVIEV-----NHSSVIRERQKWS-----

TAELRLHLW-----GLN-----NLQSAPDIFPLPVSAATENHREYVITNEQWIRLFRKQGETPRTEKCELLTGEVEKRVFKPCGMQEPQDVSQDKYWRRLKLSVSSVWSPLFAPKPIADGQIVLKGRIKGVFVNCQKQKLTGPDGYSMIL-----

TKLRDKW-----EMD-----

TGLLRARW-----GLN-----SIL-----

HHHHHH-----HHHHHHHHHHHH-----EEEEEE-----HHHHHHHHHHHH-----HEE-----

AMFVRSIF-SKVRQALAAWQETGNELIFDAISVPA-----ADSEMRKRPAEYRPEFRK-----

KYLAKIQ-EKLTML-----FNKHLSPFLADA-----TEVSELRQPARQNPFLAK-----

KFLSKRIM-EFLSTLA-----DSKQLQELFISQITP-----EVLHRLNDRY-KKVGTEVIEV-----NHSSVIRERQKWS-----

INMKLNLA-NKLRREEQNWCKTNNRHLFQAANTV-----SDAKNLRKLAQNQDFEK-----

AWLAKIA-SLLAEHL-----DKGRDYLSAHDIDP-----WSVSKQRKMLSAEPIWAK-----

RYFAEVLN-NNIYLRN-KKENLNTDKISFDYFGIPTGNG-----RGLAETRLQLEKVDSDIQAYAK-----

Motifs  
informative positions

R  
\*\*\*\*\*







227494853 Actinomyces coelestis DSM 154366  
329956315 Coriobacterium glomerans FW2  
227824983 Acidaminococcus sp. D21  
303229466 Veillonella atypica ACS-134-V-Col7a  
34762592 Fusobacterium nucleatum ATCC 49256  
374307738 Filifactor aloccis ATCC 35896  
320528778 Solobacterium moorei F0204  
321520705 Coprococcus catus G0-  
42525843 Treponema dentale ATCC 35405  
304438954 Peptoniphilus duerdenii ATCC BAA-1540  
224543312 Catenibacterium mitsuoaii DSM 15897  
116628213 Streptococcus thermophilus LMD-9  
24379809 Streptococcus mutans UAl59  
13622193 Streptococcus pyogenes SF370  
310286728 Bifidobacterium bifidum B17  
364983953 Clostridium kluyveri DSM 17330  
422894106 Streptococcus sanguinis SK49  
339625081 Fructobacillus fructosus KCTC 3544  
306821691 Eubacterium yurii ATCC 43715  
336394882 Lactobacillus farcinimus KCTC 3681  
323463801 Streptococcus pseudintermedius ED99  
389815359 Planococcus antarcticus DSM 14505  
385691832 Lactobacillus helveticus G6  
169823755 Finegoldia magna ATCC 29328  
Jnet 227501312  
47458868 Mycoplasma mobile 163K  
284931710 Mycoplasma gallisepticum str. F  
71894592 Mycoplasma synoviae 53  
363542550 Mycoplasma pneumoniae SC01  
384393286 Mycoplasma chlamydii F014  
238924075 Eubacterium rectale ATCC 33656  
315149830 Enterococcus faecalis TX0012  
116627542 Streptococcus thermophilus LMD-9  
315659848 Streptococcus lugdunensis M23590  
160915782 Eubacterium dolichum DSM 3991  
325677756 Ruminococcus albus 8  
225377804 Roseburia inulinivans DSM 16841  
336393381 Lactobacillus coryniformis KCTC 3553  
310780384 Ilyobacter polytropus DSM 2926  
301311869 Bacteroides sp. 20 3  
385811609 Ignavibacterium album JCM 16511  
60683389 Bacteroides fragilis NCTC 9343  
319957206 Nitratifactor saaluginis DSM 16511  
187250460 Elusimicrobium mitium Pei191  
325972003 Sphaerochaeta globosa str. Buddy  
296446027 Methylosinus trichosporium CB3b  
347536497 Flavobacterium branchophilum FL-15  
345858718 Prevotella sp. C561  
282800052 Prevotella timonensis CRIS 5C-1  
312879015 Aminomonas paucivorans DSM 12260  
294086111 Clostridium butyricum DSM IMCC1322  
330828245 Alicyclophillus denitrificans K601  
344171927 Ralstonia syygii R24  
159042956 Dinoroseobacter shibae DFL 12  
83591793 Rhodospirillum rubrum ATCC 11170  
288957741 Azospirillum sp. B510  
427429481 Caenospirillum salinarum AK4  
92109262 Nitrobacter hamburgensis X14  
148255343 Bradyrhizobium sp. BTAA1  
34557790 Wolinella succinogenes DSM 1740  
218563121 Campylobacter jejuni NCTC 11168  
Jnet 218563121  
291276265 Helicobacter mustelae 12198  
222109285 Acidovorax ebrewus TFSY  
365156657 Bacillus smithii 7 3 47PA  
220930482 Clostridium cellulolyticum H10  
291782908 uncultured delta proteobact. HF0070 07E19  
154255055 Parvibaculum lavamentivorans DS-1  
218767588 Neisseria meningitidis Z2491  
15602992 Pasteurella multocida str. Pm70  
187736489 Akkermansia muciniphila ATCC BAA-835  
315605738 Actinomyces sp. oral taxon 180 str. F0310  
117929158 Acidothermus cellulolyticus 11B  
189440764 Bifidobacterium longum DJo10A  
403744858 Alicyclobacillus hesperidum URH17-3-68  
Alcanivorax sp. W11-5  
423317190 Bergyella zoohelcum ATCC 43767  
402847315 Porphyromonas sp. oral taxon 279 str. F0450  
404487228 Bartonella pneumophila str. Paris  
374384763 Odoiribacter laneus YIT 12061  
384109266 Treponema sp. Jc4  
402849997 Rhodovulum sp. PH10  
331001027 Jnet 331001027  
331001027 Parasuterrella excrementihominis YIT 11859  
34557932 Wolinella succinogenes DSM 1740  
54296138 Lactonella pneumophila str. Paris  
319941583 Sutterella wadswothensis 3 1 45B  
254447899 gamma proteobact. HTCC5015  
118497352 Francisella novicida U112

---TKLQMHVGDWSLVEIDRAST---FALWALCALTR---QPDFFWRQDGL---PANEEDRTIIVNGTHYGLDVRGVTF---GKAASALVVRGG---SVDIGISA  
---FRACKTALPLRQGLN---FBIYGSFAPFVYRLSAGIIFERRK---EQTLFEJFIQVYRSLAGIIFQEDNA---LEIFARELAKD---QGLELRF  
---KASTGLVBRKAGLD---VWYGYDVKSTAAAYLLVRFPLED---EQIYRQKHLMI---PVEGLYKARIID---HDRPELYTDA---QTTISEI  
SVAAKAKAGYA1GMKTQYISVAD---VTKYGDMTKIKNAYS11VQVGTGKK---GEIETKVE1PLTYLINRNATIDEL---IDVYSV1PKARDI51KYR---KLCINOL  
KGETSNE1S1IKPKLYDGRDNKL---NEKYGYTS1KAAYF1VVEHEKNNK---KVKTFER1TRIDST1LNKEK1LK---KVKTFER1TRIDST1LNKEK1LK---KVKTFER1TRIDST1LNKEK1LK  
---QNKNGNSVSLKGLD---VKYGGVFSANTYSFSLIEF---EDKGDNRARH---1IGVPIYIANN---ERSLETVYIK---DVELYLDQFIK---YCESV---LGLKEPQ  
---VFKRGQFP1KQGRD---IEKYGVNKL5SAAF1FAVEYIGKRRAR---E1RTIETVPFL---Y1KQI0E1NH8E---SATQYLAQREKNDK---PEILLSEK  
---MKRGQG1P1HGNDRLEAD---IEKYGVNKL5SAAF1FAVEYIGKRRAR---E1RTIETVPFL---Y1KQI0E1NH8E---SATQYLAQREKNDK---PEILLSEK  
---MKRGQGF1P1HGNDRLEAD---IEKYGVNKL5SAAF1FAVEYIGKRRAR---E1RTIETVPFL---Y1KQI0E1NH8E---SATQYLAQREKNDK---PEILLSEK  
---MRNGQT1P1KQENTNKSN---TSLYGGFSNKAFAV1VLESKQ---KTRLNVNMGQ---EYSLLDGRFSD---DELKRYLAKRKE---YARANIL  
SNDHADHAGKVTAV1P1VFNKNSD---VHKYGGFSGLYQTVIAEGQKRRKQ---KTLVVKISGV1PLHKAASINEKI---KTLVVKISGV1PLHKAASINEKI---KTLVVKISGV1PLHKAASINEKI  
---KPKNSNEMLVGAKEYL---PKYGGVYAG1SNSTFV1KGT1EIKG---AKK1TNVLEFQGIS1LDRINRYK---AKK1TNVLEFQGIS1LDRINRYK---AKK1TNVLEFQGIS1LDRINRYK  
---LPGNSDKL1PRKTKFYWD---TKKYGGFSD1V1AVS1LVIADIEKG---KSKLKT1KVVLGV1T1EMKTFER---KSKLKT1KVVLGV1T1EMKTFER---KSKLKT1KVVLGV1T1EMKTFER  
---LPKNSDKL1LARKDWD---PKYGGFSD1V1AVS1V1AVKVEKG---KSKLKS1V1KELLG1T1MERSSFEK---KSKLKS1V1KELLG1T1MERSSFEK---KSKLKS1V1KELLG1T1MERSSFEK  
---ATDPKRG1FG1PFDGAKDQ---TSLYGGFSNKAFAV1VLESKQ---KTRLNVNMGQ---EYSLLDGRFSD---DELKRYLAKRKE---YARANIL  
---KMRGQGS1T1HGNDRLEAD---IEKYGVNKL5SAAF1FAVEYIGKRRAR---E1RTIETVPFL---Y1KQI0E1NH8E---SATQYLAQREKNDK---PEILLSEK  
---KFKNG1QANN1RYP1LTKALCLD---TSLYGGVPMNSALS11IAERFEN---KKG1IT1EYKRFH---DI1F1DYEKFN---KLL1KI1PI1SIA---NQ1E1VGNL1KN  
---FKS---GK1L1P1LNSKRS---TALYGGFSD1V1AVS1V1AVKVEKG---KSKLKS1V1KELLG1T1MERSSFEK---KSKLKS1V1KELLG1T1MERSSFEK---KSKLKS1V1KELLG1T1MERSSFEK  
---ADKTKFPN1Q1AYRF1KTS---DERLNC---ILRYGGRTS1S1SGCY1V1EYK---KRT1RS1EA1P---VY1LGR1KDSLSE---KRT1RS1EA1P---VY1LGR1KDSLSE---KRT1RS1EA1P  
---PNFKYK1LAQKRD---M1D---NY1GGFSD1V1AVS1V1AVKVEKG---KSKLKS1V1KELLG1T1MERSSFEK---KSKLKS1V1KELLG1T1MERSSFEK---KSKLKS1V1KELLG1T1MERSSFEK  
---PKTAL1K1VE1SKNS---EVVYKGLT1PYQ1VVA1K1SVNK---KGEK1ME1QM1D---HV1FDF1YKFNQ---GNEK1L1A1YQ1A1K1E1NDK---VLD1AQ1  
---KTPDGAK1V1SPKTE---TSLYGGFSNKAFAV1VLESKQ---KTRLNVNMGQ---EYSLLDGRFSD---DELKRYLAKRKE---YARANIL  
---AKDRGQGS1T1HGNDRLEAD---IEKYGVNKL5SAAF1FAVEYIGKRRAR---E1RTIETVPFL---Y1KQI0E1NH8E---SATQYLAQREKNDK---PEILLSEK  
---KDKVYK1G1Y1L1LK1DD1R1DQ1---VSKYGGYK1N1GA1F1V1EHTKS---KKR1RS1E1L1P1S1IA---NQ1E1VGNL1KN---KLL1KI1PI1SIA---NQ1E1VGNL1KN  
Jnet 227501312  
47458868 Mycoplasma mobile 163K  
284931710 Mycoplasma gallisepticum str. F  
71894592 Mycoplasma synoviae 53  
363542550 Mycoplasma pneumoniae SC01  
384393286 Mycoplasma chlamydii F014  
238924075 Eubacterium rectale ATCC 33656  
315149830 Enterococcus faecalis TX0012  
116627542 Streptococcus thermophilus LMD-9  
315659848 Streptococcus lugdunensis M23590  
160915782 Eubacterium dolichum DSM 3991  
325677756 Ruminococcus albus 8  
225377804 Roseburia inulinivans DSM 16841  
336393381 Lactobacillus coryniformis KCTC 3553  
310780384 Ilyobacter polytropus DSM 2926  
301311869 Bacteroides sp. 20 3  
385811609 Ignavibacterium album JCM 16511  
60683389 Bacteroides fragilis NCTC 9343  
319957206 Nitratifactor saaluginis DSM 16511  
187250460 Elusimicrobium mitium Pei191  
325972003 Sphaerochaeta globosa str. Buddy  
296446027 Methylosinus trichosporium CB3b  
347536497 Flavobacterium branchophilum FL-15  
345858718 Prevotella sp. C561  
282800052 Prevotella timonensis CRIS 5C-1  
312879015 Aminomonas paucivorans DSM 12260  
294086111 Clostridium butyricum DSM IMCC1322  
330828245 Alicyclophillus denitrificans K601  
344171927 Ralstonia syygii R24  
159042956 Dinoroseobacter shibae DFL 12  
83591793 Rhodospirillum rubrum ATCC 11170  
288957741 Azospirillum sp. B510  
427429481 Caenospirillum salinarum AK4  
92109262 Nitrobacter hamburgensis X14  
148255343 Bradyrhizobium sp. BTAA1  
34557790 Wolinella succinogenes DSM 1740  
218563121 Campylobacter jejuni NCTC 11168  
Jnet 218563121  
291276265 Helicobacter mustelae 12198  
222109285 Acidovorax ebrewus TFSY  
365156657 Bacillus smithii 7 3 47PA  
220930482 Clostridium cellulolyticum H10  
291782908 uncultured delta proteobact. HF0070 07E19  
154255055 Parvibaculum lavamentivorans DS-1  
218767588 Neisseria meningitidis Z2491  
15602992 Pasteurella multocida str. Pm70  
187736489 Akkermansia muciniphila ATCC BAA-835  
315605738 Actinomyces sp. oral taxon 180 str. F0310  
117929158 Acidothermus cellulolyticus 11B  
189440764 Bifidobacterium longum DJo10A  
403744858 Alicyclobacillus hesperidum URH17-3-68  
Alcanivorax sp. W11-5  
423317190 Bergyella zoohelcum ATCC 43767  
402847315 Porphyromonas sp. oral taxon 279 str. F0450  
404487228 Bartonella pneumophila str. Paris  
374384763 Odoiribacter laneus YIT 12061  
384109266 Treponema sp. Jc4  
402849997 Rhodovulum sp. PH10  
331001027 Jnet 331001027  
331001027 Parasuterrella excrementihominis YIT 11859  
34557932 Wolinella succinogenes DSM 1740  
54296138 Lactonella pneumophila str. Paris  
319941583 Sutterella wadswothensis 3 1 45B  
254447899 gamma proteobact. HTCC5015  
118497352 Francisella novicida U112

Motifs  
informative positions









16130662 Escherichia coli str. K-12 substr. MG1655  
11500011 Archaeoglobus fulgidus DSM 4304  
18977490 Pyrococcus furiosus DSM 3638  
46447796 Desulfovibrio vulgaris str. Hildenborough  
54296139 Legionella pneumophila str. Paris  
331001028 Parasutterella excrementihominis YIT 11859  
319941582 Sutterella wadsworthensis 3 1 45B  
118497353 Francisella novicida U112  
34557933 Wolinella succinogenes DSM 1740  
187736488 Akkermansia muciniphila ATCC BAA-835  
407803668 Alcanivorax sp. W11-5  
325972002 Sphaerochaeta globus str. Buddy  
187250661 Elusimicrobium minutum Peil191  
47458867 Mycoplasma mobile 163K  
363542551 Mycoplasma ovipneumoniae SC01  
71894593 Mycoplasma synoviae 53  
384393287 Mycoplasma canis PG 14  
284931711 Mycoplasma gallisepticum str. F  
117929157 Acidothermus cellulolyticus 11B  
317482065 Bifidobacterium sp. 12 1 47BFAA  
315605739 Actinomyces sp. oral taxon 180 str. F0310  
294086112 Candidatus Punciceispirillum marinum IMCC1322  
282800533 Prevotella timonensis CRIS 5c-B1  
374384762 Odoribacter lanus YIT 12061  
423317188 Bergeyella zoohelcum ATCC 43767  
385811610 Ignavibacterium album JCM 16511  
402847305 Porphyromonas sp. oral taxon 279 str. F0450  
345885719 Prevotella sp. C561  
404487227 Barnesella intestihominis YIT 11860  
301311870 Bacteroides sp. 20 3  
60683388 Bacteroides fragilis NCTC 9343  
402849966 Rhodovulum sp. PH10  
154250554 Parvibaculum lavamentivorans DS-1  
159042957 Dinoroseobacter shibae DFL 12  
288957740 Azospirillum sp. B510  
330822846 Alicyclophagus denitrificans K601  
344171926 Ralstonia snyderii R24  
319957207 Nitratifactor salusginis DSM 16511  
315149831 Enterococcus faecalis TX0012  
116627543 Streptococcus thermophilus LMD-9  
238924076 Eubacterium rectale ATCC 33656  
218563120 Campylobacter jejuni NCTC 11168  
291276264 Helicobacter mustelae 12198  
325677757 Ruminoecoccus albus 8  
296446028 Methylosinus trichosporium OB3b  
34557789 Wolinella succinogenes DSM 1740  
222109284 Acidovorax ebrens TPSY  
336393380 Lactobacillus coryniformis KCTC 3535  
218767587 Neisseria meningitidis Z2491  
15602991 Pasteurella multocida Pm70  
310780383 Ilyobacter polytropus DSM 2926  
312879014 Aminomonas paucivorans DSM 12260  
403744859 Alicyclobacillus hesperidum URH17-3-68  
421874296 Brevibacillus laterosporus GI-9  
220930481 Clostridium cellulolyticum H10  
225377803 Roseburia inulinivorans DSM 16841  
315659847 Staphylococcus lugdunensis M23590  
160915783 Eubacterium dolichum DSM 3991  
323463802 Staphylococcus pseudintermedius ED99  
389815358 Planococcus antarcticus DSM 14505  
328956316 Coriobacterium glomerans PW2  
422884107 Streptococcus sanguinis SK49  
116628212 Streptococcus thermophilus LMD-9  
24379808 Streptococcus mutans UR159  
13622194 Streptococcus pyogenes SP370  
227824982 Acidaminococcus sp. D21  
169823756 Finegoldia magna ATCC 29328  
320528779 Solobacterium moorei F0204  
303229394 Veillonella atypica ACS-134-V-Col7a  
304438953 Peptoniphilus duerdenii ATCC BAA-1640  
374307737 Fliifactor aloicis ATCC 35896  
256845020 Fusobacterium sp. 3 1 36A2  
306821690 Eubacterium yurii ATCC 43715  
42525844 Treponema denticola ATCC 35405  
291520706 Coprococcus catus GD-7  
285809198 Lactobacillus rhamnosus GG  
336394883 Lactobacillus farciminius KCTC 3681  
339625080 Fructobacillus fructosus KCTC 3544  
310286727 Bifidobacterium bifidum S17  
366983954 Oenococcus oeni DSM 17330

informative positions

S-----KTLAKLPLIEDVLAAGEIQPPAFPEDAQ---PVAIPLPVLGDAGHRSS-----  
RLEKTVKHKLNKRVYSYQRIIRLECYKLVKHFVAKR---YSPFMMW-----  
ELEKTVKHKPLKGVTRRIRLREYAKI IKHLVGVVE---YSLPVMV-----  
RKQDEIVHPFLNKRIPGLVHFVQAMLMARLKGDLDD---GYP-PPVVK-----  
PL-----PYHKRRISLESI IQRVQVYHLVAVFSGEK---YKGYLFWK-----  
TMST--KINYSQKQCKLENALQRVQVYLKAGAVBEGR---YRGIRFKW-----  
TMAN--AVSWGQKSVRLLENALQRAYRLAGTVVDGKR---YKSIKFRW-----  
TIARKY--LYNGKRLKLEHI IQRVYLSGGFPAGEBN---YKPIYFKW-----  
TMNK--KHLNKNRNLGQVMQRYVRLVGFAPQQR---YKSIYFKW-----  
SV-----MYRDKQLPKAAVEAVCSFRKAVLAGQS---EYEPWLMATTIKWAG---  
TV-----CLNGQDFRPLPAIRKTVASVYLRILEAGG---GRRRKLPEPCF---  
EV-----VFEEQVDFSYALRVLVLSLPSLFRNRD---AIQFPKYRYAVAV---  
NL-----YFEDGAPNLTAGIQKYQSYIAFLEREN---RIIFPAILK-----  
KV-----IYKGYFYVNDFFDQIADNLVNRKSWVWV---ELWD-----  
HI-----EYNGKRLKLEHI IQRVYLSGGFPAGEBN---YKPIYFKW-----  
KI-----LHAKNSVSNVEYICKLEBNFVSNVYK---YKSIYFKW-----  
KI-----AIKNTKLSVNEYIDKIVKSVINNNLICED---FIIKWS-----  
FI-----FPNGKN--LNQVIDMLKAI INNKINERD---FNIDWS-----  
QF-----DASGATVG--TAVERFAQQQVGRVVEGIR---SLRPAMPALSHA---  
Q-----FNGSLGTPSSSLNDFAQQFGLYCEKGDID---RLQVEYVVGES---  
-----RFDGQGHGIPVAEALAQSFGRVVEGGDID---RLCVLAWQSPSSVAVED---  
-----AVVGRSIFLQRMSSQYSYLWNLNLDGKT---TMPMPQLPELEIAMVBSBC---  
DP-----YFNVRPLPSVGLTMMVAQVYVYAKR---KISLPLLK-----  
DT-----YFENTRPLMVLGSLQTLARCFSGEQK---KMVYEPFK-----  
DV-----KIDQVRPLLVAVKSTVSSLKYCTYGEKR---QISYPKML-----  
DV-----FIEQKRLPMIAVORTSSLAKCFSGNQK---KIIYVPFRL-----  
DV-----EIEGQRPLMLAATQATSLRRCFTGEAR---RLAYPLLSCEPSA---  
DV-----YIGGRSPLMIAAGLTASLAKCYNGEAR---EISYPSFL-----  
EV-----GIQGRSPLMVAVAGTASLRCFNGELR---KIIYPSFL-----  
EV-----KIQGRSPLMIAVAGTASLRCFNGELR---RIVYPSFL-----  
EV-----IIGGRSPLMVAVAGTASLRCFNGELR---RISYPSFL-----  
DF-----ATSDGRPLSNVLRARLAVLAQVTRERR---GLAFPETLVPPLTAEDDGSANETAHVAHVSDLV---  
TV-----LVGGRMPLLLALHSAASLRCALTGGEA---ALALPEGMPLAPDLLNDGEG---  
DL-----PLGDSLTPVSVVALGLAI SLGQSFESGTL---DLALPAPPDALTLAGLGA---  
DM-----LTAQQTTPIGTVLIRLAGSLAQVVEGKG---DLDLPLALDRPAMPLEWPAAPPAGGETGC---  
DM-----GTSVQVTPVPMQVRLCSLAQVLYGERT---KLELQGLPLALSSSESD---  
DM-----PSPQITPVMQVRLCSLAQVLYGERK---ELEDLPLCTPDLAAMPVPLA---  
EYL-----YDAGRSTLRTVATRYIQGFKAVRSRKI---ENLHFFITDFGALRECF---  
KI-----KVNKLIYMQAMSEYVAAFVAMETGDF---ENVQKILHVNMLEGK---  
KI-----KYGKETCSVTVAMDKYVKGFKYIKSEKDS---SKFPCPVSSLEWRK---  
KI-----MYREKMYMCMNIENYIQOYASLIMKRTD---NIVFPDYNLIGEEYG---  
PI-----NFDGQNYPLNRAIMHYVANFNKALLYEDE---LKIYFDD-----  
KV-----LLQGRSPLMVAVAGTASLRCFNGELR---KLELQGLPLALSSSESD---  
KI-----KMGKKTTRVRYADKYISLSLSAIEKNDP---GLLQPLTIQIDEMFEDDEDG---  
NA-----RVGKEIVSLVASEKAEGLVQAMSGSA---AILKLPFFVTPKSSP---  
SC-----IMTERYETLLSATQIIRLSLVSAGQKES---RRLI-LPVMGEDDVQGEVYEAADGV---  
DV-----AMPGRQMSVLASIEQAASLRLVYDGGSE---QVLELPLRIGLRQVFEI---  
EV-----RIDGEPHLSNAVHKLVSSTYTCRNNNSA---AGLKLPELIPVLAHEYE---  
QT-----SIEQGHSTLAAIDKMSQFAGVTDKNA---KQLKLPPELPLKYEQYE---  
QM-----SFQETFSVLAARIDRVGFSQALITPNA---NLLKLPPELPLKHEQYE---  
DV-----KLTRKYSVNI SIDEVIKRYTKICRGGG---NLLPSIPIQEHRYV---  
RM-----EIQGRHTLIRGTALCAEFGAAACREKNP---DLLALPALISPDG---  
MV-----WLENERYDLTASIEAMVSSFNASTEDP---SALQPLRTEVQMGVYE---  
QV-----ELEGRYSNRAIEEMKSYVTACTRSMY---ERLRTPLTLLKLIHSYE---  
EC-----VFBGKI I IRSIAIEKVISFSSSCKANDY---SLLKLPPIPLVPHANE---  
DM-----SVKDMRIVSNIDMLIASYSSALQGNRT---ELEDLPELQVPHSYE---  
RI-----EIDKMGITIRAEIMIQSIIYFKNGHL---DIVKFNLRKQVYFEL---  
KI-----EIDKGLQVFNANVEVSEILKVIETGKI---TDFKPSPHVDVYDL---  
KL-----KIDNKYFVFNAVEIYVDSLKFKVLSNGNR---EVKIPWTYV---  
KV-----QIRNSKQFLQAAVQVYLDLQVYLDGKH---EKLLFPILDFPKAR---  
CI-----AYRDGYKTSVVISLVQDCLNANLKRKA---IDELDPPDIV---  
TF-----HYNGKIDMYLSNIVSDYTKVVIQALNQPEK---GVPEFRI---  
TV-----LYNGKEMVLSNIVSDYTKVVIQALNQPEK---EIPFRI---  
TY-----LYNGKEMVLSNIVSDYTKVVIQALNQPEK---GVPEFRI---  
TF-----SYNGKEMVLSNIVSDYTKVVIQALNQPEK---GVPEFRI---  
IL-----YIDSRQFLANAIYANSIQALKEKCDT---SKIKIYEI---  
EV-----FIGKTRYTLNANVEYCKSVFLALEKGE---QLKFDYEL---  
KV-----SIMGREYMLNAIEIYVKSILDAISSENP---SLIKFVVEYFCTYESDVL---  
DV-----KINDTIQTFSAARVYICKSVFDALVQAAA---NEIRFIEYEL---  
FV-----TIDNKYCRINQALMIEYIRSVFDALNNDI---SLLRFPYSEL---  
EV-----RIDKSVYVNNAKIKKISFEALHYETD---SYLKFYVTEL---  
KF-----RINNHNHYSIDIKIYKISFDALSANDL---SLVRFPEDEL---  
SV-----IINGRTEVLTNAVKIYCKSIFDALQKDI---SLIRFYNEF---  
KV-----LNNKHYLNKAIIFVHSIFDALNEKDI---SQINRYNEL---  
EV-----RIDGKQVYVNNAKIKKISFEALSDSDS---ALIRFYKIEL---  
EI-----TFNGKALLQNAVADHVENCLAPLDGKAKVCRIVKFPDVEVSHANDHV---  
EI-----SYGSKFTLKNALSQYIRCCSYLDSNQE---VELKQVGFDEE---  
EI-----TMSKRELVQVQVYKQVCKYKLSGSDI---ELRMEFEL---  
D-----VDELGTITITQISVFRDALRVLSEGEK---LPELGVRCQTELCF---  
EV-----GYLQQTAVNSAIEYVRNADLVLCGRP---EVAVSVAI---

\* \*\*\*\*\*

# Cas1

# Cas9

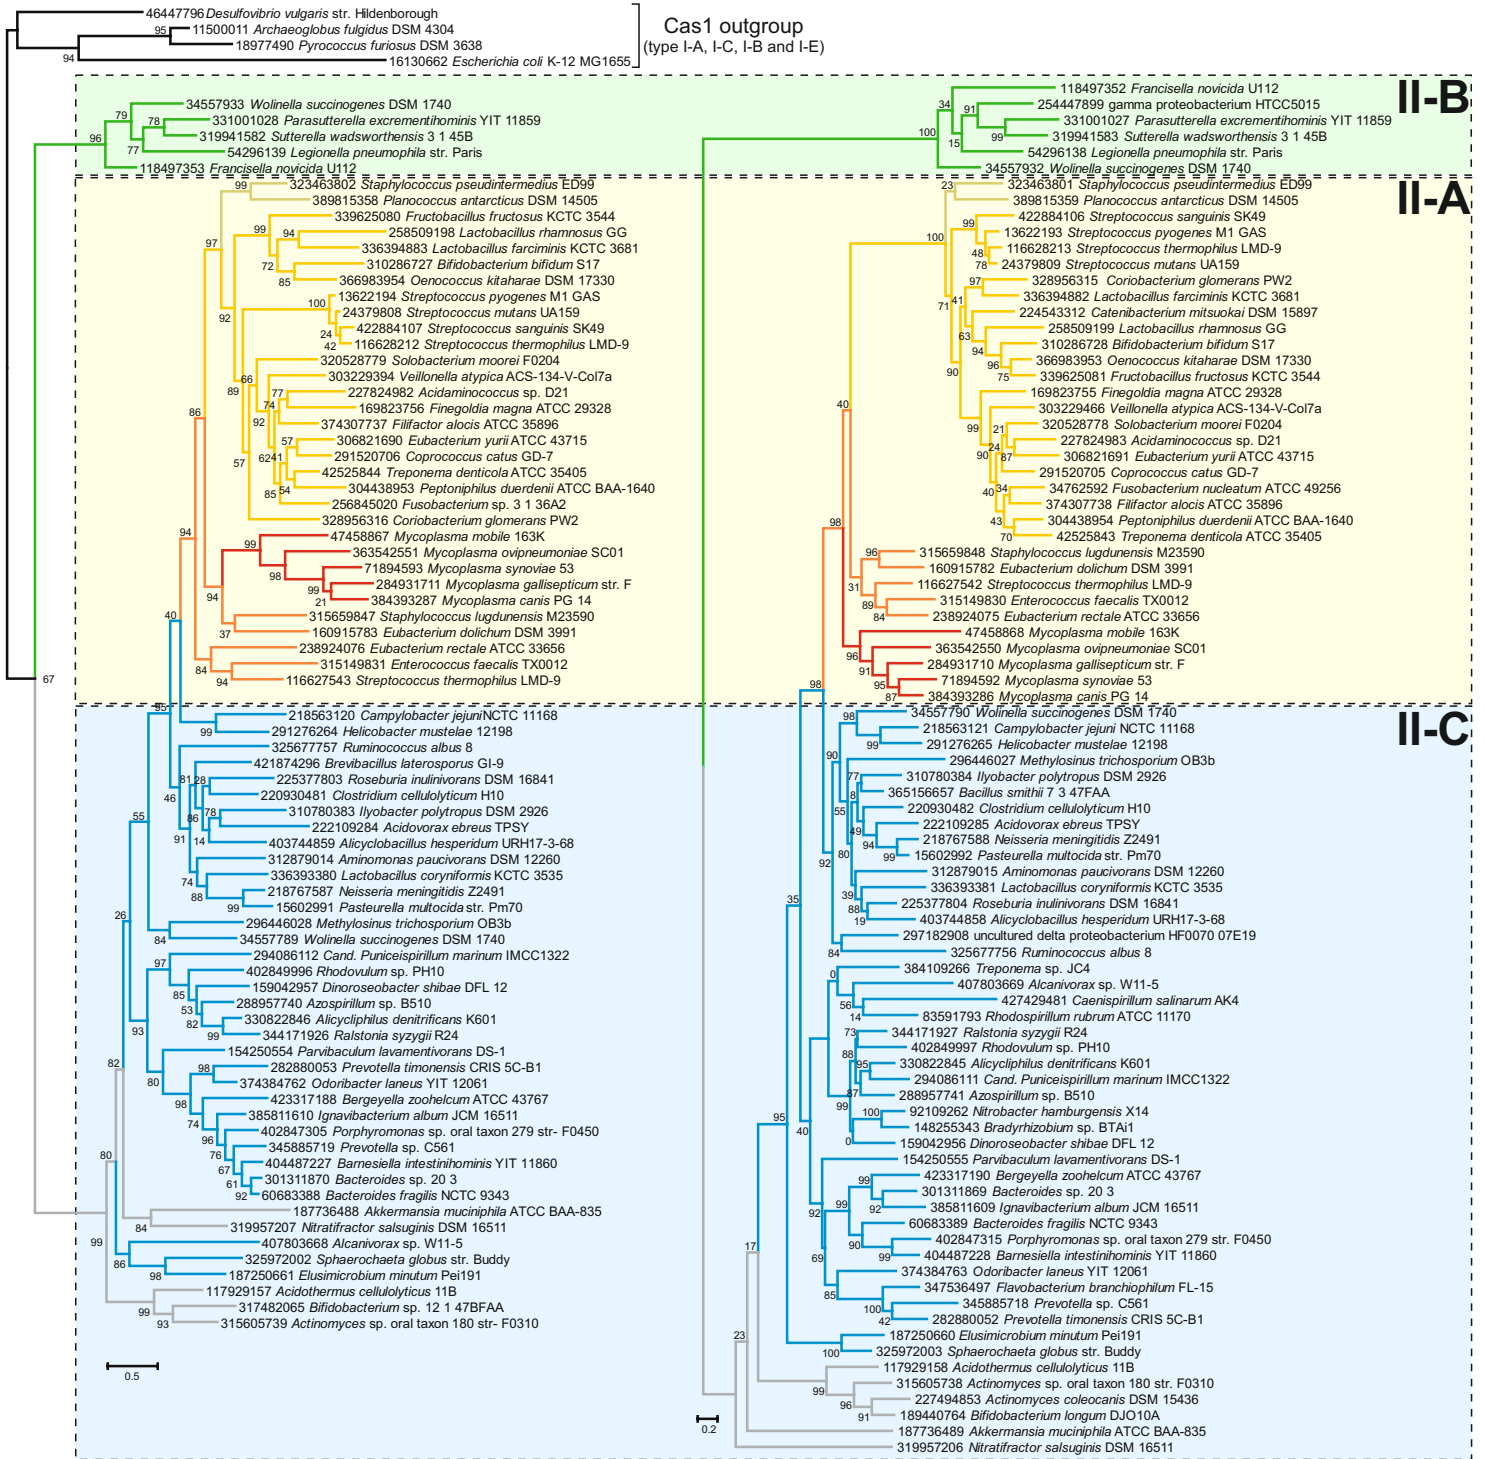

**Supplementary Figure S4. Phylogenetic analysis of representative Cas9 and Cas1 sequences.** Phylogenetic trees of Cas1 (left) and Cas9 (right) reconstructed from selected, informative positions of Cas1 and Cas9 multiple sequence alignments are shown (see Figure 1 and Supplementary Figures S2 and S3). The Cas1 tree is rooted to the outgroup of selected Cas1 orthologs of type I CRISPR-Cas systems. The Cas1 and Cas9 orthologs of the types classified as II-A, II-B and II-C are highlighted with shaded boxes. The same branch colors were used for each bacterial strain on both trees. Each protein is represented by the GenInfo (GI) identifier followed by the bacterial strain name. The bootstrap values are given for each node (see Materials and Methods). The scale bars for the branch length are given as the estimated number of amino acid substitution per site. Note the similarity of the trees topology and monophyletic clusters of subtypes II-A and II-B on both trees supported by high bootstrap values.



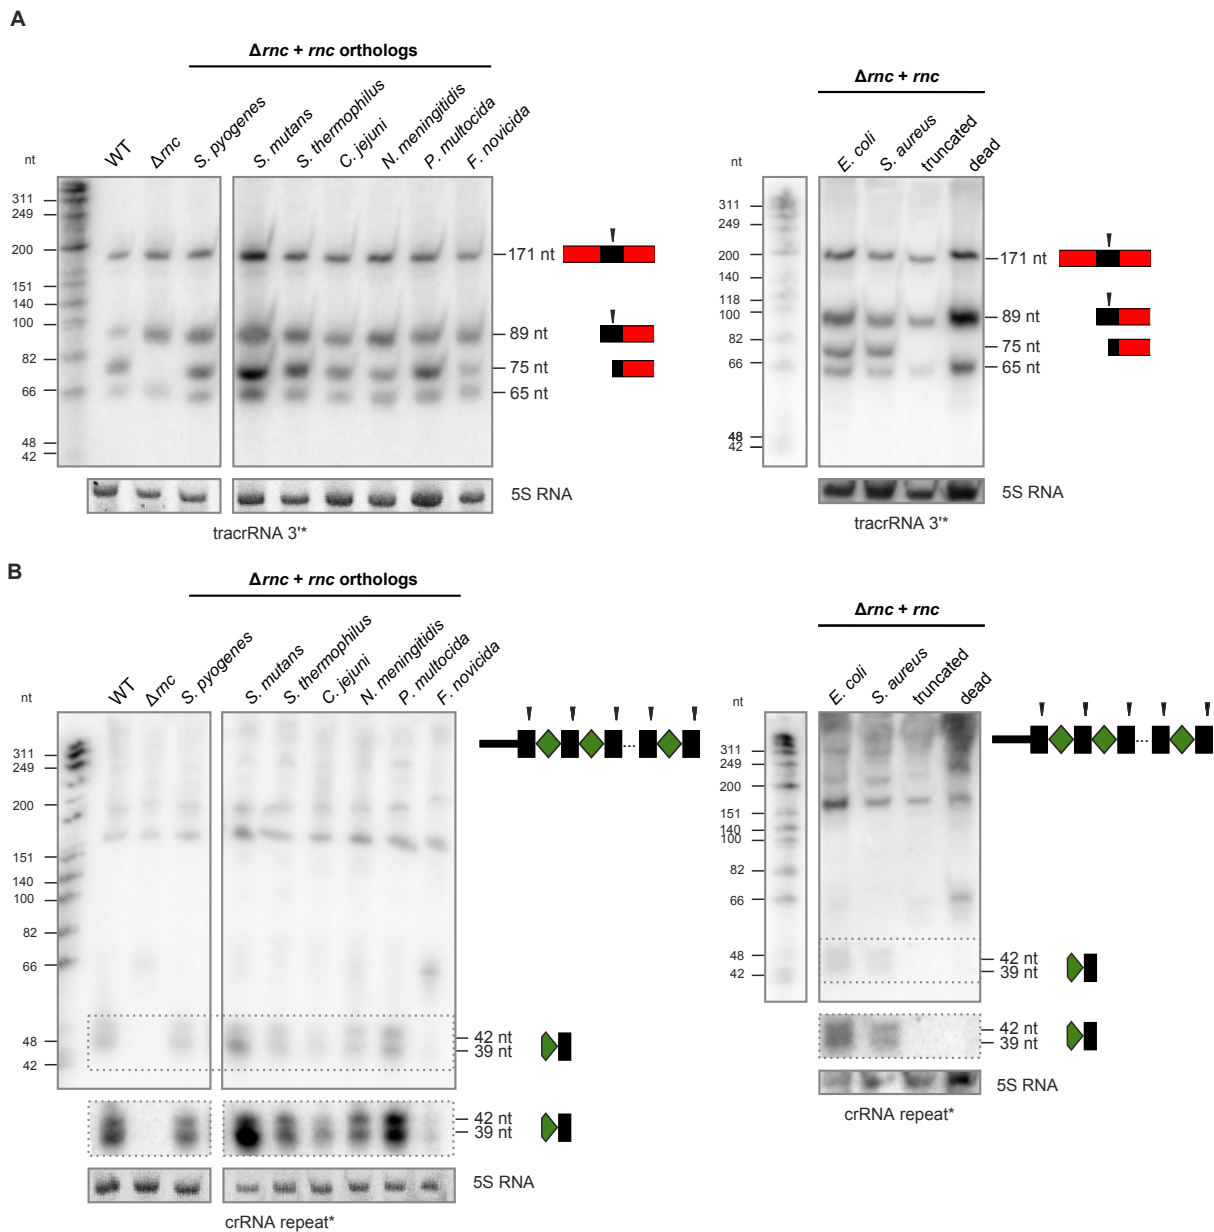

**Supplementary Figure S5. RNase III is a general executioner of tracrRNA:pre-crRNA processing in type II CRISPR-Cas.** Northern blot analysis of total RNA from *S. pyogenes* WT,  $\Delta rnc$  and  $\Delta rnc$  complemented with *rnc* orthologs or *rnc* mutants probed with (A) tracrRNA and (B) crRNA repeat (Supplementary Table S1). The dashed-line boxes represented below the Northern blots in (B) show the area of the blots with enhanced exposure. All RNase III orthologs can co-process *S. pyogenes* tracrRNA and pre-crRNA. No mature forms of tracrRNA and crRNAs could be observed in  $\Delta rnc$  complemented with the truncated version or catalytically inactive (dead) mutant of RNase III.

```

*
15674631 Streptococcus pyogenes SF370 -----MKQLEELLSTSF-----DIQFNDLTLLETAFTHTSYANEHRLLNVSHNERLEPLGDAVLQLIISEYLFAPKPKTEGDMSKLRSMIVREESLAGFSRFCSDAYIKLGKGEKSGGRRRDTILGDLFEAFGLALLDQGLDAVR
24379904 Streptococcus mutans UA159 -----MKTLEKKLAEDF-----KIVFSDKELLETAFTHTSYANEHRLLNISHNERLEPLGDAVLQTIISHYLPDKYQKAEGLSKMRSMIVREESLAGFSRNCHFDRIYIKLGKGEKSGGRRDITILGDLFEAFGLALLDAGLKAVE
116628032 Streptococcus thermophilus LMD-9 -----MNLEQKLEQDF-----GIVFSDKLELLETAFTHTSYANEHRLLNISHNERLEPLGDAALQLVIVSVLYNRYPNKPEGEMSKMRSTIVREESLAGFTKACGFEQYIRLKGKGEKSGGRRERATILGDLWEAFGLALYLDQGLPAVE
57651802 Staphylococcus aureus COL -MSKQKKSEIVNRFKRFPDKMTELGFYQNIIDLYQQAFSHSSFINDFNMNRDLHNERLEPLGDAVLELTVSRVLPDKHPNLPENLTKMRATIVCEPSLVI FANKIGLNEMILLGKGEKSGGRRTRPRLISDAFEAFIGALYLDQGLDIWV
118498035 Francisella novicida U112 -----MVPEYSRFFYNIL-----GYNFKDYTLIRALTHRSTTK-----NYERLEPLGDSVLSFVIAEVLVYKQFTDLAEGKLSQLRSLKLVGTTLAQLASSLKMDEYIILGASEQ--GGHKREKILEDVFEAVIGAIYLDSDPATVK
218767809 Neisseria meningitidis Z2491 MKDDVLKQQAHAAIQKKL-----GYAFRDISLLRQALTHRSHAK-----HNERFEPVGD SILNYTVARMLPDAFPKLTTEGELSRLRASLVNEGVLAEMAEMNVGDGLYL GAGELKSGGFRPRLADAMEAMFAVVSFDADFNAT
15601926 Pasteurella multocida Pm70 -----MTQNLERLQRQI-----GYQFNQFALLKQALTHRSAVK-----HNERLEPLGDAILNFIIEAALYHQFPKCNEGELSRMRATLVREPTLASLARQFELG DYLSLGPGEKSGGFRRESILADCV EAIIGAI SLDSDLATTT
218563224 Campylobacter jejuni NCTC 11168 -----MKNIEKLEQSL-----TYEFKDKNLLIHALTHKSPKKS-----NNERLEPLGDAVLDLVVGEYLFHKFAKDAEGDLSKLRALVNEKSFAKIANSNLNGDFILMSVAEENNGGKPKSILSDAEAIIGAIHLEAGFEFAK
16130492 Escherichia coli K-12 -----MNPIVINRLEQRKL-----GYTFNHQELLQALTHRSAVK-----HNERLEPLGDSILSYVIANALYHRPPRVDEGDMSTRMATLVRGNTLAE LAREFELGECLELRGPGEKSGGFRRESILADTVEALIGGVFLDSDIQTVE

```

Motifs [ \_\_\_\_\_ Cutting domain \_\_\_\_\_ ]

```

↓
15674631 Streptococcus pyogenes SF370 RFLKQVMIPQVEKGNFE--RVKDYKTCLEFLQTKGDAIDYQVISEKGAHAKQFEVSI VVNG-AVLSKGLGKSKKLAEQDAAKNALAQ LSEV-----
24379904 Streptococcus mutans UA159 AFLNQVVI PKVENNNYE--RVTDYKTALQELLQVDGDLIDYEVLKE SGPAAKCFEVAVSMNH-EKLSSTGKSKKLAEQEAAKNAL EKLQGRS-----
116628032 Streptococcus thermophilus LMD-9 KFLNQVMIPQVEKGNFD--RVIDYKTALQERLQVNGKVDITYTVIDESGPAHAKFEFTMQVAVDG-KELSTGFGKSKKLAEQAAKSALEQLGN-----
57651802 Staphylococcus aureus COL KFAEKVIFPHVEQNELL--GVVDFKTFQFQYVHQNKQNGDVTYNIKEEGPAHHR LFTSEVILQG-EAIAEGKGTKKESQRAAESAYKQLKQIK-----
118498035 Francisella novicida U112 KVILKWPQI IISSINLDTIKVKDSKSKLQEI LLQNALSLPEYSIETIDGKDHEQQFTVAMSKDLNLRVKAQGT SRKKAQEQA AEKMIEMLSQQGLHEKK--
218767809 Neisseria meningitidis Z2491 KVVRLHFAERVRRVDFQN-QAKDGKTALQEALQARRPALPKYRIEEQIGHANDS MFVISC DLGELGPFVCRAGT SRKKAQEQA AEKAEKALWLEEKLP LK KKKK
15601926 Pasteurella multocida Pm70 KIVQHWYQAQLKIQPGD-NQKDKPTRLQEYLQGRRLPLPTYNVVEIKGEAHCQTF TVECYVKNIDRTFMGSGASRRKAEQA AAEKILQLLEMK-----
218563224 Campylobacter jejuni NCTC 11168 TIALRLIEKNFPQIDAKI-LIKDYKTKLQEIITQGGIGQTPQYETVRAF GPDLKQFBIALMLDG-KELARAIAGSKKEAQQMAAKIALEKLGAL-----
16130492 Escherichia coli K-12 KLILNWPQTRLDEISPGD-KQKDKPTRLQEYLQGRHLPLPTYL VVQVGEAHDQEFTHCQVSGLS EFPVVTGSSRRKAEQA AAEQALKKLELE-----

```

Motifs [ \_\_\_\_\_ dsRNA binding domain \_\_\_\_\_ ]

**Supplementary Figure S6. Multiple sequence alignment of bacterial endoribonucleases III used in the study.** Domains indicated below the alignment are according to the domains identified in RNase III from *E. coli* (58, 59). The conserved catalytic aspartate residue mutated in the catalytically inactive “*mc dead*” mutant and the last amino acid of the truncated *mc* mutant are indicated above the alignment with an asterisk and an arrow, respectively.

**A**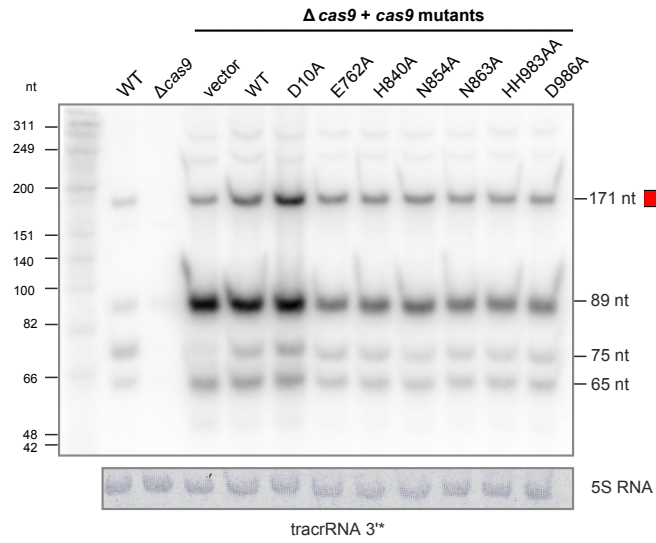**B**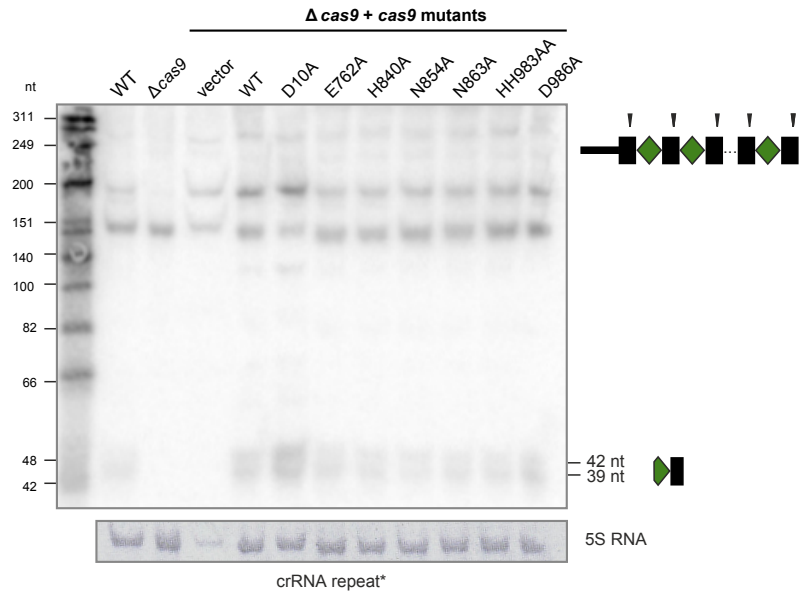

**Supplementary Figure S7. Conserved catalytic amino acid residues of Cas9 are not involved in dual-RNA processing by RNase III.** Northern blot analysis of total RNA extracted from *S. pyogenes* WT,  $\Delta cas9$  and  $\Delta cas9$  complemented with pEC342 (backbone vector containing tracrRNA-171 nt and the native *cas* operon promoter from *S. pyogenes*) or pEC342-derived plasmids encoding Cas9 WT or mutants, hybridized with (A) tracrRNA or (B) crRNA repeat probe (Supplementary Table S1). tracrRNA:crRNA co-processing is observed in all strains encoding Cas9 point mutants. Note that in a previous study, we observed low abundance of tracrRNA in the *cas9* deletion mutant (16). For this reason, plasmids used in *cas9* complementation studies were designed to encode tracrRNA in addition to *cas9*.

**Supplementary Figure S8. Cas9 and tracrRNA:crRNA co-evolved.**

Northern blot analysis of total RNA extracted from *S. pyogenes* WT,  $\Delta cas9$  and  $\Delta cas9$  complemented with pEC342 or pEC342-derived plasmids encoding Cas9 WT or mutants, hybridized with (A) tracrRNA or (B) crRNA repeat probe (Supplementary Table S1). Only *S. pyogenes* Cas9 WT and closely related Cas9 orthologs from *S. mutans* and *S. thermophilus\** (CRISPR3) can contribute to co-processing of *S. pyogenes* tracrRNA:pre-crRNA.

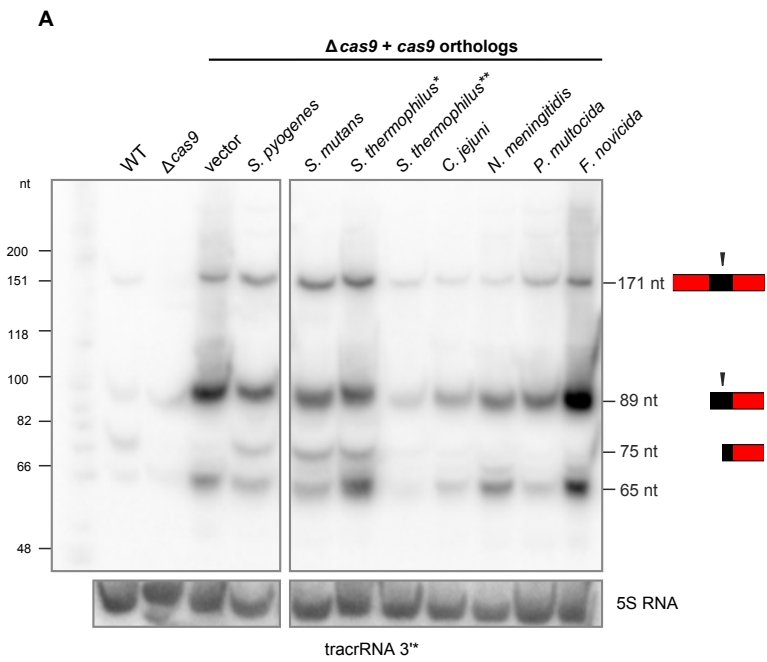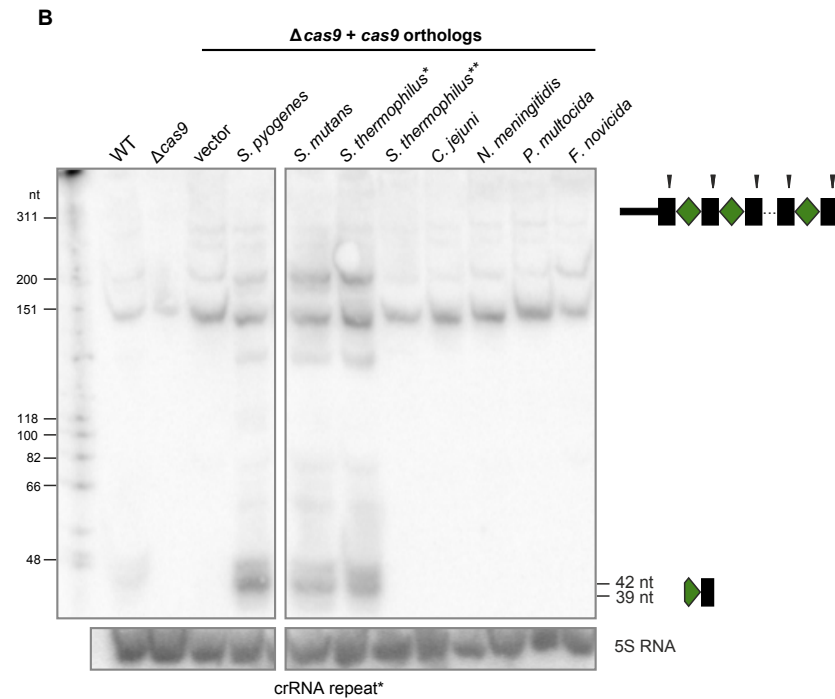

**Supplementary Table S3. Overview of type II CRISPR-Cas spacer sequences from selected bacterial strains with BLAST candidate protospacers and their downstream sequence.**

| Strain <sup>a</sup>                                        | Number of spacers | CRISPR Spacer <sup>b</sup>     | Spacer sequence                                                                                       | Blast candidate <sup>c</sup>                                                                                                                                                | % Identity <sup>d</sup>                                                                                                                                                                                                                  | 10 bp downstream protospacer <sup>e</sup> |             |
|------------------------------------------------------------|-------------------|--------------------------------|-------------------------------------------------------------------------------------------------------|-----------------------------------------------------------------------------------------------------------------------------------------------------------------------------|------------------------------------------------------------------------------------------------------------------------------------------------------------------------------------------------------------------------------------------|-------------------------------------------|-------------|
| <i>Streptococcus pyogenes</i> SF370 (Accession: NC_002737) | 1                 |                                | TGC GCTGGTTGATTTCTTCTTGC GCTTTTT                                                                      | <i>S. pyogenes</i> MGAS1882 (MGAS1882_1116), MGAS8232 (spyM18_0769), MGAS10394 (M6_Spy0995, M6_Spy1349), SSI-1 (SPs0926), ΦP9<br><b>endopeptidase gene</b>                  | 100                                                                                                                                                                                                                                      | TGGCTTTTTTC                               |             |
|                                                            |                   |                                |                                                                                                       | <i>S. pyogenes</i> MGAS2096 (MGAS2096_Spy1450), A20 (A20_1472c), M1 476 (M1GAS476_1503), MGAS9429 (MGAS9429_Spy1426), MGAS5005 (M5005_Spy1424)<br><b>endopeptidase gene</b> | 97                                                                                                                                                                                                                                       | TGGCTTTTTTC                               |             |
|                                                            |                   |                                |                                                                                                       | <i>S. pyogenes</i> M1 GAS (SPy_0700), MGAS2096 (MGAS2096_Spy0592)<br><b>endopeptidase gene</b>                                                                              | 97                                                                                                                                                                                                                                       | TTGCTTTTTTC                               |             |
|                                                            |                   |                                |                                                                                                       | <i>S. pyogenes</i> MGAS6180 (M28_Spy1234); NIH1 (NIH1.1_43), SSI-1 (SPs0647), MGAS315 (SpyM3_0930, SpyM3_1215)<br><b>phage related gene</b>                                 | 100                                                                                                                                                                                                                                      | TGACTTTTTTC                               |             |
|                                                            | 6                 | 2                              |                                                                                                       | TTATATGAACATAACTCAATTTGTA AAAAA                                                                                                                                             | <b>gene for pyrogenic exotoxin M (<i>speM</i>) of several Streptococci strains</b>                                                                                                                                                       | 100                                       | GGCTATTGGG  |
|                                                            |                   |                                |                                                                                                       |                                                                                                                                                                             | <i>S. pyogenes</i> MGAS8232 (spyM18_0742), MGAS10750 (MGAS10750_Spy0588), MGAS10270 (MGAS10270_Spy0563)<br><b>adenine specific methylase gene</b>                                                                                        | 100                                       | TGGTATGTTG  |
|                                                            |                   |                                |                                                                                                       |                                                                                                                                                                             | <i>S. pyogenes</i> Manfredo (SpyM50653)<br><b>adenine specific methylase gene</b>                                                                                                                                                        | 97                                        | TGGTATGTTG  |
|                                                            |                   |                                |                                                                                                       |                                                                                                                                                                             | <i>S. pyogenes</i> Alab49 (SPYALAB49_001176), MGAS10750 (MGAS10750_Spy1285), MGAS9429 (MGAS9429_Spy0843), MGAS10394 (M6_Spy1203), SSI-1 (SPs0763), MGAS315 (SpyM3_1101), ΦH4489A ( <i>hylP</i> )<br><b>hyaluronoglucosaminidase gene</b> | 100                                       | TGGCGCATT A |
| 4                                                          |                   | AGTGCCGAGGAAAAATTAGGTGCGCTTGCC | <i>S. pyogenes</i> MGAS8232 (spyM18_1254), NZ131 (Spy49_0785)<br><b>hyaluronoglucosaminidase gene</b> | 97                                                                                                                                                                          | TGGCGCATT A                                                                                                                                                                                                                              |                                           |             |

| Strain <sup>a</sup>                                       | Number of spacers | CRISPR Spacer <sup>b</sup> | Spacer sequence                 | Blast candidate <sup>c</sup>                                                                                                                                                                                                                                             | % Identity <sup>d</sup> | 10 bp downstream protospacer <sup>e</sup> |
|-----------------------------------------------------------|-------------------|----------------------------|---------------------------------|--------------------------------------------------------------------------------------------------------------------------------------------------------------------------------------------------------------------------------------------------------------------------|-------------------------|-------------------------------------------|
|                                                           |                   | 5                          | TAAATTTGTTTTAGCAGGTAAACCGTGCTTT | <i>S. pyogenes</i> MGAS10750 (MGAS10750_Spy0839), MGAS10270 (MGAS10270_Spy0546, MGAS10270_Spy0804), SSI-1 (SPs0517, SPs0888), MGAS1882 (MGAS1882_1156), MGAS8232, NZ131(Spy49_1511c), MGAS315 (SpyM3_0965, SpyM3_1347)<br><b>phage protein gene or intergenic region</b> | 100                     | TGGTTATAATC                               |
| <i>Streptococcus mutans</i> UA159 (Accession: NC_004350)  | 5                 | 3                          | CTAACTATGATGACACAACAGCTTTTAGCG  | ΦM102 (orf13)<br><b>putative tail protein gene</b>                                                                                                                                                                                                                       | 100                     | TTGAAATTC                                 |
| <i>Streptococcus mutans</i> LJ23 (Accession: NC_017768)   | 8                 | 2                          | TGAAGTGCAAGCTTACGTGACTGACTCGCG  | ΦM102 (orf15)<br><b>putative minor structural protein</b>                                                                                                                                                                                                                | 90                      | AGGTATGCAG                                |
| <i>Streptococcus mutans</i> GS-5 (Accession: NC_018089)   | 21                | 3                          | TAATAGCAATCGTGACGGACGTATTGATTT  | ΦM102 (orf15)<br><b>putative minor structural protein</b>                                                                                                                                                                                                                | 97                      | AGGTGAAATT                                |
|                                                           |                   | 5                          | GTTGAGTGCAACAGCTAGCTAATAGCTTTT  | ΦM102                                                                                                                                                                                                                                                                    | 100                     | AGGCTGGCAC                                |
|                                                           |                   | 16                         | AGGCATTTTCTGATTGAGATTTTCGATATT  | ΦM102 (orf3)<br><b>putative large terminase gene</b>                                                                                                                                                                                                                     | 93                      | TGGAAAGATG                                |
|                                                           |                   | 18                         | TATAGCTAATATGTGTATACTGACAGCGCA  | ΦM102 (orf7)<br><b>putative DNA packaging protein gene</b>                                                                                                                                                                                                               | 100                     | AGAAAGATTG                                |
| <i>Streptococcus mutans</i> NN2025 (Accession: NC_013928) | 69                | 2                          | GATTGTGCCCGCTAGTAAACCGCCTCGCGC  | ΦM102 (orf20)<br><b>putative endolysin gene</b>                                                                                                                                                                                                                          | 93                      | TGCAGATTTG                                |
|                                                           |                   | 6                          | GATTGTATCAGTAATCGAACTTCTGCTTAT  | ΦM102 (orf38, orf39)<br><b>hypothetical protein gene</b>                                                                                                                                                                                                                 | 93                      | GGGATTTGAC                                |
|                                                           |                   | 8                          | TGGTCCAAAGTGCAGAGCCAAAGAAAAACA  | ΦM102 (orf11)<br><b>putative major tail protein gene</b>                                                                                                                                                                                                                 | 97                      | AACCGGTCTT                                |
|                                                           |                   | 9                          | ATTGTCAATCGCCGTTCTGCGCTTGCACG   | ΦM102 (orf17)<br><b>hypothetical protein gene</b>                                                                                                                                                                                                                        | 90                      | CGGTTTTGAA                                |
|                                                           |                   | 17                         | GCTTGAATATAATTGTGTATCCGCAATGA   | ΦM102 (orf21)<br><b>putative replisome organizer gene</b>                                                                                                                                                                                                                | 93                      | CGAATTACGA                                |

| Strain <sup>a</sup>                                                        | Number of spacers | CRISPR Spacer <sup>b</sup> | Spacer sequence                | Blast candidate <sup>c</sup>                                                       | % Identity <sup>d</sup> | 10 bp downstream protospacer <sup>e</sup> |
|----------------------------------------------------------------------------|-------------------|----------------------------|--------------------------------|------------------------------------------------------------------------------------|-------------------------|-------------------------------------------|
|                                                                            |                   | 23                         | AAAAAGAAACGCCTTTTGATTGACCAATC  | ΦM102 (orf14)<br><b>putative receptor-binding protein gene</b>                     | 90                      | AAGCAAGA                                  |
|                                                                            |                   | 29                         | AGTTATTAATATCTATGACAGTCTCAAAGA | ΦM102 (orf14)<br><b>putative receptor-binding protein gene</b>                     | 93                      | GGCTACAGA                                 |
|                                                                            |                   | 37                         | TTCTGGCTGTCTTTCAGAGTGATAAGCGCA | ΦM102 (orf2)<br><b>putative small terminase gene</b>                               | 100                     | GGATTTTCA                                 |
|                                                                            |                   | 40                         | TGCAAGTTATCTTGCTATGTGGACGAATTG | ΦM102 (orf9)<br><b>hypothetical protein gene</b>                                   | 93                      | GGAAACAATC                                |
|                                                                            |                   | 43                         | GCAATTTAGTTTTATTCCGTGGGAGCAGCA | ΦM102 (orf3)<br><b>putative large terminase gene</b>                               | 93                      | AGGCTCCATT                                |
|                                                                            |                   | 48                         | AGAGTATAGCCAGTGTTCACAGGCTTTTA  | ΦM102 (orf12)<br><b>putative tape measure protein gene</b>                         | 93                      | GTGGTGACAA                                |
|                                                                            |                   | 49                         | CGCAACAATGACTATTAATATCAACGGTGG | ΦM102 (orf15)<br><b>putative minor structural protein gene</b>                     | 93                      | CGGAGCAAT                                 |
|                                                                            |                   | 56                         | AATCGCTTCTTTGCTAACCACAATTTGTGC | ΦM102 (orf26)<br><b>putative RecT family single-strand annealing protein gene</b>  | 93                      | AGGCGCAGAG                                |
|                                                                            |                   | 60                         | AAATGCTCTTGAAGAACCTGATAGATGACA | ΦM102 (orf3)<br><b>putative large terminase gene</b>                               | 93                      | GAGACGAAAA                                |
|                                                                            |                   | 66                         | TGCAAAAGATGGCCTCGAGCAATTATCGCA | ΦM102 (orf33)<br><b>hypothetical protein gene</b>                                  | 100                     | TGGATTAAGC                                |
| <i>Streptococcus thermophilus</i> LMD-9 CASS4 locus (Accession: NC_008532) | 8                 | 2                          | TCAATGAGTGGTATCCAAGACGAAACTTA  | <i>Streptococcus thermophilus</i> plasmid pSt106<br><b>putative resolvase gene</b> | 100                     | TGGCAAGTT                                 |
|                                                                            |                   | 3                          | CCTTGTCGTGGCTCTCCATACGCCATATA  | <i>Streptococcus thermophilus</i> plasmid pND103                                   | 100                     | AGGGCGGGT                                 |
|                                                                            |                   | 4                          | TGTTTGGGAAACCGCAGTAGCCATGATTAA | Φ7201 (orf33)                                                                      | 100                     | AGGTCTCGCT                                |

| Strain <sup>a</sup>                                                         | Number of spacers | CRISPR Spacer <sup>b</sup> | Spacer sequence                  | Blast candidate <sup>c</sup>                                                       | % Identity <sup>d</sup>                                                                                                              | 10 bp downstream protospacer <sup>e</sup> |               |
|-----------------------------------------------------------------------------|-------------------|----------------------------|----------------------------------|------------------------------------------------------------------------------------|--------------------------------------------------------------------------------------------------------------------------------------|-------------------------------------------|---------------|
| <i>Streptococcus thermophilus</i> LMD-9 CASS4a locus (Accession: NC_008532) | 5                 |                            | ACAGAGTACAATATTGTCCTCATTGGAGACAC | Φ TP-J34 (orf11)<br><b>hypothetical protein gene</b>                               | 94                                                                                                                                   | TGGGCTAGGA                                |               |
|                                                                             |                   |                            |                                  | ΦSfi19 (orf1626)<br><b>minor tail protein gene</b>                                 | 100                                                                                                                                  | TGGTGCTAAT                                |               |
|                                                                             | 6                 |                            | CTCATATTCGTTAGTTGCTTTTGCATAAA    | ΦYMC 2011 (Ssal_phage00063)<br><b>putative minor tail protein gene</b>             | 90                                                                                                                                   | GGGTGCTAAC                                |               |
|                                                                             |                   |                            |                                  | Φ7201 (orf33)                                                                      | 90                                                                                                                                   | TGGTGCTAGA                                |               |
|                                                                             | 2                 |                            | CTTCACCTCAAATCTTAGAGCTGGACTAAA   | Φ7201 (orf39)                                                                      | 100                                                                                                                                  | GTAGAAATAGA                               |               |
|                                                                             | 3                 |                            | ATGTCTGAAAATAACCGACCATCATTACT    | Φ TP-J34 (orf49), ΦSfi11 (orf669)<br><b>putative minor structural protein gene</b> | 93                                                                                                                                   | CCAGAAATGTC                               |               |
|                                                                             | 4                 |                            | GAAGCTCATCATGTTAAGGCTAAAACCTAT   | ΦALQ13.2 (orf35)<br><b>helicase gene</b>                                           | 90                                                                                                                                   | CTAAAAATTA                                |               |
|                                                                             | 16                |                            |                                  |                                                                                    | ΦSfi11 (orf443), ΦSfi18 (orf443), ΦSfi21 (orf443), ΦSfi19 (orf443), ΦO1205 (orf10)<br><b>putative helicase gene</b>                  | 90                                        | CTCAAAATTA    |
|                                                                             |                   |                            |                                  |                                                                                    | Φ1033, Φ 1042<br><b>nonfunctional host specificity protein gene</b>                                                                  | 97                                        | ATAAAATTCATCA |
|                                                                             |                   |                            |                                  |                                                                                    | ΦDT1.1 (orf18), ΦDT1.2 (orf18), ΦDT1.3 (orf18), ΦDT1.4 (orf18), ΦDT1.5 (orf18), ΦMD4 (orf18)<br><b>host specificity protein gene</b> | 93                                        | ATAAAATTCATCA |
|                                                                             |                   |                            |                                  |                                                                                    | pSt08 plasmid                                                                                                                        | 97                                        | CCGAAAAATA    |
|                                                                             |                   |                            |                                  |                                                                                    | ΦALQ13.2 (orf25), Φ858 (orf30), ΦST3 (orf253)<br><b>endonuclease gene</b>                                                            | 90                                        | TGAAAAATTA    |
|                                                                             | 7                 |                            |                                  |                                                                                    | ΦJ1 (orf253), ΦS3b (orf253)<br><b>endonuclease gene</b>                                                                              | 90                                        | TGAAAGATTA    |
| 13                                                                          |                   |                            |                                  |                                                                                    |                                                                                                                                      | AACTACCAAGCAAATCAGCAATCAATAAGT            | ΦSfi11        |



| Strain <sup>a</sup>                                                                                             | Number of spacers | CRISPR Spacer <sup>b</sup> | Spacer sequence                | Blast candidate <sup>c</sup>                                                                               | % Identity <sup>d</sup> | 10 bp downstream protospacer <sup>e</sup> |
|-----------------------------------------------------------------------------------------------------------------|-------------------|----------------------------|--------------------------------|------------------------------------------------------------------------------------------------------------|-------------------------|-------------------------------------------|
|                                                                                                                 |                   |                            |                                | ΦYMC-2011 (Ssal_phage00051)<br><b>predicted clp-protease gene</b>                                          | 93                      | TTAAGAACAT                                |
|                                                                                                                 |                   |                            |                                | ΦSfi21 (orf221)<br><b>clp-protease gene</b>                                                                | 90                      | TCAAAGAATAT                               |
|                                                                                                                 |                   |                            |                                | Φ858 (orf22)                                                                                               | 93                      | AAAAAAACT                                 |
|                                                                                                                 |                   | 16                         | AACAGTTACTATTAATCACGATTCCAACGG | Φ2972 (orf21)<br><b>structural protein gene</b>                                                            | 93                      | AAAAAAACT                                 |
|                                                                                                                 |                   |                            |                                | ΦAbc2 (orf17)<br><b>tail protein gene</b>                                                                  | 93                      | TAAAAAGACT                                |
| <i>Campylobacter jejuni</i> subsp. <i>jejuni</i> NCTC 11168 (Accession: NC_002163)                              | 5                 | 1-5                        |                                | no significant BLAST hits                                                                                  |                         |                                           |
| <i>Campylobacter jejuni</i> subsp. <i>jejuni</i> CF93-6 (Accession: AANJ00000000)                               | 5                 | 3                          | TCATCATCACTTAAACCTTAAATTTACC   | <i>C. jejuni</i> RM1221 (CJE1445)<br><b>hypothetical protein gene</b>                                      | 93                      | ATAACGCAAG                                |
| <i>Campylobacter jejuni</i> subsp. <i>jejuni</i> HB93-13c_jejuni_subsp_jejunihb_13_42 (Accession: AANQ00000000) | 9                 | 1                          | GCATTGCTTTACTACATAGCCAGTCGTGTA | <i>C. jejuni</i> subsp. <i>doylei</i> 269.97 (JJD26997_1148)<br><b>conserved hypothetical protein gene</b> | 100                     | TCACACACGC                                |
| <i>Campylobacter jejuni</i> subsp. <i>jejuni</i> NW                                                             | 5                 | 2                          | TTATTTTTGTCGCTAATTGCACCTAAAGAC | <i>C. jejuni</i> subsp. <i>doylei</i> 269.97 (JJD26997_0867)<br><b>putative primase gene</b>               | 97                      | TCCAACACAT                                |

| Strain <sup>a</sup>                                                                            | Number of spacers | CRISPR Spacer <sup>b</sup> | Spacer sequence                 | Blast candidate <sup>c</sup>                                                                                                                                                                                                                                                                                                                                                                                                                                                                                                                                                                                                                                                                                                                                                                                                                                          | % Identity <sup>d</sup> | 10 bp downstream protospacer <sup>e</sup> |
|------------------------------------------------------------------------------------------------|-------------------|----------------------------|---------------------------------|-----------------------------------------------------------------------------------------------------------------------------------------------------------------------------------------------------------------------------------------------------------------------------------------------------------------------------------------------------------------------------------------------------------------------------------------------------------------------------------------------------------------------------------------------------------------------------------------------------------------------------------------------------------------------------------------------------------------------------------------------------------------------------------------------------------------------------------------------------------------------|-------------------------|-------------------------------------------|
| genomic scaffold Mich_State_Univ:Contig3 (Accession: JH376989 REGION: 13521..15062)            |                   | 5                          | GGGACACGAGGAATCCTGTCTGAATCCGGG  | <i>C. jejuni</i> subsp. <i>jejuni</i> PT14 (A911_r08426, A911_r08428, A911_r08430), NCTC 11168-BN148 (BN148_r02, BN148_r05, BN148_r08), S3 (CJS3_1811, CJS3_1817, CJS3_1830), ICDCCJ07001 (ICDCCJ07001_29, ICDCCJ07001_396, ICDCCJ07001_718), M1 (CJM1_0031, CJM1_0413, CJM1_0727), IA3902 (CJSA_Cj23SA, CJSA_Cj23SB, CJSA_Cj23SAC), BABS091400, 81116 (C8J_Cj23SA, C8J_Cj23SB, C8J_Cj23SC), 81-176 (CJJ81176_1714, CJJ81176_1727, CJJ81176_1707), NCTC 11168; <i>C. jejuni</i> DSM 4688, UNSW091300, strain 100, RP0001, 102-27 (rrlC, rrlB, rrlA), 69-30 (rrlC, rrlB, rrlA), 140-16 (rrlC, rrlB, rrlA), 110-21 (rrlC, rrlB, rrlA), RM1221 (CJE_Cj23SA, CJE_Cj23SB, CJE_Cj23SC), TGH9011_ATCC43431 (rrl); <i>C. coli</i> 59-2 (rrlC, rrlB, rrlA); <i>C. jejuni</i> subsp. <i>doylei</i> 269.97 (JJD26997_0040, JJD26997_1264, JJD26997_1520)<br><b>23S rRNA gene</b> | 100                     | TCGACCACGA                                |
| <i>Campylobacter jejuni</i> subsp. <i>doylei</i> 269.97 (Accession: NC_009707)                 | 5                 | 2                          | CTAAGCAATCTTATTTTACCATCTTTTTTA  | <i>C. jejuni</i> strain TGH 9011 (Tgh093)<br><i>C. jejuni</i> RM1221 (CJE1099)<br><b>hypothetical protein gene</b>                                                                                                                                                                                                                                                                                                                                                                                                                                                                                                                                                                                                                                                                                                                                                    | 97<br>93                | TAAACACTT<br>TAAACACTT                    |
| <i>Campylobacter jejuni</i> subsp. <i>jejuni</i> 1336 (Accession: NZ_CM000854 NZ_ADGL01000000) | 2                 | 1                          | TTACTGATATTAATAAATAACTCCATAATTT | <i>C. jejuni</i> 00-3477 (cje0227), <i>C. jejuni</i> subsp. <i>jejuni</i> S3 (CJS3_0723), ΦCGC-2007<br><b>prophage related genes</b>                                                                                                                                                                                                                                                                                                                                                                                                                                                                                                                                                                                                                                                                                                                                  | 100                     | GCTGCCATTA                                |
|                                                                                                |                   | 2                          | ATAAAGCTAATGCAAAAGTTGAAAACAAA   | <i>C. jejuni</i> NCTC 13255 (putative CJIE1-2-like prophage), 99-7046 (putative CJIE1-3-like prophage), 00-2425 (putative CJIE1 prophage), RM1221 (CJE0227) <i>C. jejuni</i> subsp. <i>jejuni</i> ICDCCJ07001 (ICDCCJ07001_691)<br><b>major tail sheath protein</b>                                                                                                                                                                                                                                                                                                                                                                                                                                                                                                                                                                                                   | 93                      | GCTGCCATTA                                |
|                                                                                                |                   | 2                          | TTTATCTGCATCCATAATGGCAATGAGTGA  | <i>C. jejuni</i> NCTC 13255 (putative CJIE1-2-like prophage), 99-7046 (putative CJIE1-3-like prophage), 00-3477 (putative CJIE1-4 Mu-like prophage), 00-2425 (putative CJIE1 prophage), RM1221 (CJE0238), <i>C. jejuni</i> subsp. <i>jejuni</i> S3 (CJS3_0704), ICDCCJ07001, <i>C. hyoilei</i><br><b>hypothetical protein gene</b>                                                                                                                                                                                                                                                                                                                                                                                                                                                                                                                                    | 100                     | AGAGCTATAA                                |
| <i>Campylobacter jejuni</i> subsp. <i>jejuni</i> 414 (Accession: NZ_CM000855 NZ_ADGM01000000)  | 33                | 2                          | TTTATCTGCATCCATAATGGCAATGAGTGA  | <i>C. jejuni</i> subsp. <i>jejuni</i> PT14 (A911_03310), NCTC 11168-BN148 (BN148_0680c), S3 (CJS3_0675), ICDCCJ07001 (ICDCCJ07001_619), M1 (CJM1_0650), IA3902 (CJSA_0644), 81116 (C8J_0632), 81-176 (CJJ81176_0703), NCTC 11168 (Cj0680c), P694a (Cj0680c), P569a (Cj0680c), P179a (Cj0680c), H73020 (Cj0680c), H704a (Cj0680c), <i>C. jejuni</i> RM1221 (CJE0778), <i>C. jejuni</i> subsp. <i>doylei</i> 269.97 (JJD26997_1327)<br><b>excinuclease ABC subunit B gene</b>                                                                                                                                                                                                                                                                                                                                                                                           | 97                      | AACTTCAGGC                                |

| Strain <sup>a</sup>                                                           | Number of spacers | CRISPR Spacer <sup>b</sup>     | Spacer sequence                  | Blast candidate <sup>c</sup>                                                                                                                                                                   | % Identity <sup>d</sup> | 10 bp downstream protospacer <sup>e</sup> |
|-------------------------------------------------------------------------------|-------------------|--------------------------------|----------------------------------|------------------------------------------------------------------------------------------------------------------------------------------------------------------------------------------------|-------------------------|-------------------------------------------|
| <i>Neisseria meningitidis</i> serogroup A strain Z2491 (Accession: NC_003116) | 2                 |                                | CTTCTGCCTTTTTACAAGCTCGCTTTCTTT   | <i>N. gonorrhoeae</i> (NGU65994, PivNG), FA 1090 (NGO1137, NGO1164, NGO1262)<br><b>invertase related genes, phage associated protein genes</b>                                                 | 97                      | CGCCGACCGG                                |
|                                                                               |                   |                                |                                  | <i>N. meningitidis</i> NZ-05/33 (NMBNZ0533_1722), M04-240196 (NMBNZ0533_1722), M01-240149 (NMBH4476_1701), H44/76 (NMBH4476_1701)<br><b>hypothetical proteins upstream of transposase gene</b> | 100                     | GTCTGATTTT                                |
|                                                                               | 3                 |                                | TTTGGTAAAGGTTTCTGTTGCGACCCGAAT   | <i>N. lactamica</i> isolate 3207487 (plasmid pNL3.2), <i>N. lactamica</i> (plasmid pNL9)                                                                                                       | 97                      | GTCTGATTTT                                |
|                                                                               |                   |                                |                                  | <i>N. gonorrhoeae</i> TDCD-NG08107, NCCP11945<br><b>intergenic region (putative phage proteins)</b>                                                                                            | 93                      | GGCTGTTTTT                                |
|                                                                               |                   |                                |                                  | <i>N. gonorrhoeae</i> NCCP11945 (NGK_1948, NGK_1990, NGK_2023)<br><b>hypothetical protein genes</b>                                                                                            | 93                      | GTCTGATTTT                                |
|                                                                               |                   |                                |                                  | <i>N. gonorrhoeae</i><br><b>intergenic region PivNG</b>                                                                                                                                        | 93                      | GTCTGATTTT                                |
|                                                                               |                   |                                |                                  | <i>N. gonorrhoeae</i> FA 1090<br><b>numerous intergenic regions in prophages</b>                                                                                                               | 93                      | GTCTGATTTT                                |
|                                                                               |                   |                                |                                  | <i>N. gonorrhoeae</i> TDCD-NG08107, <i>N. gonorrhoeae</i> NCCP11945<br><b>intergenic region (putative phage proteins)</b>                                                                      | 97                      | GGACGATTTT                                |
|                                                                               | 7                 |                                | AAATTCGTTTCAGATAGCAAACGCAGTAGT   | <i>N. lactamica</i> plasmid pNL9                                                                                                                                                               | 93                      | TGCGGCCATA                                |
|                                                                               |                   |                                |                                  | <i>N. meningitidis</i> plasmid pJS-B                                                                                                                                                           | 100                     | TACGAACATT                                |
|                                                                               | 12                |                                | GGGTAGCCAGTGCTAAAACCGCACCCGCTT   | <i>N. lactamica</i> plasmid pNL9                                                                                                                                                               | 93                      | AGCTGCTTTG                                |
|                                                                               |                   |                                |                                  | <i>N. meningitidis</i> plasmid pJS-B                                                                                                                                                           | 97                      | AGCCGCTTTG                                |
|                                                                               | 13                |                                | CCAAATAGAAATACATACGCCGAGTAATTA   | <i>N. lactamica</i> plasmid pNL9                                                                                                                                                               | 93                      | AGCTGCTTTG                                |
|                                                                               |                   |                                |                                  | <i>N. meningitidis</i> plasmid pJS-B                                                                                                                                                           | 97                      | AGCCGCTTTG                                |
| 14                                                                            |                   | TTTCTTTTTGTAATTGTTCTGCCTTTTTTA | <i>N. lactamica</i> plasmid pNL9 | 100                                                                                                                                                                                            | ATTGGATTTT              |                                           |

| Strain <sup>a</sup>                                                                                     | Number of spacers | CRISPR Spacer <sup>b</sup> | Spacer sequence                      | Blast candidate <sup>c</sup>                                                                                                                                                                               | % Identity <sup>d</sup> | 10 bp downstream protospacer <sup>e</sup> |
|---------------------------------------------------------------------------------------------------------|-------------------|----------------------------|--------------------------------------|------------------------------------------------------------------------------------------------------------------------------------------------------------------------------------------------------------|-------------------------|-------------------------------------------|
|                                                                                                         |                   |                            |                                      | <i>N. meningitidis</i> plasmid pJS-B                                                                                                                                                                       | 100                     | ATTGGATTIT                                |
|                                                                                                         |                   | 15                         | TACCCACGGCGGAAACCATTGCCACAAAAC       | <i>N. meningitidis</i> strain alpha522 draft genome (NMALPHA522_0671), H44/76 (NMBH4476_0684), 053442 ( NMCC_0153), <i>N. meningitidis</i> serogroup C FAM18 (NMC1864)<br><b>hypothetical protein gene</b> | 100                     | CCATGATTAC                                |
|                                                                                                         |                   |                            |                                      | <i>N.meningitidis</i> M04-240196 (NMBM04240196_0048, NMBM04240196_0749)<br><b>putative membrane protein gene</b>                                                                                           | 100                     | CCATGATTAC                                |
| <i>Pasteurella multocida</i> str. Pm70 (Accession: NC_002663)                                           | 5                 | 1-5                        |                                      | no significant BLAST hits                                                                                                                                                                                  |                         |                                           |
| <i>Pasteurella multocida</i> subsp. <i>gallicida</i> X73 (Accession: CM001580 AMBP01000000)             | 20                | 9                          | AAAGAATACACCCCTTATTCCAAAAAGTTTG      | <i>P. multocida</i> 1.8 kb plasmid                                                                                                                                                                         | 100                     | GCGACAGATG                                |
|                                                                                                         |                   | 15                         | GTCTGAACAGTATTAACTTCCTGTTTCT         | <i>P. multocida</i> subsp. <i>multocida</i> str. HN06(PMCN06_2098)<br><b>hypothetical protein gene</b>                                                                                                     | 97                      | GATGCTACT                                 |
| <i>Francisella tularensis</i> subsp. <i>novicida</i> U112 (Accession: NC_008601)                        | 13                | 1-13                       |                                      | no significant BLAST hits                                                                                                                                                                                  |                         |                                           |
| <i>Francisella novicida</i> FTG FTG_scaffold1 genomic scaffold (Accession: NZ_DS995363 NZ_ABXZ01000000) | 22                | 15                         | ATCTCAAAGCAGCTCTTTCGCGTGTAATATCGTT   | <i>F. cf. novicida</i> 3523 (FN3523_1002)<br><b>phage protein gene</b>                                                                                                                                     | 91                      | TGGATTAGAT                                |
|                                                                                                         |                   | 19                         | CTATCTAAGAGAACTTACAAGACAAGAGAAAATACT | <i>F. cf. novicida</i> 3523 (FN3523_0993)<br><b>hypothetical protein gene</b>                                                                                                                              | 94                      | TGGTGGTAAA                                |
| <i>Francisella tularensis</i>                                                                           | 10                | 2                          | AGCCCTATCAGAAATATATGCAAGTTTGAATATAG  | <i>F. cf. novicida</i> 3523 (FN3523_1009)<br><b>phage-related baseplate assembly protein gene</b>                                                                                                          | 89                      | AGGTTGTAGC                                |

| Strain <sup>a</sup>                                                                    | Number of spacers | CRISPR Spacer <sup>b</sup> | Spacer sequence                     | Blast candidate <sup>c</sup>                                                  | % Identity <sup>d</sup> | 10 bp downstream protospacer <sup>e</sup>                                           |
|----------------------------------------------------------------------------------------|-------------------|----------------------------|-------------------------------------|-------------------------------------------------------------------------------|-------------------------|-------------------------------------------------------------------------------------|
| subsp. <i>novicida</i> GA99-3548 supercont1.3<br>(Accession: DS264589<br>ABAH01000000) | 3                 |                            | AGATAACTCTTATATTGATTTGTATATTGAAGATA | <i>F. cf. novicida</i> 3523 (FN3523_1006)<br><b>hypothetical protein gene</b> | 94                      | 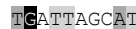 |
|                                                                                        | 4                 |                            | CGCAAAAAGGCGAATTTGAGCAGAAAATTTGGGC  | <i>F. cf. novicida</i> 3523 (FN3523_0999)<br><b>hypothetical protein gene</b> | 91                      |  |

<sup>a</sup>Selected strains used in this study. No potential protospacers were found for *Streptococcus mutans* UA159, *Campylobacter jejuni* subsp. *jejuni* NCTC 11168, *Pasteurella multocida* str. Pm70 and *Francisella tularensis* subsp. *novicida* U112. Therefore, closely related strains were analyzed for the presence of type II CRISPR-Cas arrays. Spacer sequences from selected arrays were then used to search for protospacer candidates.

<sup>b</sup>Numbering of spacers starts from the leader proximal end based on RNAseq data (15). Spacers with no significant protospacer BLAST hit are not listed in the table.

<sup>c</sup>A BLAST candidate was considered a potential protospacer when the identity to the spacer was  $\geq 90\%$  and when the protospacer originated either from phage, plasmid or genomic DNA related to the analyzed species. For each identified protospacer, the strain name, the protospacer-containing gene locus and the potential function of the gene are given.

<sup>d</sup>Percentage identity between spacer and protospacer sequence.

<sup>e</sup>10 nt sequence located directly 3' of the protospacer sequence. The identified sequences for each bacterial species were aligned using GeneDoc (<http://www.nrbsc.org/gfx/genedoc/>). The degree of conservation is indicated with a color code (black: 100%, dark grey:  $\geq 80\%$ , light grey:  $\geq 60\%$ ). These sequences were used to create the logo plot represented in Figure 5.

■ ***S. pyogenes* dual-RNA:Cas9**

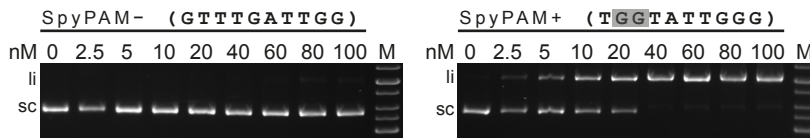

■ ***S. mutans* dual-RNA:Cas9**

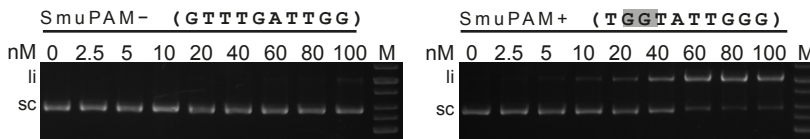

■ ***S. thermophilus*\* dual-RNA:Cas9**

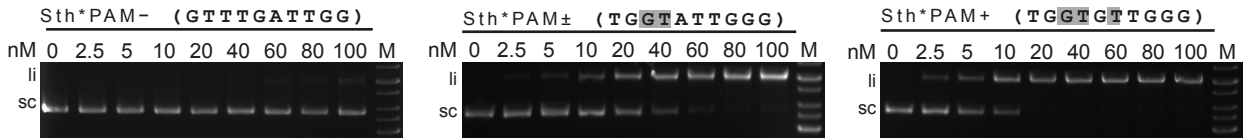

■ ***S. thermophilus*\*\* dual-RNA:Cas9**

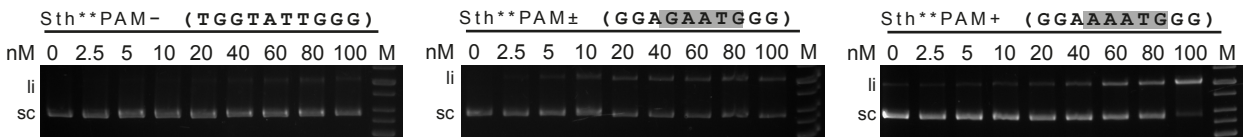

■ ***C. jejuni* dual-RNA:Cas9**

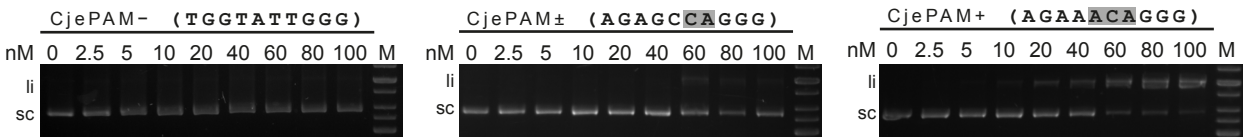

■ ***N. meningitidis* dual-RNA:Cas9**

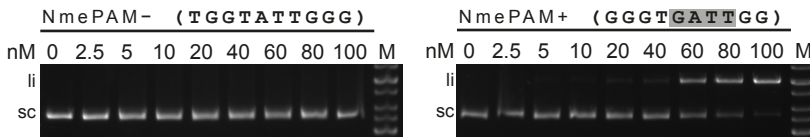

■ ***P. multocida* dual-RNA:Cas9**

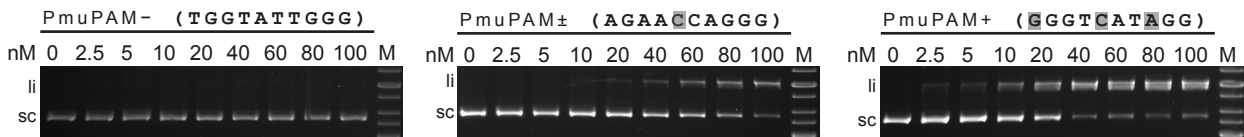

■ ***F. novicida* dual-RNA:Cas9**

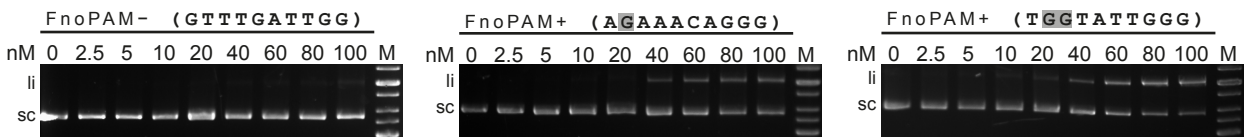

**Supplementary Figure S9. Cas9 orthologs cleave plasmid DNA in the presence of their cognate dual-RNA and specific PAM.** Agarose gel electrophoresis analysis of dual-RNA:Cas9 titration (0-100 nM dual-RNA-Cas9 complex) on plasmid DNA (5 nM) containing *speM* protospacer and adjacent WT PAM (PAM+), imperfect PAM (PAM±) or no PAM (PAM-). For *S. pyogenes*, *S. mutans*, *S. thermophilus*\*, *S. thermophilus*\*\* and *N. meningitidis*, the PAM sequence has already been published (27,28,53,54). For the other bacterial species, PAMs were predicted based on the downstream sequence of protospacer identified in the investigated or related strains (see Supplementary Table S2 and Materials and Methods). The 10 bp sequence located directly downstream of the crRNA-targeted *speM* protospacer is shown. The nucleotide(s) predicted to belong to the PAM sequence are shaded in grey. li: linear cleavage product, sc: supercoiled plasmid DNA, M: 1 kb DNA ladder.

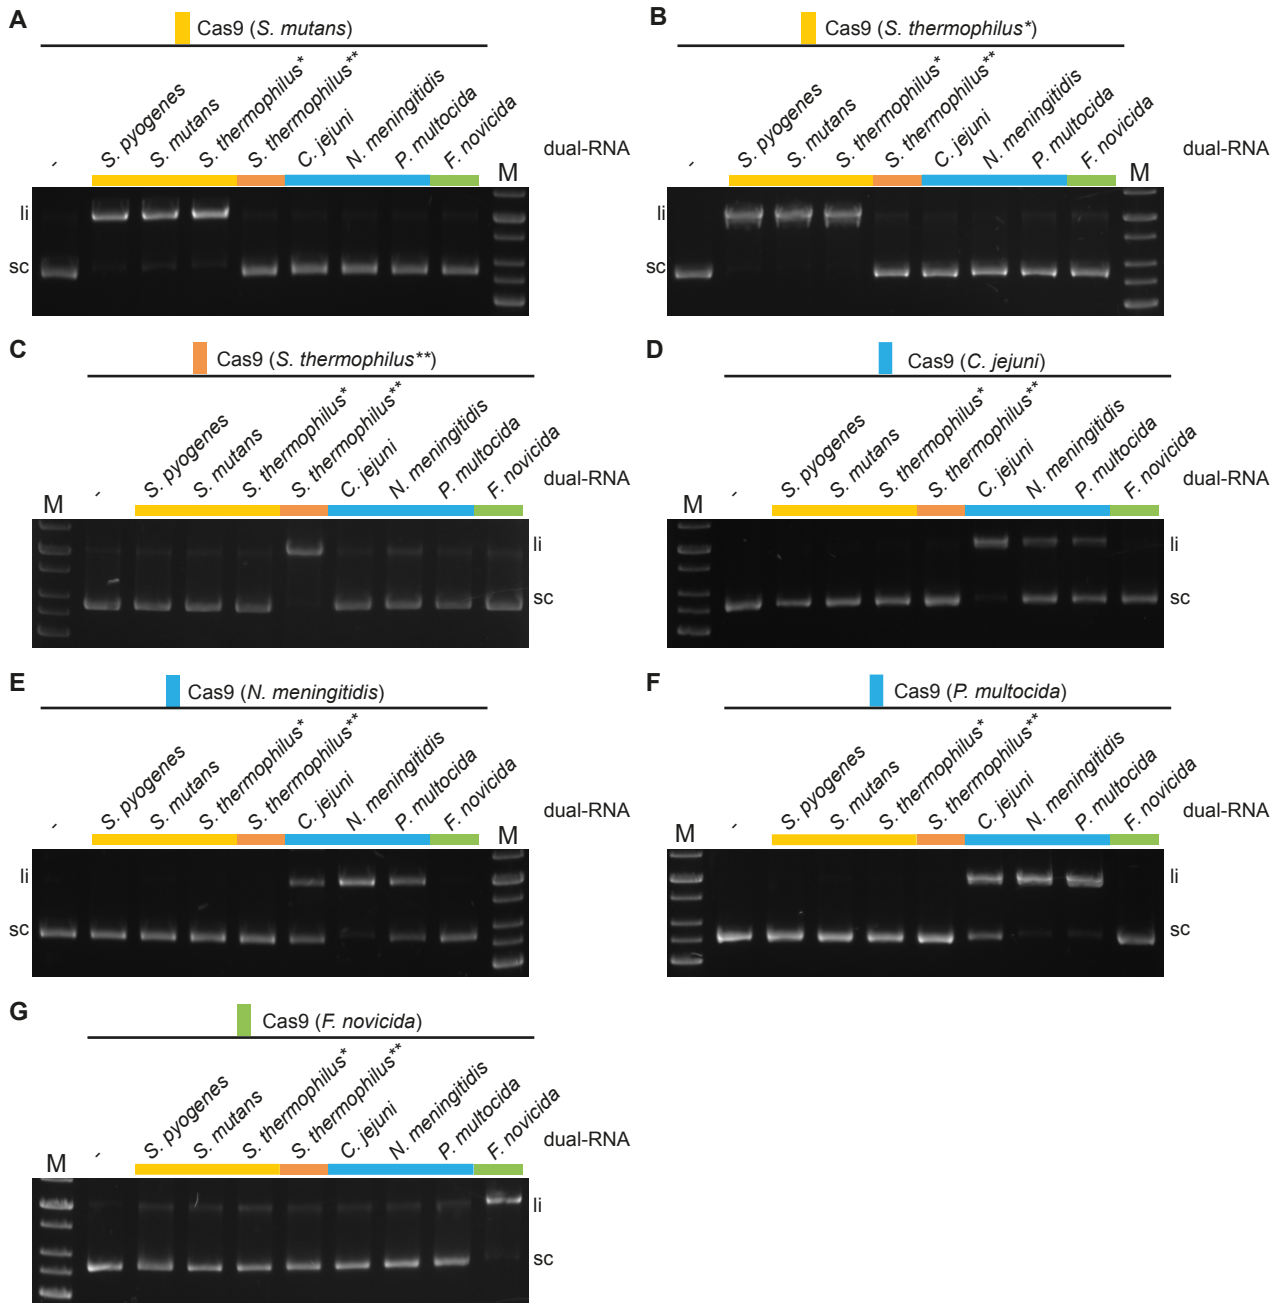

**Supplementary Figure S10. Summary of *in vitro* plasmid cleavage assays of Cas9 orthologs in combination with dual-RNAs.** Agarose gel electrophoresis of cleavage assays. (A) *S. mutans* Cas9 (50 nM), (B) *S. thermophilus*\* Cas9 (25 nM), (C) *S. thermophilus*\*\* Cas9 (100 nM), (D) *C. jejuni* Cas9 (100 nM), (E) *N. meningitidis* Cas9 (100 nM), (F) *P. multocida* Cas9 (25 nM), (G) *F. novicida* Cas9 (100 nM) in complex with equimolar concentrations of each of the dual-RNA orthologs were incubated with plasmid DNA (5 nM) containing *speM* protospacer sequence and the PAM sequence specific to the Cas9 ortholog analyzed. li: linear cleavage product, sc: supercoiled plasmid DNA, M: 1 kb DNA ladder.

**Supplementary Table S4. Cas9 is present in bacteria from 12 different phyla and diverse habitats.**

| Strain <sup>a</sup>                              | Class                     | Isolation/habitat <sup>b</sup>     |
|--------------------------------------------------|---------------------------|------------------------------------|
| <b>Actinobacteria</b>                            |                           |                                    |
| <b>Actinobacteridae</b>                          |                           |                                    |
| <i>Acidothermus cellulolyticus</i> 11B           | <i>Acidothermaceae</i>    | extremophile (hot water spring)    |
| <i>Actinomyces coleocanis</i> DSM 15436          | <i>Actinomycetaceae</i>   | dog genital tract                  |
| <i>Actinomyces georgiae</i> F0490                | <i>Actinomycetaceae</i>   | oral cavity                        |
| <i>Actinomyces naeslundii</i> str. Howell 279    | <i>Actinomycetaceae</i>   | oral cavity                        |
| <i>Actinomyces</i> sp. ICM47                     | <i>Actinomycetaceae</i>   | ND                                 |
| <i>Actinomyces</i> sp. oral taxon 175 str. F0384 | <i>Actinomycetaceae</i>   | oral cavity                        |
| <i>Actinomyces</i> sp. oral taxon 180 str. F0310 | <i>Actinomycetaceae</i>   | oral cavity                        |
| <i>Actinomyces</i> sp. oral taxon 181 str. F0379 | <i>Actinomycetaceae</i>   | oral cavity                        |
| <i>Actinomyces</i> sp. oral taxon 848 str. F0332 | <i>Actinomycetaceae</i>   | oral cavity                        |
| <i>Actinomyces turicensis</i> ACS-279-V-Col4     | <i>Actinomycetaceae</i>   | genital tract                      |
| <i>Bifidobacterium bifidum</i> S17               | <i>Bifidobacteriaceae</i> | gastrointestinal tract/feces       |
| <i>Bifidobacterium dentium</i> Bd1               | <i>Bifidobacteriaceae</i> | oral cavity                        |
| <i>Bifidobacterium longum</i> DJO10A             | <i>Bifidobacteriaceae</i> | gastrointestinal tract/feces       |
| <i>Bifidobacterium</i> sp. 12_1_47BFAA           | <i>Bifidobacteriaceae</i> | gastrointestinal tract/feces       |
| <i>Corynebacterium accolens</i> ATCC 49726       | <i>Corynebacterineae</i>  | wound                              |
| <i>Corynebacterium diptheriae</i> NCTC 13129     | <i>Corynebacterineae</i>  | oral cavity                        |
| <i>Corynebacterium matruchotii</i> ATCC 14266    | <i>Corynebacterineae</i>  | oral cavity                        |
| <i>Gardnerella vaginalis</i> 5-1                 | <i>Bifidobacteriaceae</i> | genital tract                      |
| <i>Mobiluncus curtisii</i> ATCC 35242            | <i>Actinomycetaceae</i>   | genital tract                      |
| <i>Mobiluncus mulieris</i> 28-1                  | <i>Actinomycetaceae</i>   | genital tract                      |
| <i>Scardovia inopinata</i> F0304                 | <i>Bifidobacteriaceae</i> | oral cavity                        |
| <i>Scardovia wiggisiae</i> F0424                 | <i>Bifidobacteriaceae</i> | oral cavity                        |
| <b>Coriobacteridae</b>                           |                           |                                    |
| <i>Coriobacterium glomerans</i> PW2              | <i>Coriobacteriaceae</i>  | invertebrate (red soldier bug)     |
| <i>Eggerthella</i> sp. YY7918                    | <i>Coriobacteriaceae</i>  | gastrointestinal tract/feces       |
| <i>Gordonibacter pamelaiae</i> 7-10-1-b          | <i>Coriobacteriaceae</i>  | gastrointestinal tract/feces       |
| <i>Olsenella uli</i> DSM 7084                    | <i>Coriobacteriaceae</i>  | oral cavity                        |
| <b>Bacteroidetes</b>                             |                           |                                    |
| <b>Bacteroidia</b>                               |                           |                                    |
| <i>Anaerophaga</i> sp. HS1                       | <i>Marinilabiliaceae</i>  | extremophile (hot water spring)    |
| <i>Anaerophaga thermohalophila</i> DSM 12881     | <i>Marinilabiliaceae</i>  | environmental sample (oil residue) |
| <i>Bacteroides cellulosityticus</i> DSM 14838    | <i>Bacteroidaceae</i>     | gastrointestinal tract/feces       |
| <i>Bacteroides coprophilus</i> DSM 18228         | <i>Bacteroidaceae</i>     | gastrointestinal tract/feces       |
| <i>Bacteroides coprosuis</i> DSM 18011           | <i>Bacteroidaceae</i>     | pig feces                          |
| <i>Bacteroides dorei</i> DSM 17855               | <i>Bacteroidaceae</i>     | gastrointestinal tract/feces       |
| <i>Bacteroides eggerthii</i> 1_2_48FAA           | <i>Bacteroidaceae</i>     | gastrointestinal tract/feces       |
| <i>Bacteroides faecis</i> MAJ27                  | <i>Bacteroidaceae</i>     | gastrointestinal tract/feces       |
| <i>Bacteroides fluxus</i> YIT 12057              | <i>Bacteroidaceae</i>     | gastrointestinal tract/feces       |
| <i>Bacteroides fragilis</i> NCTC9343             | <i>Bacteroidaceae</i>     | gastrointestinal tract/feces       |
| <i>Bacteroides nordii</i> CL02T12C05             | <i>Bacteroidaceae</i>     | gastrointestinal tract/feces       |
| <i>Bacteroides oleiciplenus</i> YIT 12058        | <i>Bacteroidaceae</i>     | gastrointestinal tract/feces       |
| <i>Bacteroides</i> sp. 2_1_16                    | <i>Bacteroidaceae</i>     | gastrointestinal tract/feces       |
| <i>Bacteroides</i> sp. 203                       | <i>Bacteroidaceae</i>     | gastrointestinal tract/feces       |
| <i>Bacteroides</i> sp. 3_1_19                    | <i>Bacteroidaceae</i>     | gastrointestinal tract/feces       |
| <i>Bacteroides</i> sp. 3_1_33FAA                 | <i>Bacteroidaceae</i>     | gastrointestinal tract/feces       |
| <i>Bacteroides</i> sp. 9_1_42FAA                 | <i>Bacteroidaceae</i>     | gastrointestinal tract/feces       |
| <i>Bacteroides</i> sp. D2                        | <i>Bacteroidaceae</i>     | gastrointestinal tract/feces       |
| <i>Bacteroides uniformis</i> CL03T00C23          | <i>Bacteroidaceae</i>     | gastrointestinal tract/feces       |
| <i>Bacteroides vulgatus</i> CL09T03C04           | <i>Bacteroidaceae</i>     | gastrointestinal tract/feces       |
| <i>Bacteroidetes</i> oral taxon 274 str. F0058   | <i>Bacteroidaceae</i>     | oral cavity                        |
| <i>Barnesiella intestinhominis</i> YIT 11860     | <i>Bacteroidaceae</i>     | gastrointestinal tract/feces       |



| Strain <sup>a</sup>                                 | Class                     | Isolation/habitat <sup>b</sup>              |
|-----------------------------------------------------|---------------------------|---------------------------------------------|
| <b>Bacteroidia (continued)</b>                      |                           |                                             |
| <i>Marinilabilia</i> sp. AK2                        | <i>Marinilabiliaceae</i>  | extremophile (solar saltern)                |
| <i>Odoribacter laneus</i> YIT 12061                 | <i>Porphyromonadaceae</i> | gastrointestinal tract/feces                |
| <i>Parabacteroides johnsonii</i> DSM 18315          | <i>Bacteroidaceae</i>     | gastrointestinal tract/feces                |
| <i>Parabacteroides</i> sp. D13                      | <i>Bacteroidaceae</i>     | gastrointestinal tract/feces                |
| <i>Porphyromonas catoniae</i> F0037                 | <i>Porphyromonadaceae</i> | oral cavity                                 |
| <i>Porphyromonas</i> sp. oral taxon 279 str. F0450  | <i>Porphyromonadaceae</i> | oral cavity                                 |
| <i>Prevotella bivia</i> JCVIHMP010                  | <i>Prevotellaceae</i>     | genital tract                               |
| <i>Prevotella buccae</i> ATCC 33574                 | <i>Prevotellaceae</i>     | oral cavity                                 |
| <i>Prevotella buccalis</i> ATCC 35310               | <i>Prevotellaceae</i>     | oral cavity                                 |
| <i>Prevotella denticola</i> F0289                   | <i>Prevotellaceae</i>     | oral cavity                                 |
| <i>Prevotella disiens</i> FB035-09AN                | <i>Prevotellaceae</i>     | oral cavity                                 |
| <i>Prevotella histicola</i> F0411                   | <i>Prevotellaceae</i>     | oral cavity                                 |
| <i>Prevotella intermedia</i> 17                     | <i>Prevotellaceae</i>     | oral cavity                                 |
| <i>Prevotella melaninogenica</i> D18                | <i>Prevotellaceae</i>     | oral cavity/rumen                           |
| <i>Prevotella micans</i> F0438                      | <i>Prevotellaceae</i>     | oral cavity                                 |
| <i>Prevotella multififormis</i> DSM 16608           | <i>Prevotellaceae</i>     | oral cavity                                 |
| <i>Prevotella nigrescens</i> ATCC 33563             | <i>Prevotellaceae</i>     | oral cavity                                 |
| <i>Prevotella oralis</i> ATCC 33269                 | <i>Prevotellaceae</i>     | oral cavity                                 |
| <i>Prevotella oulorum</i> F0390                     | <i>Prevotellaceae</i>     | oral cavity                                 |
| <i>Prevotella ruminicola</i> 23                     | <i>Prevotellaceae</i>     | rumen                                       |
| <i>Prevotella saccharolytica</i> F0055              | <i>Prevotellaceae</i>     | oral cavity                                 |
| <i>Prevotella</i> sp. C561                          | <i>Prevotellaceae</i>     | oral cavity                                 |
| <i>Prevotella</i> sp. MSX73                         | <i>Prevotellaceae</i>     | oral cavity                                 |
| <i>Prevotella</i> sp. oral taxon 306 str. F0472     | <i>Prevotellaceae</i>     | oral cavity                                 |
| <i>Prevotella</i> sp. oral taxon 317 str. F0108     | <i>Prevotellaceae</i>     | oral cavity                                 |
| <i>Prevotella</i> sp. oral taxon 472 str. F0295     | <i>Prevotellaceae</i>     | oral cavity                                 |
| <i>Prevotella stercorea</i> DSM 18206               | <i>Prevotellaceae</i>     | gastrointestinal tract/feces                |
| <i>Prevotella tanneriae</i> ATCC 51259              | <i>Prevotellaceae</i>     | oral cavity                                 |
| <i>Prevotella timonensis</i> CRIS 5C-B1             | <i>Prevotellaceae</i>     | wound (breast abscess)                      |
| <i>Prevotella veroralis</i> F0319                   | <i>Prevotellaceae</i>     | oral cavity                                 |
| <i>Tannerella</i> sp. 6_1_58FAA_CT1                 | <i>Porphyromonadaceae</i> | gastrointestinal tract/feces                |
| <b>Cytophagia</b>                                   |                           |                                             |
| <i>Belliella baltica</i> DSM 15883                  | <i>Cyclobacteriaceae</i>  | environmental sample (groundwater)          |
| <i>Indibacter alkaliphilus</i> LW1                  | <i>Cyclobacteriaceae</i>  | extremophile (soda lake)                    |
| <i>Nitritalea halalkaliphila</i> LW7                | <i>Cyclobacteriaceae</i>  | extremophile (saline soda lake)             |
| <b>Flavobacteria</b>                                |                           |                                             |
| <i>Bergeyella zoohelcum</i> ATCC 43767              | <i>Flavobacteriaceae</i>  | oral cavity                                 |
| <i>Capnocytophaga canimorsus</i> Cc5                | <i>Flavobacteriaceae</i>  | dog and cat oral cavity/zoonotic infections |
| <i>Capnocytophaga gingivalis</i> ATCC 33624         | <i>Flavobacteriaceae</i>  | oral cavity                                 |
| <i>Capnocytophaga ochracea</i> DSM 7271             | <i>Flavobacteriaceae</i>  | oral cavity                                 |
| <i>Capnocytophaga</i> sp. CM59                      | <i>Flavobacteriaceae</i>  | oral cavity                                 |
| <i>Capnocytophaga</i> sp. oral taxon 324 str. F0483 | <i>Flavobacteriaceae</i>  | oral cavity                                 |
| <i>Capnocytophaga</i> sp. oral taxon 326 str. F0382 | <i>Flavobacteriaceae</i>  | oral cavity                                 |
| <i>Capnocytophaga</i> sp. oral taxon 329 str. F0087 | <i>Flavobacteriaceae</i>  | oral cavity                                 |
| <i>Capnocytophaga</i> sp. oral taxon 335 str. F0486 | <i>Flavobacteriaceae</i>  | oral cavity                                 |
| <i>Capnocytophaga</i> sp. oral taxon 380 str. F0488 | <i>Flavobacteriaceae</i>  | oral cavity                                 |
| <i>Capnocytophaga</i> sp. oral taxon 412 str. F0487 | <i>Flavobacteriaceae</i>  | oral cavity                                 |
| <i>Capnocytophaga sputigena</i> ATCC 33612          | <i>Flavobacteriaceae</i>  | oral cavity                                 |
| <i>Chryseobacterium</i> sp. CF314                   | <i>Flavobacteriaceae</i>  | vegetation                                  |
| <i>Flavobacteriaceae</i> bacterium S85              | <i>Flavobacteriaceae</i>  | environmental sample (seawater)             |
| <i>Flavobacterium branchiophilum</i> FL-15          | <i>Flavobacteriaceae</i>  | fish pathogen                               |
| <i>Flavobacterium columnare</i> ATCC 49512          | <i>Flavobacteriaceae</i>  | fish pathogen                               |
| <i>Flavobacterium psychrophilum</i> JIP02/86        | <i>Flavobacteriaceae</i>  | fish pathogen                               |
| <i>Fluviicola taffensis</i> DSM 16823               | <i>Cryomorphaceae</i>     | environmental sample (fresh water)          |
| <i>Galbibacter</i> sp. ck-12-15                     | <i>Flavobacteriaceae</i>  | extremophile (deep sea sediment)            |
| <i>Joostella marina</i> DSM 19592                   | <i>Flavobacteriaceae</i>  | environmental sample (seawater)             |
| <i>Kordia algicida</i> OT-1                         | <i>Flavobacteriaceae</i>  | environmental sample (seawater)             |
| <i>Myroides injenensis</i> M09-0166                 | <i>Flavobacteriaceae</i>  | human clinical specimens                    |
| <i>Myroides odoratus</i> DSM 2801                   | <i>Flavobacteriaceae</i>  | fish                                        |

| Strain <sup>a</sup>                                                    | Class               | Isolation/habitat <sup>b</sup>   |
|------------------------------------------------------------------------|---------------------|----------------------------------|
| <b>Flavobacteria (continued)</b>                                       |                     |                                  |
| <i>Ornithobacterium rhinotracheale</i> DSM 15997                       | Flavobacteriaceae   | bird respiratory tract           |
| <i>Psychroflexus torquis</i> ATCC 700755                               | Flavobacteriaceae   | extremophile (antarctic ice)     |
| <i>Riemerella anatipestifer</i> ATCC 11845 = DSM 15868                 | Flavobacteriaceae   | bird                             |
| <i>Weeksella virosa</i> DSM 16922                                      | Flavobacteriaceae   | genital tract/urine              |
| <i>Zunongwangia profunda</i> SM-A87                                    | Flavobacteriaceae   | extremophile (deep sea sediment) |
| <b>Sphingobacteria</b>                                                 |                     |                                  |
| <i>Mucilaginibacter paludis</i> DSM 18603                              | Sphingobacteriaceae | food (fermented)                 |
| <i>Niabella soli</i> DSM 19437                                         | Chitinophagaceae    | environmental sample (soil)      |
| <i>Sphingobacterium spiritivorum</i> ATCC 33861                        | Sphingobacteriaceae | human clinical specimens         |
| <b>Firmicutes</b>                                                      |                     |                                  |
| <b>Bacilli</b>                                                         |                     |                                  |
| <i>Alicyclophilus denitrificans</i> K601                               | Alicyclobacillaceae | environmental sample (sewage)    |
| <i>Alicyclobacillus hesperidum</i> URH17-3-68                          | Alicyclobacillaceae | extremophile (hot water spring)  |
| <i>Bacillus cereus</i> Rock1-15                                        | Bacillaceae         | environmental sample (soil)      |
| <i>Bacillus smithii</i> 7 3 47FAA                                      | Bacillaceae         | human clinical specimens         |
| <i>Bacillus thuringiensis</i> serovar <i>finitimus</i> YBT-020         | Bacillaceae         | environmental sample (soil)      |
| <i>Brevibacillus laterosporus</i> GI-9                                 | Paenibacillaceae    | environmental sample (soil)      |
| <i>Catelicoccus marimammalium</i> M35/04/3                             | Enterococcaceae     | grey seal gastrointestinal tract |
| <i>Dolosigranulum pigrum</i> ATCC 51524                                | Carnobacteriaceae   | human clinical specimens         |
| <i>Enterococcus faecalis</i> TX0012                                    | Enterococcaceae     | gastrointestinal tract/feces     |
| <i>Enterococcus faecium</i> 1231408                                    | Enterococcaceae     | gastrointestinal tract/feces     |
| <i>Enterococcus hirae</i> ATCC 9790                                    | Enterococcaceae     | gastrointestinal tract/feces     |
| <i>Enterococcus italicus</i> DSM 15952                                 | Enterococcaceae     | food (fermented)                 |
| <i>Enterococcus</i> sp. 7L76                                           | Enterococcaceae     | gastrointestinal tract/feces     |
| <i>Facklamia hominis</i> CCUG 36813                                    | Aerococcaceae       | buruncle (human)                 |
| <i>Fructobacillus fructosus</i> KCTC 3544                              | Leuconostocaceae    | vegetation                       |
| <i>Gemella haemolysans</i> ATCC 10379                                  | Streptococcaceae    | oral cavity                      |
| <i>Gemella moribillum</i> M424                                         | Streptococcaceae    | gastrointestinal tract/feces     |
| <i>Lactobacillus animalis</i> KCTC 3501                                | Lactobacillaceae    | food (fermented)                 |
| <i>Lactobacillus brevis</i> subsp. <i>gravesensis</i> ATCC 27305       | Lactobacillaceae    | food (fermented)                 |
| <i>Lactobacillus buchneri</i> ATCC 11577                               | Lactobacillaceae    | food (fermented)                 |
| <i>Lactobacillus casei</i> str. Zhang                                  | Lactobacillaceae    | gastrointestinal tract/feces     |
| <i>Lactobacillus coryniformis</i> subsp. <i>coryniformis</i> KCTC 3167 | Lactobacillaceae    | food (fermented)                 |
| <i>Lactobacillus coryniformis</i> subsp. <i>torquens</i> KCTC 3535     | Lactobacillaceae    | food (fermented)                 |
| <i>Lactobacillus crispatus</i> FB049-03                                | Lactobacillaceae    | genital tract                    |
| <i>Lactobacillus curvatus</i> CRL 705                                  | Lactobacillaceae    | food (fermented)                 |
| <i>Lactobacillus delbrueckii</i> subsp. <i>bulgaricus</i> 2038         | Lactobacillaceae    | food (fermented)                 |
| <i>Lactobacillus farciminis</i> KCTC 3681                              | Lactobacillaceae    | food (fermented)                 |
| <i>Lactobacillus fermentum</i> ATCC 14931                              | Lactobacillaceae    | food (fermented)                 |
| <i>Lactobacillus florum</i> 2F                                         | Lactobacillaceae    | vegetation                       |
| <i>Lactobacillus gasseri</i> JV-V03                                    | Lactobacillaceae    | oral cavity                      |
| <i>Lactobacillus hominis</i> CRBIP 24.179                              | Lactobacillaceae    | gastrointestinal tract/feces     |
| <i>Lactobacillus iners</i> LactinV 11V1-d                              | Lactobacillaceae    | genital tract/urine              |
| <i>Lactobacillus jensenii</i> 269-3                                    | Lactobacillaceae    | genital tract/blood              |
| <i>Lactobacillus johnsonii</i> DPC 6026                                | Lactobacillaceae    | pig gastrointestinal tract       |
| <i>Lactobacillus mucosae</i> LM1                                       | Lactobacillaceae    | wild pig gastrointestinal tract  |
| <i>Lactobacillus paracasei</i> subsp. <i>paracasei</i> 8700:2          | Lactobacillaceae    | food (fermented)                 |
| <i>Lactobacillus pentosus</i> IG1                                      | Lactobacillaceae    | food (fermented)                 |
| <i>Lactobacillus plantarum</i> ZJ316                                   | Lactobacillaceae    | gastrointestinal tract/feces     |
| <i>Lactobacillus rhamnosus</i> GG                                      | Lactobacillaceae    | gastrointestinal tract/feces     |
| <i>Lactobacillus ruminis</i> ATCC 25644                                | Lactobacillaceae    | rumen                            |
| <i>Lactobacillus salivarius</i> UCC118                                 | Lactobacillaceae    | oral cavity                      |
| <i>Lactobacillus sanfranciscensis</i> TMW 1-1304                       | Lactobacillaceae    | food (fermented)                 |
| <i>Lactobacillus</i> sp. 66c                                           | Lactobacillaceae    | ND                               |
| <i>Lactobacillus versmoldensis</i> KCTC 3814                           | Lactobacillaceae    | food (fermented)                 |
| <i>Leuconostoc gelidum</i> KCTC 3527                                   | Leuconostocaceae    | food (fermented)                 |
| <i>Leuconostoc pseudomesenteroides</i> 4882                            | Leuconostocaceae    | food (fermented)                 |

| Strain <sup>a</sup>                                               | Class                 | Isolation/habitat <sup>b</sup>         |
|-------------------------------------------------------------------|-----------------------|----------------------------------------|
| <b>Bacilli (continued)</b>                                        |                       |                                        |
| <i>Listeria innocua</i> Clip11262                                 | Listeriaceae          | environmental sample (soil)            |
| <i>Listeria ivanovii</i> FSL F6-596                               | Listeriaceae          | animal and human/environmental samples |
| <i>Listeria monocytogenes</i> str. 1/2a F6854                     | Listeriaceae          | animal and human/environmental samples |
| <i>Listeria seeligeri</i> FSL N1-067                              | Listeriaceae          | animal and human/environmental samples |
| Listeriaceae bacterium TTU M1-001                                 | Listeriaceae          | environmental sample (soil)            |
| <i>Oenococcus kitaharae</i> DSM 17330                             | Leuconostocaceae      | food (fermented)                       |
| <i>Pediococcus acidilactici</i> DSM 20284                         | Lactobacillaceae      | vegetation                             |
| <i>Pediococcus lolii</i> NGRI 0510Q                               | Lactobacillaceae      | vegetation (fermented)                 |
| <i>Planococcus antarcticus</i> DSM 14505                          | Planococcaceae        | extremophile (antarctic)               |
| <i>Sporolactobacillus vineae</i> DSM 21990 = SL153                | Sporolactobacillaceae | environmental sample (soil)            |
| <i>Staphylococcus aureus</i> subsp. <i>aureus</i>                 | Staphylococcaceae     | human clinical specimens               |
| <i>Staphylococcus lugdunensis</i> M23590                          | Staphylococcaceae     | human clinical specimens               |
| <i>Staphylococcus massiliensis</i> S46                            | Staphylococcaceae     | skin                                   |
| <i>Staphylococcus pseudintermedius</i> ED99                       | Staphylococcaceae     | dog skin                               |
| <i>Staphylococcus simulans</i> ACS-120-V-Sch1                     | Staphylococcaceae     | genital tract                          |
| <i>Streptococcus agalactiae</i> 2603V/R                           | Streptococcaceae      | gastrointestinal tract/feces           |
| <i>Streptococcus anginosus</i> F0211                              | Streptococcaceae      | oral cavity                            |
| <i>Streptococcus bovis</i> ATCC 700338                            | Streptococcaceae      | rumen/zoonotic infections              |
| <i>Streptococcus canis</i> FSL Z3-227                             | Streptococcaceae      | food (fermented)                       |
| <i>Streptococcus constellatus</i> subsp. <i>constellatus</i> SK53 | Streptococcaceae      | human clinical specimens               |
| <i>Streptococcus downei</i> F0415                                 | Streptococcaceae      | monkey oral cavity                     |
| <i>Streptococcus dysgalactiae</i> DSM 12112                       | Streptococcaceae      | various animals/zoonotic infections    |
| <i>Streptococcus equi</i> subsp. <i>zoepidemicus</i> MGCS10565    | Streptococcaceae      | horse respiratory tract                |
| <i>Streptococcus equinus</i> ATCC 9812                            | Streptococcaceae      | ruminants alimentary tract             |
| <i>Streptococcus gallolyticus</i> UCN34                           | Streptococcaceae      | ruminants alimentary tract             |
| <i>Streptococcus gordonii</i> str. Challis substr. CH1            | Streptococcaceae      | oral cavity                            |
| <i>Streptococcus infantarius</i> ATCC BAA-102                     | Streptococcaceae      | gastrointestinal tract/feces           |
| <i>Streptococcus iniae</i> 9117                                   | Streptococcaceae      | fish/human pathogen                    |
| <i>Streptococcus macacae</i> NCTC 11558                           | Streptococcaceae      | monkey oral cavity                     |
| <i>Streptococcus macedonicus</i> ACA-DC 198                       | Streptococcaceae      | food (fermented)                       |
| <i>Streptococcus mitis</i> ATCC 6249                              | Streptococcaceae      | oral cavity                            |
| <i>Streptococcus mutans</i> UA159                                 | Streptococcaceae      | oral cavity                            |
| <i>Streptococcus oralis</i> SK1074                                | Streptococcaceae      | oral cavity                            |
| <i>Streptococcus parasanguinis</i> F0449                          | Streptococcaceae      | oral cavity                            |
| <i>Streptococcus pasteurianus</i> ATCC 43144                      | Streptococcaceae      | oral cavity                            |
| <i>Streptococcus pseudoporcinus</i> SPIN 20026                    | Streptococcaceae      | blood                                  |
| <i>Streptococcus pyogenes</i> SF370                               | Streptococcaceae      | genital tract                          |
| <i>Streptococcus rattus</i> FA-1 = DSM 20564                      | Streptococcaceae      | oral cavity/wounds                     |
| <i>Streptococcus salivarius</i> JIM8777                           | Streptococcaceae      | rat oral cavity                        |
| <i>Streptococcus sanguinis</i> VMC66                              | Streptococcaceae      | oral cavity                            |
| <i>Streptococcus</i> sp. BS35b                                    | Streptococcaceae      | oral cavity                            |
| <i>Streptococcus</i> sp. C150                                     | Streptococcaceae      | oral cavity                            |
| <i>Streptococcus</i> sp. C300                                     | Streptococcaceae      | oral cavity (expectorated sputum)      |
| <i>Streptococcus</i> sp. F0441                                    | Streptococcaceae      | oral cavity (expectorated sputum)      |
| <i>Streptococcus</i> sp. F0441                                    | Streptococcaceae      | oral cavity                            |
| <i>Streptococcus</i> sp. GMD4S                                    | Streptococcaceae      | oral cavity                            |
| <i>Streptococcus</i> sp. GMD6S                                    | Streptococcaceae      | oral cavity                            |
| <i>Streptococcus</i> sp. M334                                     | Streptococcaceae      | oral cavity                            |
| <i>Streptococcus</i> sp. oral taxon 056 str. F0418                | Streptococcaceae      | oral cavity (expectorated sputum)      |
| <i>Streptococcus</i> sp. oral taxon 071 str. 73H25AP              | Streptococcaceae      | oral cavity                            |
| <i>Streptococcus suis</i> 89/1591                                 | Streptococcaceae      | oral cavity                            |
| <i>Streptococcus thermophilus</i> LMD-9                           | Streptococcaceae      | pig                                    |
| <i>Streptococcus vestibularis</i> ATCC 49124                      | Streptococcaceae      | food (fermented)                       |
|                                                                   | Streptococcaceae      | oral cavity                            |
| <b>Clostridia</b>                                                 |                       |                                        |
| <i>Acidaminococcus intestini</i> RyC-MR95                         | Acidaminococcaceae    | wound/abscess                          |
| <i>Acidaminococcus</i> sp. D21                                    | Acidaminococcaceae    | gastrointestinal tract/feces           |
| <i>Aminomonas paucivorans</i> DSM 12260                           | Syntrophomonadaceae   | environmental sample (sewage)          |
| <i>Anaerococcus tetradius</i> ATCC 35098                          | Peptostreptococcaceae | human clinical specimens               |
| <i>Butyrivibrio fibrisolvens</i> 16/4                             | Lachnospiraceae       | rumen                                  |
| <i>Catenibacterium mitsuokai</i> DSM 15897                        | Lachnospiraceae       | gastrointestinal tract/feces           |
| <i>Clostridium cellulolyticum</i> H10                             | Clostridiaceae        | vegetation (composted)                 |

| Strain <sup>a</sup>                                           | Class                          | Isolation/habitat <sup>b</sup>                    |
|---------------------------------------------------------------|--------------------------------|---------------------------------------------------|
| <b>Clostridia (continued)</b>                                 |                                |                                                   |
| <i>Clostridium perfringens</i> D str. JGS1721                 | <i>Clostridiaceae</i>          | environmental sample (vegetation/marine sediment) |
| <i>Clostridium spiroforme</i> DSM 1552                        | <i>Clostridiaceae</i>          | gastrointestinal tract/feces                      |
| <i>Coprococcus catus</i> GD/7                                 | <i>Lachnospiraceae</i>         | gastrointestinal tract/feces                      |
| <i>Coprococcus comes</i> ATCC 27758                           | <i>Lachnospiraceae</i>         | gastrointestinal tract/feces                      |
| <i>Dorea longicatena</i> DSM 13814                            | <i>Clostridiaceae</i>          | gastrointestinal tract/feces                      |
| <i>Eubacterium dolichum</i> DSM 3991                          | <i>Eubacteriaceae</i>          | gastrointestinal tract/feces                      |
| <i>Eubacterium rectale</i> ATCC 33656                         | <i>Eubacteriaceae</i>          | gastrointestinal tract/feces                      |
| <i>Eubacterium</i> sp. AS15                                   | <i>Eubacteriaceae</i>          | oral cavity                                       |
| <i>Eubacterium ventriosum</i> ATCC 27560                      | <i>Eubacteriaceae</i>          | gastrointestinal tract/feces                      |
| <i>Eubacterium yurii</i> subsp. <i>margaretiae</i> ATCC 43715 | <i>Peptostreptococcaceae</i>   | oral cavity                                       |
| <i>Filifactor alocis</i> ATCC 35896                           | <i>Peptostreptococcaceae</i>   | cat and human oral cavity                         |
| <i>Finegoldia magna</i> ATCC 29328                            | <i>Peptostreptococcaceae</i>   | oral cavity                                       |
| <i>Helcococcus kunzii</i> ATCC 51366                          | <i>Clostridiales Family XI</i> | wound                                             |
| <i>Oribacterium sinus</i> F0268                               | <i>Lachnospiraceae</i>         | human clinical specimens                          |
| <i>Peptoniphilus duerdenii</i> ATCC BAA-1640                  | <i>Peptostreptococcaceae</i>   | wound                                             |
| <i>Peptoniphilus</i> sp. oral taxon 386 str. F0131            | <i>Peptostreptococcaceae</i>   | oral cavity                                       |
| <i>Phascolarctobacterium</i> sp. YIT 12067                    | <i>Acidaminococcaceae</i>      | gastrointestinal tract/feces                      |
| <i>Phascolarctobacterium succinatutens</i> YIT 12067          | <i>Acidaminococcaceae</i>      | gastrointestinal tract/feces                      |
| <i>Pseudoramibacter alactolyticus</i> ATCC 23263              | <i>Clostridiaceae</i>          | oral cavity                                       |
| <i>Roseburia intestinalis</i> L1-82                           | <i>Lachnospiraceae</i>         | gastrointestinal tract/feces                      |
| <i>Roseburia inulinivorans</i> DSM 16841                      | <i>Lachnospiraceae</i>         | gastrointestinal tract/feces                      |
| <i>Ruminococcus albus</i> 8                                   | <i>Ruminococcaceae</i>         | gastrointestinal tract/feces                      |
| <i>Ruminococcus lactaris</i> ATCC 29176                       | <i>Ruminococcaceae</i>         | gastrointestinal tract/feces                      |
| <i>Subdoligranulum</i> sp. 4_3_54A2FAA                        | <i>Ruminococcaceae</i>         | gastrointestinal tract/feces                      |
| <b>Negativicutes</b>                                          |                                |                                                   |
| <i>Megasphaera</i> sp. UPII 135-E                             | <i>Veillonellaceae</i>         | rumen                                             |
| <i>Veillonella atypica</i> ACS-134-V-Col7a                    | <i>Veillonellaceae</i>         | oral cavity                                       |
| <i>Veillonella parvula</i> ATCC17745                          | <i>Veillonellaceae</i>         | gastrointestinal/genital tract                    |
| <i>Veillonella</i> sp. 6_1_27                                 | <i>Veillonellaceae</i>         | gastrointestinal tract/feces                      |
| <i>Veillonella</i> sp. oral taxon 780 str. F0422              | <i>Veillonellaceae</i>         | oral cavity                                       |
| <b>Proteobacteria</b>                                         |                                |                                                   |
| <b>Alphaproteobacteria</b>                                    |                                |                                                   |
| <i>Acetobacter aceti</i> NBRC 14818                           | <i>Acetobacteraceae</i>        | environmental sample                              |
| <i>Azospirillum</i> sp. B510                                  | <i>Rhodospirillaceae</i>       | vegetation                                        |
| <i>Bradyrhizobium</i> sp. BTai1                               | <i>Bradyrhizobiaceae</i>       | vegetation                                        |
| <i>Caenispirillum salinarum</i> AK4                           | <i>Rhodospirillaceae</i>       | extremophile (solar saltern)                      |
| <i>Dinoroseobacter shibae</i> DFL 12                          | <i>Rhodobacteraceae</i>        | environmental sample (seawater)                   |
| <i>Gluconacetobacter diazotrophicus</i> PA15                  | <i>Acetobacteriaceae</i>       | vegetation                                        |
| <i>Maritimibacter alkaliphilus</i> ATCC2654                   | <i>Rhodobacteraceae</i>        | environmental sample (seawater)                   |
| <i>Methylocystis</i> sp. ATCC 49242                           | <i>Methylocystaceae</i>        | environmental sample (sewage, fresh water)        |
| <i>Methylosinus trichosporium</i> OB3b                        | <i>Methylocystaceae</i>        | environmental sample (soil, fresh water)          |
| <i>Nitrobacter hamburgensis</i> X14                           | <i>Bradyrhizobiaceae</i>       | environmental sample (soil)                       |
| <i>Parvibaculum lavamentivorans</i> DS-1                      | <i>Phyllobacteriaceae</i>      | environmental sample (sewage)                     |
| <i>Puniceispirillum marinum</i> IMCC1322                      | <i>SAR16 clade</i>             | environmental sample (seawater)                   |
| <i>Rhodopseudomonas palustris</i> BisB18                      | <i>Bradyrhizobiaceae</i>       | environmental sample (soil)                       |
| <i>Rhodospirillum rubrum</i> ATCC 11170                       | <i>Rhodospirillaceae</i>       | environmental sample (sea mud)                    |
| <i>Rhodovulum</i> sp. PH10                                    | <i>Rhodobacteraceae</i>        | environmental sample (soil)                       |
| <i>Sphingobium</i> sp. AP49                                   | <i>Sphingomonadaceae</i>       | vegetation                                        |
| <i>Sphingomonas</i> sp. S17                                   | <i>Sphingomonadaceae</i>       | environmental sample (stromatolite)               |
| <i>Tistrella mobilis</i> KA081020-065                         | <i>Rhodospirillaceae</i>       | environmental sample (seawater)                   |
| <b>Betaproteobacteria</b>                                     |                                |                                                   |
| <i>Acidovorax avenae</i> subsp. <i>avenae</i> ATCC 19860      | <i>Comamonadaceae</i>          | environmental sample (soil)                       |
| <i>Acidovorax ebreus</i> TPSY                                 | <i>Comamonadaceae</i>          | environmental sample (water)                      |
| <i>Burkholderiales</i> bacterium 1 1 47                       | <i>Burkholderiales</i>         | gastrointestinal tract/feces                      |
| <i>Kingella kingae</i> ATCC 23330                             | <i>Neisseriaceae</i>           | oral cavity                                       |

| Strain <sup>a</sup>                                                   | Class                     | Isolation/habitat <sup>b</sup>             |
|-----------------------------------------------------------------------|---------------------------|--------------------------------------------|
| <b>Betaproteobacteria (continued)</b>                                 |                           |                                            |
| <i>Neisseria bacilliformis</i> ATCC BAA-1200                          | <i>Neisseriaceae</i>      | oral cavity                                |
| <i>Neisseria cinerea</i> ATCC 14685                                   | <i>Neisseriaceae</i>      | oral cavity                                |
| <i>Neisseria flavescens</i> SK114                                     | <i>Neisseriaceae</i>      | human clinical specimens                   |
| <i>Neisseria lactamica</i> 020-06                                     | <i>Neisseriaceae</i>      | oral cavity                                |
| <i>Neisseria meningitides</i> Z2491                                   | <i>Neisseriaceae</i>      | oral cavity                                |
| <i>Neisseria mucosa</i> C102                                          | <i>Neisseriaceae</i>      | oral cavity (expectorated sputum)          |
| <i>Neisseria</i> sp. oral taxon 014 str. F0314                        | <i>Neisseriaceae</i>      | oral cavity                                |
| <i>Neisseria subflava</i> NJ9703                                      | <i>Neisseriaceae</i>      | oral cavity                                |
| <i>Neisseria wadsworthii</i> 9715                                     | <i>Neisseriaceae</i>      | skin                                       |
| <i>Nitrosomonas</i> sp. AL212                                         | <i>Nitrosomonadaceae</i>  | environmental sample (fresh water)         |
| <i>Parasutterella excrementihominis</i> YIT 11859                     | <i>Alcaligenaceae</i>     | gastrointestinal tract/feces               |
| <i>Ralstonia syzygii</i> R24                                          | <i>Burkholderiaceae</i>   | environmental sample (soil)                |
| <i>Simonsiella muelleri</i> ATCC 29453                                | <i>Neisseriaceae</i>      | oral cavity                                |
| <i>Sutterella parvirubra</i> YIT 11816                                | <i>Alcaligenaceae</i>     | gastrointestinal tract/feces               |
| <i>Sutterella wadsworthensis</i> 3 1 45B                              | <i>Alcaligenaceae</i>     | gastrointestinal tract/feces               |
| <i>Verminephrobacter aporrectodeae</i> subsp. <i>tuberculatae</i> At4 | <i>Comamonadaceae</i>     | invertebrate (earthworm)                   |
| <i>Verminephrobacter eiseniae</i> EF01-2                              | <i>Comamonadaceae</i>     | invertebrate (earthworm)                   |
| <b>Gammaproteobacteria</b>                                            |                           |                                            |
| <i>Actinobacillus minor</i> NM305                                     | <i>Pasteurellaceae</i>    | pig respiratory tract                      |
| <i>Actinobacillus pleuropneumoniae</i> serovar 10 D13039              | <i>Pasteurellaceae</i>    | pig respiratory tract                      |
| <i>Actinobacillus succinogenes</i> 130Z                               | <i>Pasteurellaceae</i>    | rumen                                      |
| <i>Actinobacillus suis</i> H91-0380                                   | <i>Pasteurellaceae</i>    | pig pathogen                               |
| <i>Actinobacillus ureae</i> ATCC 25976                                | <i>Pasteurellaceae</i>    | respiratory tract                          |
| <i>Alcanivorax</i> sp. W11-5                                          | <i>Alcanivoracaceae</i>   | extremophile (deep sea sediment)           |
| <i>Francisella tularensis</i> subsp. <i>holarctica</i> LVS            | <i>Francisellaceae</i>    | engineered live vaccine strain             |
| <i>Francisella tularensis</i> subsp. <i>novicida</i> U112             | <i>Francisellaceae</i>    | human/environmental sample (water)         |
| <i>Francisella tularensis</i> subsp. <i>tularensis</i> WY96-3418      | <i>Francisellaceae</i>    | wound                                      |
| gamma proteobacterium HTCC5015                                        | <i>Unclassified</i>       | environmental sample (seawater)            |
| gammaproteobacterium HdN1                                             | <i>Unclassified</i>       | environmental sample (sewage)              |
| <i>Haemophilus parainfluenzae</i> T3T1                                | <i>Pasteurellaceae</i>    | oral cavity/genital tract                  |
| <i>Haemophilus pittmaniae</i> HK 85                                   | <i>Pasteurellaceae</i>    | oral cavity                                |
| <i>Haemophilus sputorum</i> HK 2154                                   | <i>Pasteurellaceae</i>    | oral cavity                                |
| <i>Legionella pneumophila</i> str. Paris                              | <i>Legionellaceae</i>     | human clinical specimens                   |
| <i>Pasteurella bettyae</i> CCUG 2042                                  | <i>Pasteurellaceae</i>    | genital tract                              |
| <i>Pasteurella multocida</i> subsp. <i>gallicida</i> X73              | <i>Pasteurellaceae</i>    | bird pathogen                              |
| <i>Pasteurella multocida</i> Pm70                                     | <i>Pasteurellaceae</i>    | bird respiratory tract/zoonotic infections |
| <b>Deltaproteobacteria</b>                                            |                           |                                            |
| uncultured delta proteobacterium HF0070_07E19                         | <i>Unclassified</i>       | environmental sample (seawater)            |
| <b>Epsilonproteobacteria</b>                                          |                           |                                            |
| <i>Campylobacter coli</i> 2962                                        | <i>Campylobacteraceae</i> | animals/human pathogen                     |
| <i>Campylobacter jejuni</i> NCTC11168                                 | <i>Campylobacteraceae</i> | bird                                       |
| <i>Campylobacter jejuni</i> subsp. <i>doylei</i> 269-97               | <i>Campylobacteraceae</i> | blood                                      |
| <i>Campylobacter lari</i>                                             | <i>Campylobacteraceae</i> | gastrointestinal tract/feces               |
| <i>Helicobacter canadensis</i> MIT 98-5491                            | <i>Helicobacteriaceae</i> | gastrointestinal tract/feces               |
| <i>Helicobacter cinaedi</i> CCUG 18818                                | <i>Helicobacteriaceae</i> | gastrointestinal tract/feces               |
| <i>Helicobacter hepaticus</i> ATCC 51449                              | <i>Helicobacteriaceae</i> | mouse liver                                |
| <i>Helicobacter mustelae</i> 12198                                    | <i>Helicobacteriaceae</i> | ferret                                     |
| <i>Helicobacter pullorum</i> MIT 98-5489                              | <i>Helicobacteriaceae</i> | bird/zoonotic infections                   |
| <i>Nitratifractor salsuginis</i> DSM 16511                            | <i>Unclassified</i>       | extremophile (deep sea sediment)           |
| <i>Wolinella succinogenes</i> DSM 1740                                | <i>Helicobacteraceae</i>  | rumen                                      |
| <b>Fusobacteria</b>                                                   |                           |                                            |
| <i>Fusobacterium nucleatum</i> subsp. <i>vincentii</i> ATCC 49256     | <i>Fusobacteriaceae</i>   | oral cavity                                |
| <i>Fusobacterium</i> sp. 1_1_41FAA                                    | <i>Fusobacteriaceae</i>   | gastrointestinal tract/feces               |
| <i>Fusobacterium</i> sp. 3_1_27                                       | <i>Fusobacteriaceae</i>   | gastrointestinal tract/feces               |
| <i>Fusobacterium</i> sp. 3_1_36A2                                     | <i>Fusobacteriaceae</i>   | gastrointestinal tract/feces               |
| <i>Ilyobacter polytropus</i> DSM 2926                                 | <i>Fusobacteriaceae</i>   | environmental sample (sea mud)             |

| Strain <sup>a</sup>                                   | Class                      | Isolation/habitat <sup>b</sup>     |
|-------------------------------------------------------|----------------------------|------------------------------------|
| <b>Fusobacteria (continued)</b>                       |                            |                                    |
| <i>Streptobacillus moniliformis</i> DSM 12112         | <i>Leptotrichiaceae</i>    | rodent/human pathogen              |
| <b>Spirochaetes</b>                                   |                            |                                    |
| <i>Leptospira inadai</i> serovar Lyme str. 10         | <i>Leptospiraceae</i>      | human clinical specimens           |
| <i>Sphaerochaeta globus</i> str. Buddy                | <i>Spirochaetaceae</i>     | extremophile (marine hot spring)   |
| <i>Treponema denticola</i> ATCC 35405                 | <i>Spirochaetaceae</i>     | oral cavity                        |
| <i>Treponema phagedenis</i> F0421                     | <i>Spirochaetaceae</i>     | monkey genital tracts              |
| <i>Treponema</i> sp. JC4                              | <i>Spirochaetaceae</i>     | rumen                              |
| <i>Treponema vincentii</i> ATCC 35580                 | <i>Spirochaetaceae</i>     | oral cavity                        |
| <b>Tenericutes</b>                                    |                            |                                    |
| <b>Mollicutes</b>                                     |                            |                                    |
| <i>Mycoplasma canis</i> PG 14                         | <i>Mycoplasmataceae</i>    | dog oral cavity                    |
| <i>Mycoplasma cynos</i> C142                          | <i>Mycoplasmataceae</i>    | dog respiratory tract              |
| <i>Mycoplasma gallisepticum</i> str. F                | <i>Mycoplasmataceae</i>    | bird pathogen                      |
| <i>Mycoplasma iowae</i> 695                           | <i>Mycoplasmataceae</i>    | bird                               |
| <i>Mycoplasma mobile</i> 163K                         | <i>Mycoplasmataceae</i>    | fish pathogen                      |
| <i>Mycoplasma ovipneumoniae</i> SC01                  | <i>Mycoplasmataceae</i>    | goat respiratory tract             |
| <i>Mycoplasma synoviae</i> 53                         | <i>Mycoplasmataceae</i>    | bird pathogen                      |
| <i>Solobacterium moorei</i> F0204                     | <i>Erysipelotrichaceae</i> | gastrointestinal tract/feces       |
| <b>Elusimicrobia</b>                                  |                            |                                    |
| <i>Elusimicrobium minutum</i> Pei191                  | <i>Elusimicrobiaceae</i>   | invertebrate (scarab beetle)       |
| Uncultured Termite group 1 bacterium phylotype Rs-D17 | <i>Elusimicrobiaceae</i>   | invertebrate                       |
| <b>Fibrobacteres</b>                                  |                            |                                    |
| <i>Fibrobacter succinogenes</i> S85                   | <i>Fibrobacteraceae</i>    | rumen                              |
| <b>Ignavibacteria</b>                                 |                            |                                    |
| <i>Ignavibacterium album</i> JCM 16511                | <i>Ignavibacteriaceae</i>  | extremophile (hot water spring)    |
| <b>Planktomycetes</b>                                 |                            |                                    |
| <i>Blastopirellula marina</i> DSM 3645                | <i>Planctomycetaceae</i>   | environmental sample (seawater)    |
| <b>Verrucomicrobia</b>                                |                            |                                    |
| <i>Diplosphaera colitermitum</i> TAV2                 | <i>Opiritaceae</i>         | invertebrate (termite)             |
| <i>Akkermansia muciniphila</i> ATCC BAA-835           | <i>Verrucomicrobiaceae</i> | gastrointestinal tract/feces       |
| <b>Unclassified</b>                                   |                            |                                    |
| candidate division TM7 single-cell isolate TM7c       | <i>Unclassified</i>        | oral cavity                        |
| uncultured bacterium                                  | <i>Unclassified</i>        | environmental sample (groundwater) |
| uncultured bacterium                                  | <i>Unclassified</i>        | environmental sample (groundwater) |
| uncultured bacterium T3_7_42578                       | <i>Unclassified</i>        | invertebrate (honeybee)            |

<sup>a</sup>Single strains representing every species found to harbor the *cas9* gene are listed.

<sup>b</sup>The origin of the specific strain and/or typical habitat of the species are given for every strain. ND, no data available. Note that if not specified otherwise, isolates from body sites and feces are human commensals and pathogens.

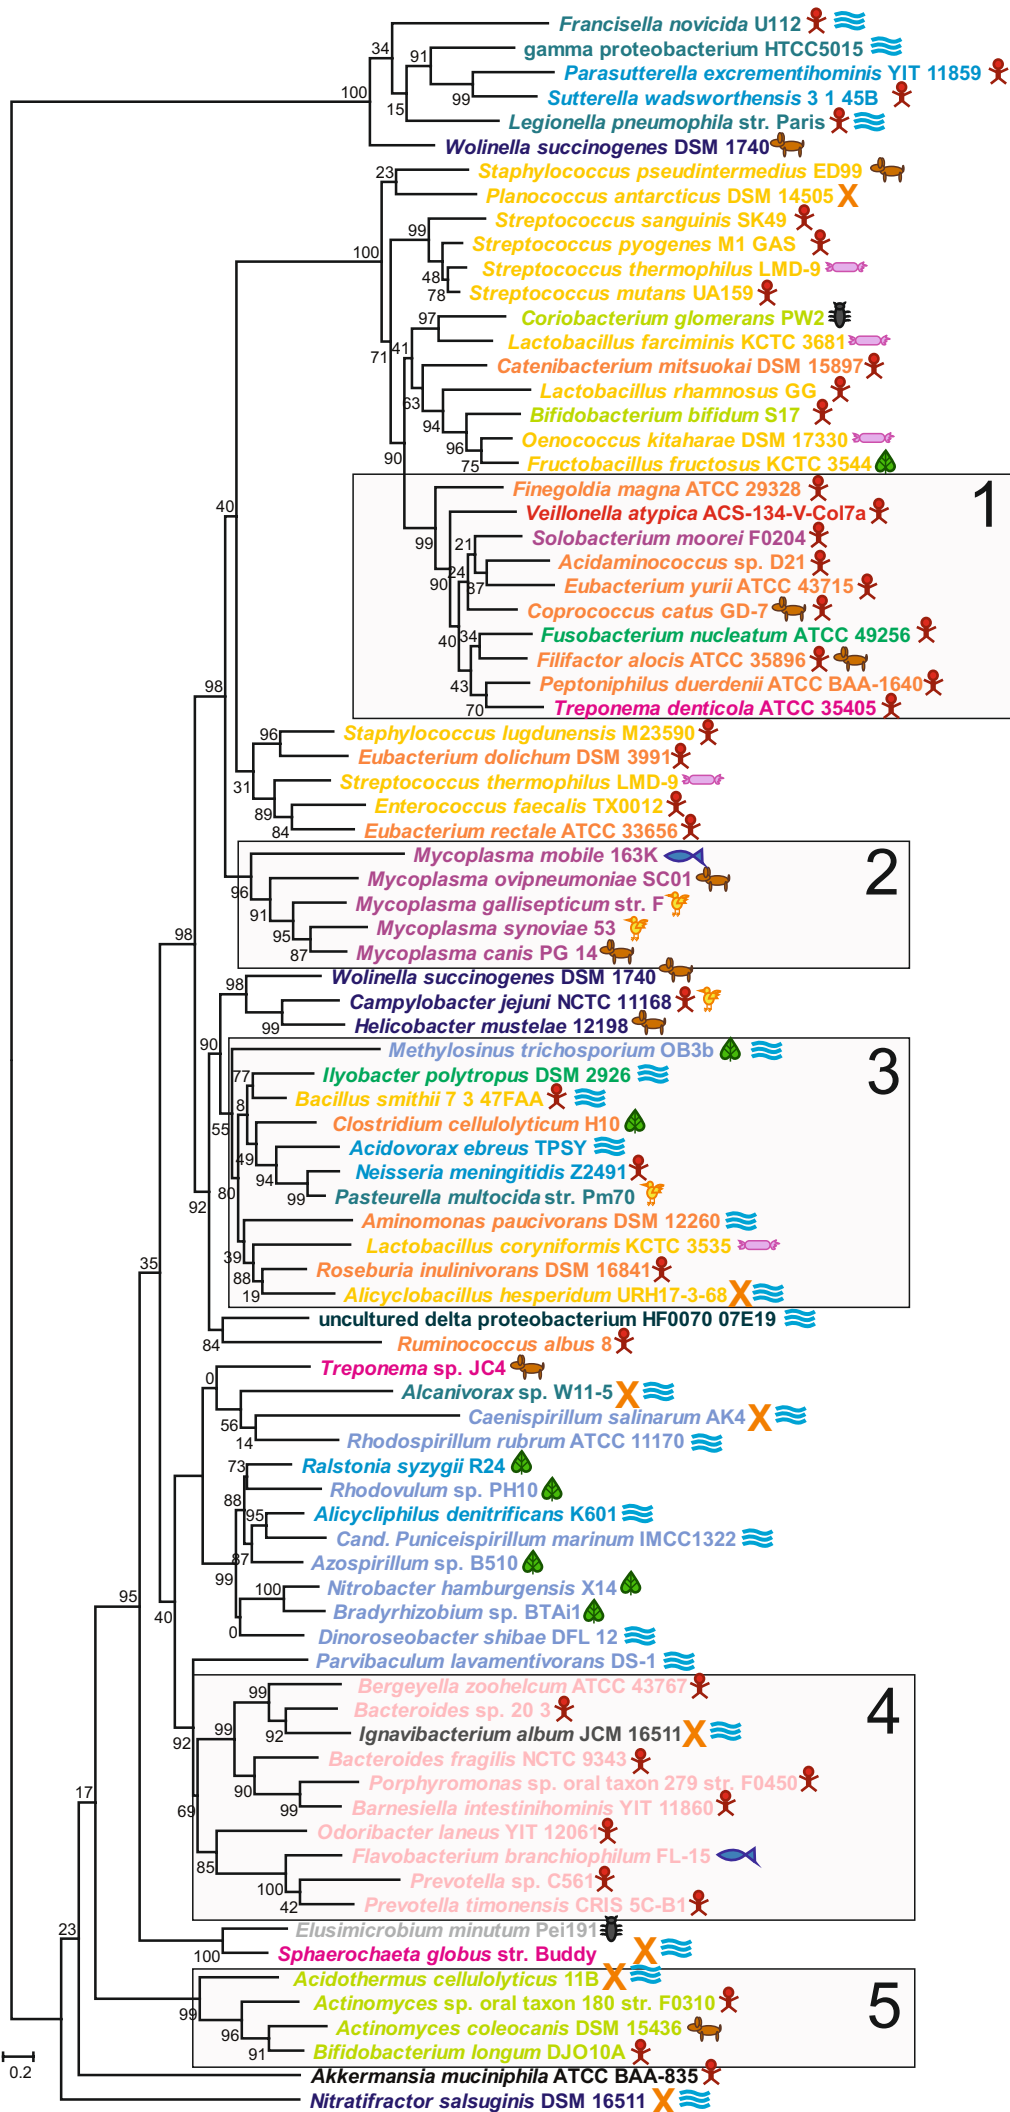

Alphaproteobacteria  
 Betaproteobacteria  
 Gammaproteobacteria  
 Deltaproteobacteria  
 Epsilonproteobacteria  
 Actinobacteria  
 Fusobacteria  
 Bacilli  
 Clostridia  
 Negativicutes  
 Spirochaete  
 Mollicutes  
 Bacteroidetes  
 Elusimicrobia  
 Ignavibacteria  
 Verrucomicrobia

- human
- mammal
- fish
- bird
- invertebrate
- plant/soil
- water
- food
- extreme environment

**Supplementary Figure S11. Cas9 tree topology suggests both horizontal and vertical transfer of type II CRISPR-Cas systems.** See Figure 1, Supplementary Figure S4 and Supplementary Table S4. The codes for taxonomy (phyla in color) and habitat (symbols) of the bacterial strains harboring representative Cas9 orthologs are indicated (right panel). The clusters grouping evolutionary distant bacteria (1 and 3) but isolated mainly from similar sources (human for cluster 1 and mostly environmental samples for cluster 3) suggest horizontal transfer of type II systems. Clusters 2, 4 and 5 group closely related bacteria isolated from diverse habitats indicating vertical transfer of the systems.



*F. novicida*

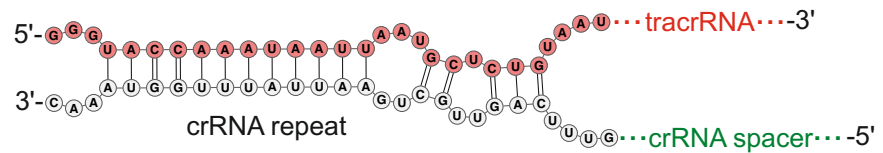

*S. pyogenes*

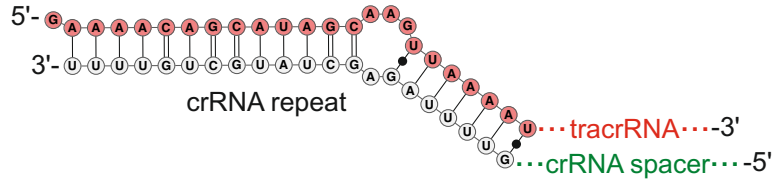

*S. mutans*

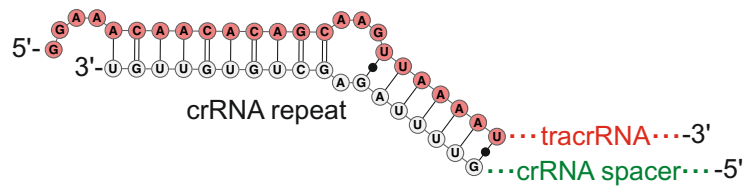

*S. thermophilus\**

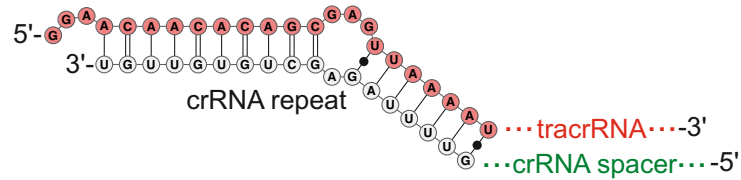

*S. thermophilus\*\**

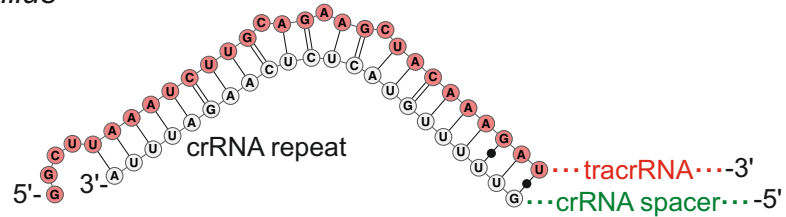

*N. meningitidis*

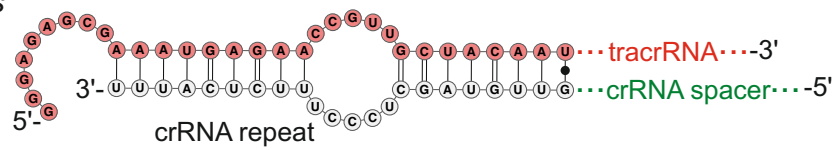

*P. multocida*

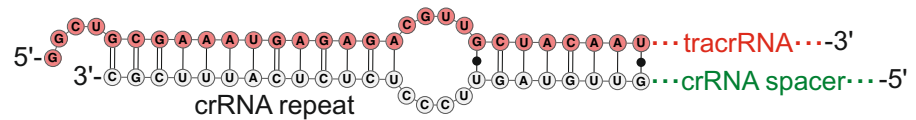

*C. jejuni*

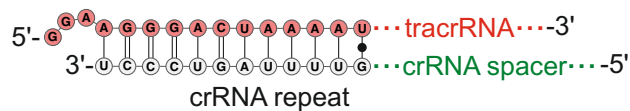

**Supplementary Figure S12. tracrRNA:crRNA repeat duplexes form similar secondary structures in loci with closely related Cas9 orthologs.** Antirepeat sequence of processed tracrRNA (red) and repeat-derived sequence of mature crRNA (grey) were co-folded for each type II CRISPR-Cas locus studied (see Materials and Methods). Color bars indicated on the left group dual-RNAs from loci with closely related Cas9 (see Figure 1 and Supplementary Figure S4). RNA duplexes belonging to the same groups display structural similarities, suggesting a role of the structure in dual-RNA recognition by Cas9.

## Supplementary References

58. Sun, W., Li, G. & Nicholson, A. W. (2004) Mutational analysis of the nuclease domain of *Escherichia coli* ribonuclease III. Identification of conserved acidic residues that are important for catalytic function in vitro. *Biochemistry*, **43**, 13054-13062.
59. Sun, W., Jun, E. & Nicholson, A. W. (2001) Intrinsic double-stranded-RNA processing activity of *Escherichia coli* ribonuclease III lacking the dsRNA-binding domain. *Biochemistry*, **40**, 14976-14984.
